# Supplementary material
Source: publisher figshare collection journal article supplement (https://gsajournals.figshare.com/ndownloader/files/13184105)
Supplement: Supplementary file 1 [file 13184105]

## Sheet: Table S3a (sites_unfiltered)
CDS	CDS position	P_trichocarpa (frequency)	P_alba (frequency)	P_davidiana (frequency)	P_tremula (frequency)	Editing extent_P_tremula (Edera et al. 2018)	Manual Evaluation	P_trichocarpa (alt)	P_trichocarpa (coverage)	P_trichocarpa (count)	P_trichocarpa (frequency)	P_trichocarpa (probability)	P_alba (coverage)	P_alba (count)	P_alba (frequency)	P_alba (probability)	P_davidiana (alt)	P_davidiana (coverage)	P_davidiana (count)	P_davidiana (frequency)	P_davidiana (probability)	P_tremula (alt)	P_tremula (coverage)	P_tremula (count)	P_tremula (frequency)	P_tremula (probability)	Number Of Individual Allels Deviating From Reference	Number Of Allels Matching The Reference With Minimal Coverage
atp1	1041	11.3189	19.3548		14.7059	29.44		T	1016	115	11.3189	1	355	61	19.3548	1	C	364				T	481	65	14.7059	1	3	1
atp1	1425	33.998	26.7969	12.6246	10.9005	10.59		T	1003	341	33.998	1	3315	778	26.7969	1	T	381	41	12.6246	1	T	923	90	10.9005	1	4	0
atp1	1483	11.0714					ok	T	560	62	11.0714	1	326				C	213				C	500				1	3
atp4	382	54.6763	51.9824	41.2587	31.5789	39.34		T	278	152	54.6763	1	372	192	51.9824	1	T	214	63	41.2587	1	T	181	45	31.5789	1	4	0
atp6	37	100	94.1176	84.507	96	97.64		T	168	168	100	1	44	18	94.1176	1	T	173	62	84.507	1	T	103	57	96	1	4	0
atp6	85				30.4348		unspecific--> exclude	C	416				131				C	733				T	313	43	30.4348	1	1	3
atp6	173	98.6813	80	95.3216	95.4128	97.96		T	456	449	98.6813	1	50	38	80	1	T	274	181	95.3216	1	T	181	133	95.4128	1	4	0
atp6	223	98.7179	91.3043	92.5466	97.4138	99.19		T	546	539	98.7179	1	53	48	91.3043	1	T	208	159	92.5466	1	T	163	139	97.4138	1	4	0
atp6	248	99.4329	91.0714	90.3846	97.3684	98.62		T	529	526	99.4329	1	70	62	91.0714	1	T	187	152	90.3846	1	T	155	139	97.3684	1	4	0
atp6	256	100	82.7586	88	95.6522	99.32		T	524	524	100	1	71	57	82.7586	1	T	178	143	88	1	T	133	111	95.6522	1	4	0
atp6	479	95.7237	89.7727	85.7143	98.3871	97.67		T	304	291	95.7237	1	105	91	89.7727	1	T	179	118	85.7143	1	T	101	77	98.3871	1	4	0
atp6	593	94.8424	80	81.8182	93.9024	100		T	349	331	94.8424	1	38	21	80	1	T	157	77	81.8182	1	T	163	94	93.9024	1	4	0
atp6	650	99.6078		81.4815	84	98.75		T	255	254	99.6078	1	24				T	81	23	81.4815	1	T	154	55	84	1	3	1
atp6	658	100		90.4762	83.3333	100		T	220	220	100	1	22				T	72	20	90.4762	1	T	146	50	83.3333	1	3	1
atp6	665	99.0566		80	84.7826	100		T	212	210	99.0566	1	22				T	69	16	80	1	T	143	50	84.7826	1	3	1
atp6	674	99.435		60	83.7838	98.73		T	177	176	99.435	1	18				T	55	9	60	1	T	114	38	83.7838	1	3	1
atp8	366	13.9535	23.5294			18.45		T	301	42	13.9535	1	57	11	23.5294	1	C	241				C	269				2	2
atp8	393	25	17.2414	30.8271	18.4524	31.01		T	232	58	25	1	77	6	17.2414	1	T	234	44	30.8271	1	T	249	34	18.4524	1	4	0
ccmB	28	50				90.48		T	34	17	50	1	17				C	18				C	21				1	3
ccmB	43	74.359	36.3636			94.44		T	39	29	74.359	1	21	4	36.3636	1	C	25				C	30				2	2
ccmB	71	79.1667	60	61.5385	73.3333	96.61		T	48	38	79.1667	1	37	16	60	1	T	33	8	61.5385	1	T	43	16	73.3333	1	4	0
ccmB	80	70.8333	40	35.7143	53.3333	91.07		T	48	34	70.8333	1	37	12	40	1	T	36	5	35.7143	1	T	46	13	53.3333	1	4	0
ccmB	87				26.6667	59.65		C	49				37				C	44				T	45	6	26.6667	1	1	3
ccmB	90	20.4082		25	18.75	22.41		T	49	10	20.4082	1	37				T	43	4	25	1	T	43	3	18.75	0.999993	3	1
ccmB	128	52.6316	20	35.2941	36.3636	87.04		T	38	20	52.6316	1	26	5	20	0.99999	T	41	8	35.2941	1	T	28	6	36.3636	1	4	0
ccmB	137	46.1538	53.3333	33.3333	63.6364	90.74		T	26	12	46.1538	1	24	10	53.3333	1	T	39	6	33.3333	1	T	25	10	63.6364	1	4	0
ccmB	139			16.6667		35.19		C	29				24				T	39	4	16.6667	0.999995	C	25				1	3
ccmB	154	54.8387	53.3333	47.0588	53.8462	91.07		T	31	17	54.8387	1	24	10	53.3333	1	T	37	8	47.0588	1	T	23	7	53.8462	1	4	0
ccmB	160	85.1852	46.6667	52.9412	46.1538	91.11		T	27	23	85.1852	1	22	7	46.6667	1	T	36	9	52.9412	1	T	23	6	46.1538	1	4	0
ccmB	164	51.7241	33.3333	34.7826	46.6667	91.11		T	29	15	51.7241	1	22	5	33.3333	1	T	45	8	34.7826	1	T	22	7	46.6667	1	4	0
ccmB	172	86.6667	53.3333	56.5217	75	88.64		T	30	26	86.6667	1	17	8	53.3333	1	T	42	15	56.5217	1	T	23	14	75	1	4	0
ccmB	179	79.1667		43.4783	62.5	82.86		T	24	19	79.1667	1	11				T	41	11	43.4783	1	T	20	11	62.5	1	3	1
ccmB	181	82.6087		39.1304	66.6667	85.29		T	23	19	82.6087	1	6				T	41	10	39.1304	1	T	19	11	66.6667	1	3	1
ccmB	183	82.6087		26.087	33.3333	58.82		T	23	19	82.6087	1	5				T	41	7	26.087	1	T	18	5	33.3333	1	3	1
ccmB	286	71.2329	33.3333	40.4762	80	98.28		T	73	52	71.2329	1	20	5	33.3333	1	T	52	17	40.4762	1	T	25	14	80	1	4	0
ccmB	313	52.9412	17.6471	18.5185	64	90.91		T	85	45	52.9412	1	21	3	17.6471	0.999841	T	70	12	18.5185	1	T	35	18	64	1	4	0
ccmB	324	13.0952					ok	T	84	11	13.0952	1	26				C	74				C	40				1	3
ccmB	338	63.2184	13.7931	29.0909	90.3226	92		T	87	55	63.2184	1	33	4	13.7931	1	T	74	19	29.0909	1	T	44	33	90.3226	1	4	0
ccmB	374	80.531	63.3333	42.1053	87.0968	81.82		T	113	91	80.531	1	53	31	63.3333	1	T	74	30	42.1053	1	T	45	32	87.0968	1	4	0
ccmB	418	58.7629		22.7273	69.5652	66.2		T	97	57	58.7629	1	53				T	77	13	22.7273	1	T	43	18	69.5652	1	3	1
ccmB	422	79.5699	60	51.1628	87.5	84.72		T	93	74	79.5699	1	53	32	60	1	T	76	26	51.1628	1	T	44	24	87.5	1	4	0
ccmB	461	51.087		26.4706	50	70.42		T	92	47	51.087	1	45				T	65	9	26.4706	1	T	18	8	50	1	3	1
ccmB	479	20.2247		14.2857	36.3636	75.41		T	89	18	20.2247	1	46				T	62	5	14.2857	1	T	12	4	36.3636	1	3	1
ccmB	497	20.2703		16.6667		72.97		T	74	15	20.2703	1	34				T	50	6	16.6667	1	C	4				2	2
ccmB	500	12.5				72.22	unspecific--> exclude	T	64	8	12.5	1	31				C	53				C	6				1	3
ccmB	506	23.3333		30		71.05		T	60	14	23.3333	1	35				T	54	10	30	1	C	11				2	2
ccmB	508	31.1475		20.6897		78.95		T	61	19	31.1475	1	36				T	52	7	20.6897	1	C	12				2	2
ccmB	545	78	41.6667	69.2308		92.16		T	50	39	78	1	26	9	41.6667	1	T	44	19	69.2308	1	C	19				3	1
ccmB	548	67.3469	25	26.9231		94.12		T	49	33	67.3469	1	26	5	25	0.999995	T	44	8	26.9231	1	C	19				3	1
ccmB	563	34.8837				88.33		T	43	15	34.8837	1	26				C	40				C	18				1	3
ccmB	566	64.2857	36.3636	75		95		T	42	27	64.2857	1	25	7	36.3636	1	T	36	16	75	1	C	18				3	1
ccmB	590	62.963		20		84.42		T	27	17	62.963	1	17				T	29	4	20	0.999996	C	17				2	2
ccmC	5	84.8485				97.01		T	66	56	84.8485	1	10				C	17				C	11				1	3
ccmC	45	85.5556		40	80	64.71		T	90	77	85.5556	1	17				T	32	9	40	1	T	26	13	80	1	3	1
ccmC	56				26.3158		unspecific--> exclude	C	109				26				C	43				T	31	5	26.3158	1	1	3
ccmC	76	89.0511	57.8947	55.2632	73.0769	87.23		T	137	122	89.0511	1	30	13	57.8947	1	T	54	22	55.2632	1	T	41	23	73.0769	1	4	0
ccmC	103	87.7907	76.1905	55.8824	83.3333	97.92		T	172	151	87.7907	1	32	18	76.1905	1	T	50	20	55.8824	1	T	44	32	83.3333	1	4	0
ccmC	115	88.3333	70.8333	78.9474	94.1176	100		T	180	159	88.3333	1	37	21	70.8333	1	T	54	31	78.9474	1	T	52	41	94.1176	1	4	0
ccmC	133	93.0233	62.5	80	93.9394	98.92		T	172	160	93.0233	1	44	23	62.5	1	T	53	29	80	1	T	50	41	93.9394	1	4	0
ccmC	161	94	87.5	75	94.7368	100		T	200	188	94	1	40	34	87.5	1	T	49	25	75	1	T	60	46	94.7368	1	4	0
ccmC	179	95.6522	47.1698		15.8416	96.19		T	230	220	95.6522	1	107	33	47.1698	1	C	590				T	475	42	15.8416	1	3	1
ccmC	182		45.283				unspecific--> exclude	C	232				106	25	45.283	1	C	648				C	534				1	3
ccmC	184	94.0426	41.5094			91.96		T	235	221	94.0426	1	106	29	41.5094	1	C	683				C	535				2	2
ccmC	242		42.4658				unspecific--> exclude	C	231				163	55	42.4658	1	C	1141				C	1051				1	3
ccmC	276			61.5672	50.7905			C	208				137				T	926	190	61.5672	1	T	1108	391	50.7905	1	2	2
ccmC	281	93.7198	34.9206	13.9706		98.92		T	207	194	93.7198	1	141	32	34.9206	1	T	906	45	13.9706	1	C	1126				3	1
ccmC	311		54.0984				unspecific--> exclude	C	175				123	43	54.0984	1	C	523				C	961				1	3
ccmC	331	96.5	29.5082	11.1588		98.8		T	200	193	96.5	1	111	23	29.5082	1	T	528	28	11.1588	1	C	850				3	1
ccmC	354		25.7143				unspecific--> exclude	C	214				72	12	25.7143	1	C	438				C	582				1	3
ccmC	381			45.1613			unspecific--> exclude	C	210				49				T	210	57	45.1613	1	C	302				1	3
ccmC	395	92.0398	52.9412		28.5714	93.24		T	201	185	92.0398	1	43	19	52.9412	1	C	153				T	208	46	28.5714	1	3	1
ccmC	399	78.9216	35.2941	16.4706	24.2424	79.22		T	204	161	78.9216	1	43	12	35.2941	1	T	126	15	16.4706	1	T	203	38	24.2424	1	4	0
ccmC	421	91.6168		55.5556	82.3529	91.94		T	167	153	91.6168	1	23				T	36	16	55.5556	1	T	46	31	82.3529	1	3	1
ccmC	436	89.9441		44	73.0769	86.96		T	179	161	89.9441	1	19				T	32	11	44	1	T	36	21	73.0769	1	3	1
ccmC	446	88.3041		53.5714	77.7778	81.43		T	171	151	88.3041	1	18				T	32	16	53.5714	1	T	44	25	77.7778	1	3	1
ccmC	458	86.3636		54.5455	73.0769	86.84		T	154	133	86.3636	1	16				T	38	20	54.5455	1	T	39	23	73.0769	1	3	1
ccmC	467	72.5352		60	65.2174	95.89		T	142	103	72.5352	1	16				T	40	22	60	1	T	35	17	65.2174	1	3	1
ccmC	473	91.4062	21.4286	60.6061	72.7273	97.22		T	128	117	91.4062	1	16	3	21.4286	0.999989	T	38	22	60.6061	1	T	34	18	72.7273	1	4	0
ccmC	497	87.8049		92.8571	82.7586	91.67		T	164	144	87.8049	1	26				T	50	41	92.8571	1	T	56	29	82.7586	1	3	1
ccmC	521	96.4706	42.8571	92.3077	88.5714	96.94		T	170	164	96.4706	1	23	9	42.8571	1	T	56	40	92.3077	1	T	73	37	88.5714	1	4	0
ccmC	548	86.6667	21.4286	82.3529	83.3333	90.91		T	150	130	86.6667	1	19	4	21.4286	0.99999	T	53	32	82.3529	1	T	74	35	83.3333	1	4	0
ccmC	568	90.9774		79.3103	93.75	95.1		T	133	121	90.9774	1	21				T	45	24	79.3103	1	T	58	32	93.75	1	3	1
ccmC	575	87.6033	21.4286	60	83.3333	90.1		T	121	106	87.6033	1	19	4	21.4286	0.999992	T	40	15	60	1	T	57	25	83.3333	1	4	0
ccmC	605	44.2748	28.5714	28	60	85.25		T	131	58	44.2748	1	20	5	28.5714	1	T	40	8	28	1	T	45	17	60	1	4	0
ccmC	608	90.4762	38.4615	46.1538	95.6522	94.92		T	126	114	90.4762	1	20	6	38.4615	1	T	43	13	46.1538	1	T	44	27	95.6522	1	4	0
ccmC	614	79.2793		28	95.4545	89.06		T	111	88	79.2793	1	18				T	47	8	28	1	T	44	26	95.4545	1	3	1
ccmC	619	38.3178		58.3333	57.6923	89.71		T	107	41	38.3178	1	15				T	49	15	58.3333	1	T	58	19	57.6923	1	3	1
ccmC	624	12.766			16	27.85		T	94	12	12.766	1	11				C	68				T	55	4	16	1	2	2
ccmC	650	97.7011		56.4103	88.5714	92.98		T	87	85	97.7011	1	11				T	75	26	56.4103	1	T	70	38	88.5714	1	3	1
ccmC	656	97.7011		66.6667	91.4286	96.36		T	87	85	97.7011	1	11				T	75	30	66.6667	1	T	71	39	91.4286	1	3	1
ccmC	673	92.5		56.4103	83.3333	90.24		T	80	74	92.5	1	10				T	71	24	56.4103	1	T	73	38	83.3333	1	3	1
ccmC	705				10.7143		unspecific--> exclude	C	80				7				C	54				T	60	3	10.7143	0.999971	1	3
ccmFc	38	31.8182	36.3636	24		92.68		T	44	14	31.8182	1	25	4	36.3636	1	T	35	7	24	1	C	18				3	1
ccmFc	50	73.4694	42.8571	48.2759		90.48		T	49	36	73.4694	1	30	6	42.8571	1	T	42	15	48.2759	1	C	21				3	1
ccmFc	52	73.4694	28.5714	48.2759		85.71		T	49	36	73.4694	1	31	4	28.5714	1	T	42	15	48.2759	1	C	21				3	1
ccmFc	103	88.3333	48.3871	51.7241	77.7778	91.89		T	60	53	88.3333	1	50	18	48.3871	1	T	53	16	51.7241	1	T	33	17	77.7778	1	4	0
ccmFc	119	73.2143	67.6471	40.7407	62.5	81.48		T	56	41	73.2143	1	43	27	67.6471	1	T	48	12	40.7407	1	T	34	12	62.5	1	4	0
ccmFc	122	69.6429	67.6471	48.1481	81.25	88.46		T	56	39	69.6429	1	42	27	67.6471	1	T	48	14	48.1481	1	T	34	16	81.25	1	4	0
ccmFc	146	83.3333	67.6471	54.8387	55	83.78		T	54	45	83.3333	1	56	37	67.6471	1	T	56	18	54.8387	1	T	31	13	55	1	4	0
ccmFc	310	43.6123	51.8519	46.6667	18.0556	81.54		T	227	99	43.6123	1	298	31	51.8519	1	T	151	30	46.6667	1	T	186	16	18.0556	1	4	0
ccmFc	315	56.8889			66.1972		unspecific--> exclude	T	225	128	56.8889	1	298				C	151				T	181	53	66.1972	1	2	2
ccmFc	321	63.6771			69.4444	10.67		T	223	142	63.6771	1	298				C	153				T	182	57	69.4444	1	2	2
ccmFc	333		12.963		11.2676	65.38		C	225				303	11	12.963	1	C	151				T	179	9	11.2676	1	2	2
ccmFc	334	10.2222	18.5185	36.6667		37.5		T	225	23	10.2222	1	305	11	18.5185	1	T	151	23	36.6667	1	C	178				3	1
ccmFc	342	13.1818				12.94		T	220	29	13.1818	1	306				C	139				C	173				1	3
ccmFc	406	97.1963	65	62.2449	80.5556	89.19		T	107	104	97.1963	1	67	43	65	1	T	120	65	62.2449	1	T	55	39	80.5556	1	4	0
ccmFc	744	45.7143	33.3333	18.4211	38.8889	40		T	70	32	45.7143	1	26	8	33.3333	1	T	51	7	18.4211	1	T	21	7	38.8889	1	4	0
ccmFc	793	12.0482					ok	T	83	10	12.0482	1	31				C	43				C	25				1	3
ccmFc	878	86.9048	80.7692	92.3077	85	97.92		T	84	73	86.9048	1	48	35	80.7692	1	T	58	39	92.3077	1	T	28	21	85	1	4	0
ccmFc	1160	77.2152	83.3333	78.125	91.4286	100		T	79	61	77.2152	1	90	72	83.3333	1	T	69	51	78.125	1	T	38	34	91.4286	1	4	0
ccmFc	1234	77.5281	98	56.0976	87.5	97.62		T	89	69	77.5281	1	87	82	98	1	T	49	25	56.0976	1	T	47	39	87.5	1	4	0
ccmFc	1315	83.7838	91.6667	73.1343	88.5714	91.3		T	37	31	83.7838	1	44	34	91.6667	1	T	85	53	73.1343	1	T	40	32	88.5714	1	4	0
ccmFn	29	11.828					ok	T	93	11	11.828	1	16				C	27				C	16				1	3
ccmFn	38	88.4615	50	53.8462	100	97.01		T	104	92	88.4615	1	18	7	50	1	T	33	8	53.8462	1	T	21	15	100	1	4	0
ccmFn	98	82.197	61.5385	72	94.1176	92.47		T	264	217	82.197	1	50	26	61.5385	1	T	50	19	72	1	T	32	20	94.1176	1	4	0
ccmFn	118	13.9683					ok	T	315	44	13.9683	1	47				C	58				C	40				1	3
ccmFn	137	98.7421	32.1429	76	86.3636	96.77		T	318	314	98.7421	1	40	12	32.1429	1	T	52	21	76	1	T	41	31	86.3636	1	4	0
ccmFn	142	90.3537	60.7143	79.1667	76	87.91		T	311	281	90.3537	1	40	20	60.7143	1	T	54	22	79.1667	1	T	43	28	76	1	4	0
ccmFn	151	90.6452	64.2857	72.7273	74.0741	91.95		T	310	281	90.6452	1	38	21	64.2857	1	T	51	19	72.7273	1	T	45	28	74.0741	1	4	0
ccmFn	248	94.3231	84.6154	76.7442	93.3333	92.31		T	229	216	94.3231	1	27	22	84.6154	1	T	53	36	76.7442	1	T	20	18	93.3333	1	4	0
ccmFn	256	96.5517	76.9231	56.8182	87.5	97.83		T	232	224	96.5517	1	27	20	76.9231	1	T	54	28	56.8182	1	T	21	18	87.5	1	4	0
ccmFn	261		11.1111				ok	C	233				31	3	11.1111	0.999967	C	56				C	21				1	3
ccmFn	263	94.7598	78.5714	59.5745	77.7778	95.45		T	229	217	94.7598	1	31	25	78.5714	1	T	58	31	59.5745	1	T	83	18	77.7778	1	4	0
ccmFn	279	30.8594	20.6897	10.2041	55.5556	60.98		T	256	79	30.8594	1	32	7	20.6897	1	T	58	5	10.2041	1	T	27	10	55.5556	1	4	0
ccmFn	283	85.6031	72.4138	64.7059	80	85.37		T	257	220	85.6031	1	32	24	72.4138	1	T	59	33	64.7059	1	T	29	19	80	1	4	0
ccmFn	303	38.6973	13.0435					T	261	101	38.6973	1	26	3	13.0435	0.999971	C	67				C	35				2	2
ccmFn	365	92.8854	91.8919	49.0909	83.3333	100		T	253	235	92.8854	1	46	40	91.8919	1	T	61	30	49.0909	1	T	42	31	83.3333	1	4	0
ccmFn	372	78.0769	56.7568	24.1935	65.3846	80		T	260	203	78.0769	1	43	21	56.7568	1	T	67	16	24.1935	1	T	45	27	65.3846	1	4	0
ccmFn	400	18.5714					ok	T	280	52	18.5714	1	56				C	74				C	46				1	3
ccmFn	453	15.9468					ok	T	301	48	15.9468	1	32				C	93				C	42				1	3
ccmFn	604	23.2919		10.3448	21.7391	27.03		T	322	75	23.2919	1	14				T	67	6	10.3448	1	T	33	5	21.7391	1	3	1
ccmFn	713	91.7949	69.2308	52.6316	72	97.62		T	195	179	91.7949	1	20	12	69.2308	1	T	57	30	52.6316	1	T	32	20	72	1	4	0
ccmFn	751	88.961	85.7143	72.7273	90.9091	97.83		T	154	137	88.961	1	24	21	85.7143	1	T	57	41	72.7273	1	T	28	24	90.9091	1	4	0
ccmFn	756	12.1212	31.8182	10.9091				T	165	20	12.1212	1	25	9	31.8182	1	T	58	6	10.9091	1	C	30				3	1
ccmFn	773	90.9091	63.6364	73.5849	96.1538	100		T	209	190	90.9091	1	24	16	63.6364	1	T	57	40	73.5849	1	T	33	28	96.1538	1	4	0
ccmFn	785	95.9091	80.9524	76.9231	91.6667	96		T	220	211	95.9091	1	24	20	80.9524	1	T	55	40	76.9231	1	T	33	25	91.6667	1	4	0
ccmFn	800	87.7049	77.7778	73.4694	80	92.98		T	244	214	87.7049	1	25	17	77.7778	1	T	55	36	73.4694	1	T	33	24	80	1	4	0
ccmFn	949	91.0959	88.8889	64.1026	65.7143	100		T	292	266	91.0959	1	21	18	88.8889	1	T	89	54	64.1026	1	T	45	25	65.7143	1	4	0
ccmFn	999		11.5385			11.11		C	262				30	3	11.5385	0.999878	C	82				C	41				1	3
ccmFn	1295	86.4198	76.1905	69.9029	72.5	97.06		T	162	140	86.4198	1	32	25	76.1905	1	T	128	81	69.9029	1	T	55	36	72.5	1	4	0
ccmFn	1312	83.5938	73.6842	73.9583	79.4118	87.3		T	128	107	83.5938	1	29	21	73.6842	1	T	114	79	73.9583	1	T	45	30	79.4118	1	4	0
ccmFn	1327	80.3797	84.2105	70.0855	78.5714	100		T	158	127	80.3797	1	31	27	84.2105	1	T	134	87	70.0855	1	T	49	37	78.5714	1	4	0
ccmFn	1345	83.4197	64.7059	66	71.0526	100		T	193	161	83.4197	1	24	17	64.7059	1	T	169	101	66	1	T	45	30	71.0526	1	4	0
ccmFn	1378	91.8367	76.4706	78.4431	87.2727	100		T	245	225	91.8367	1	20	14	76.4706	1	T	181	136	78.4431	1	T	71	56	87.2727	1	4	0
ccmFn	1396	85.5019	72.2222	62.4204	72.549	100		T	269	230	85.5019	1	21	14	72.2222	1	T	171	100	62.4204	1	T	72	43	72.549	1	4	0
ccmFn	1420	40.1929		22.7642	14	22.03		T	311	125	40.1929	1	9				T	136	29	22.7642	1	T	64	8	14	1	3	1
ccmFn	1439	90	72.7273	54.8387	67.9245	100		T	300	270	90	1	11	8	72.7273	1	T	102	53	54.8387	1	T	71	44	67.9245	1	4	0
ccmFn	1459	82.1918		63.0435	64.5833	100		T	292	240	82.1918	1	9				T	105	59	63.0435	1	T	62	37	64.5833	1	3	1
ccmFn	1463	91.7857		70.2128	84	100		T	280	257	91.7857	1	9				T	108	70	70.2128	1	T	63	49	84	1	3	1
ccmFn	1475	86.9565		61.9565	71.7391	100		T	276	240	86.9565	1	12				T	109	61	61.9565	1	T	57	37	71.7391	1	3	1
ccmFn	1510	95.5631	88	76.8421	89.7436	98.41		T	293	280	95.5631	1	32	26	88	1	T	111	78	76.8421	1	T	53	42	89.7436	1	4	0
cob	732		12.3967				polyT-->exclude	C	258				164	21	12.3967	1	C	115				C	79				1	3
cob	908	95.0413	94.2857	95.1456	93.5484	100		T	242	230	95.0413	1	49	42	94.2857	1	T	118	102	95.1456	1	T	120	103	93.5484	1	4	0
cob	982	98.1818	95.3488	85.4651	95.5556	99.37		T	275	270	98.1818	1	97	92	95.3488	1	T	302	161	85.4651	1	T	129	109	95.5556	1	4	0
cob	993		11.1111				ok	C	345				113	11	11.1111	1	C	325				C	134				1	3
cob	1084	98.7603	96.6942	92.0354	97.7011	99.59		T	484	478	98.7603	1	270	195	96.6942	1	T	234	119	92.0354	1	T	146	101	97.7011	1	4	0
cob	1098			25.6			ok	C	461				247				T	217	37	25.6	1	C	167				1	3
cox1	1105				10.989		unspecific--> exclude	C	530				214				C	478				T	395	36	10.989	1	1	3
matR	32	15.2866				13.85		T	157	24	15.2866	1	452				C	107				C	74				1	3
mttB	14	48.9796					ok	T	49	24	48.9796	1	16				C	11				C	19				1	3
mttB	52	65.9574			54.5455			T	94	62	65.9574	1	27				C	17				T	25	6	54.5455	1	2	2
mttB	88	75.3731		60				T	134	101	75.3731	1	34				T	23	8	60	1	C	21				2	2
mttB	116	72.8916		72.7273				T	166	121	72.8916	1	20				T	30	11	72.7273	1	C	12				2	2
mttB	119	61.5854		61.5385				T	164	101	61.5854	1	20				T	32	10	61.5385	1	C	11				2	2
mttB	176	97.9487		72.2222	100			T	195	191	97.9487	1	8				T	34	17	72.2222	1	T	29	18	100	1	3	1
mttB	190	85.4922		68.75	86.6667			T	193	165	85.4922	1	9				T	24	13	68.75	1	T	22	13	86.6667	1	3	1
mttB	250	84.8276		69.2308	88.2353			T	145	123	84.8276	1	6				T	20	11	69.2308	1	T	31	22	88.2353	1	3	1
mttB	316	59.5238					ok	T	84	50	59.5238	1	11				C	13				C	10				1	3
mttB	334	85					ok	T	100	85	85	1	10				C	11				C	9				1	3
mttB	339	12.2449					ok	T	98	12	12.2449	1	11				C	11				C	8				1	3
mttB	341	64.5833					ok	T	96	62	64.5833	1	12				C	10				C	6				1	3
mttB	364	73.8636	70	36.3636	80			T	88	65	73.8636	1	13	7	70	1	T	15	5	36.3636	1	T	13	8	80	1	4	0
mttB	367	60.7595	40	30	70			T	79	48	60.7595	1	12	4	40	1	T	14	4	30	0.999999	T	13	7	70	1	4	0
mttB	395	78.4091		46.1538	76.9231			T	88	69	78.4091	1	13				T	17	7	46.1538	1	T	14	10	76.9231	1	3	1
mttB	493	92.7928	57.1429	77.2727				T	111	103	92.7928	1	18	8	57.1429	1	T	29	19	77.2727	1	C	15				3	1
mttB	529	91.195	63.6364	72.4138	86.6667			T	159	145	91.195	1	17	10	63.6364	1	T	40	25	72.4138	1	T	20	13	86.6667	1	4	0
mttB	536	87.6623	46.1538	64.7059	94.1176			T	154	135	87.6623	1	20	8	46.1538	1	T	47	28	64.7059	1	T	22	16	94.1176	1	4	0
mttB	542	86.8966	45.4545	65.625	88.8889			T	145	126	86.8966	1	17	7	45.4545	1	T	43	25	65.625	1	T	23	16	88.8889	1	4	0
mttB	566	88.8112	63.6364	73.3333	94.4444			T	143	127	88.8112	1	12	7	63.6364	1	T	65	27	73.3333	1	T	25	18	94.4444	1	4	0
mttB	598	90.1961		67.6471	83.3333			T	153	138	90.1961	1	12				T	69	28	67.6471	1	T	29	18	83.3333	1	3	1
mttB	604	70.5882	50	75	56.25			T	153	108	70.5882	1	13	6	50	1	T	71	32	75	1	T	26	12	56.25	1	4	0
mttB	648	91.9255	60	83.3333	84.2105			T	161	148	91.9255	1	21	10	60	1	T	70	32	83.3333	1	T	28	19	84.2105	1	4	0
mttB	655	89.5522		77.7778	88.8889			T	134	120	89.5522	1	22				T	49	28	77.7778	1	T	27	19	88.8889	1	3	1
mttB	660	65.3846		72	50			T	130	85	65.3846	1	22				T	44	24	72	1	T	24	9	50	1	3	1
mttB	701	72.2222		68.1818	53.3333			T	126	91	72.2222	1	21				T	49	19	68.1818	1	T	20	9	53.3333	1	3	1
nad1	125	91.3181	82.9099	78.4615	88.764			T	1267	1157	91.3181	1	829	617	82.9099	1	T	162	56	78.4615	1	T	138	92	88.764	1	4	0
nad1	175	95.1993	95.8525	86.3158	92.2222			T	1104	1051	95.1993	1	776	494	95.8525	1	T	217	89	86.3158	1	T	135	91	92.2222	1	4	0
nad1	286	90.18	86.25	86.6667	98.1481			T	611	551	90.18	1	251	71	86.25	1	T	97	57	86.6667	1	T	75	58	98.1481	1	4	0
nad1	400	99.7396	100	96.9231	96.7742			T	384	383	99.7396	1	66	31	100	1	T	137	65	96.9231	1	T	161	112	96.7742	1	4	0
nad1	403	96.4377	100	88.5714	91.7526			T	393	379	96.4377	1	75	37	100	1	T	149	64	88.5714	1	T	166	109	91.7526	1	4	0
nad1	410	92.7136	88.2353	82.8947	86.7925			T	398	369	92.7136	1	77	34	88.2353	1	T	153	64	82.8947	1	T	168	113	86.7925	1	4	0
nad1	446	92.053	96.1538	88.6598	85.8491			T	302	278	92.053	1	50	27	96.1538	1	T	182	90	88.6598	1	T	154	102	85.8491	1	4	0
nad1	483	91.5129	93.1818	92.7835	86			T	271	248	91.5129	1	100	50	93.1818	1	T	179	99	92.7835	1	T	166	106	86	1	4	0
nad1	545	93.2432	98.5075	89.6552	90.4255			T	148	138	93.2432	1	144	73	98.5075	1	T	132	83	89.6552	1	T	143	94	90.4255	1	4	0
nad1	584	97.7273	98.4375	100	90.7692			T	88	86	97.7273	1	151	101	98.4375	1	T	93	77	100	1	T	119	70	90.7692	1	4	0
nad1	635	90.3553	94.1176	84.8214	83.6364			T	197	178	90.3553	1	102	70	94.1176	1	T	147	95	84.8214	1	T	77	49	83.6364	1	4	0
nad1	644	89.9225	94.3662	90	81.9444			T	258	232	89.9225	1	161	81	94.3662	1	T	186	117	90	1	T	98	62	81.9444	1	4	0
nad1	650	90.4605	91.6667	90	80.9524			T	304	275	90.4605	1	165	79	91.6667	1	T	208	126	90	1	T	116	72	80.9524	1	4	0
nad1	653	87.8698	90.2778	80.6897	75.9036			T	338	297	87.8698	1	168	77	90.2778	1	T	215	117	80.6897	1	T	112	66	75.9036	1	4	0
nad1	665	83.9599	88	73.3766	69.0476			T	399	335	83.9599	1	174	76	88	1	T	280	119	73.3766	1	T	121	62	69.0476	1	4	0
nad1	712	95.5095	86.8421	90.2439	84.7826			T	579	553	95.5095	1	155	47	86.8421	1	T	500	218	90.2439	1	T	258	155	84.7826	1	4	0
nad1	808	86.9396	64.7059	74.8387	83.0508			T	513	446	86.9396	1	50	18	64.7059	1	T	325	137	74.8387	1	T	197	118	83.0508	1	4	0
nad1	838	86.8766	66.6667	75.5556	76.9231			T	381	331	86.8766	1	39	15	66.6667	1	T	267	119	75.5556	1	T	166	90	76.9231	1	4	0
nad1	847	86.8035	69.2308	70.0855	80			T	341	296	86.8035	1	37	14	69.2308	1	T	229	100	70.0855	1	T	139	84	80	1	4	0
nad2	26	80	33.3333	70.3704	56.5217	80		T	120	96	80	1	45	5	33.3333	1	T	128	19	70.3704	1	T	74	16	56.5217	1	4	0
nad2	56	83.8863	69.5652	78.5714	68.0851	85.53		T	211	177	83.8863	1	68	17	69.5652	1	T	228	35	78.5714	1	T	118	40	68.0851	1	4	0
nad2	252	11.8557					ok	T	388	46	11.8557	1	67				C	125				C	114				1	3
nad2	262		37.5	36.5079	28.7671	22.95		C	346				49	9	37.5	1	T	109	23	36.5079	1	T	108	24	28.7671	1	3	1
nad2	303	21.1055				21.84		T	398	84	21.1055	1	83				C	149				C	80				1	3
nad2	308	93.2331	95.7746	66.6667	81.9444	96		T	399	372	93.2331	1	85	74	95.7746	1	T	155	80	66.6667	1	T	87	64	81.9444	1	4	0
nad2	311	78.7342	97.1831	83.8983	79.4521	93.51		T	395	311	78.7342	1	87	76	97.1831	1	T	161	105	83.8983	1	T	88	63	79.4521	1	4	0
nad2	361	94.7368	97.5904	63.2653	83.7209	96.23		T	475	450	94.7368	1	94	91	97.5904	1	T	126	68	63.2653	1	T	114	83	83.7209	1	4	0
nad2	367	86.4333	72.8395	56.8421	72.7273	87.13		T	457	395	86.4333	1	92	69	72.8395	1	T	123	58	56.8421	1	T	118	73	72.7273	1	4	0
nad2	394	84.1603	76.25	74.5763	78.1609	82.65		T	524	441	84.1603	1	148	112	76.25	1	T	89	46	74.5763	1	T	133	86	78.1609	1	4	0
nad2	401	89.7533	86.4198	72.5806	78.022	84		T	527	473	89.7533	1	143	120	86.4198	1	T	94	47	72.5806	1	T	140	88	78.022	1	4	0
nad2	428	96.6527	84.3373	66.6667	87.037	92.66		T	478	462	96.6527	1	104	80	84.3373	1	T	99	50	66.6667	1	T	157	116	87.037	1	4	0
nad2	497	93.7669	89.7436	69.0476	90.1408	93.1		T	369	346	93.7669	1	58	39	89.7436	1	T	127	62	69.0476	1	T	99	76	90.1408	1	4	0
nad2	523	95.0769	88.2353	76.1194	93.2203	95.24		T	325	309	95.0769	1	32	22	88.2353	1	T	108	57	76.1194	1	T	77	64	93.2203	1	4	0
nad2	609	28.0576	47.8261	17.0455	17.284	73.08		T	417	117	28.0576	1	137	11	47.8261	1	T	815	15	17.0455	1	T	210	14	17.284	1	4	0
nad2	782	82.0707	68.0851	38.6861	85.8824	97.5		T	396	325	82.0707	1	108	54	68.0851	1	T	266	55	38.6861	1	T	133	83	85.8824	1	4	0
nad2	794	89.7311	63.8298	29.9363	76.5432	90		T	409	367	89.7311	1	112	50	63.8298	1	T	273	51	29.9363	1	T	121	68	76.5432	1	4	0
nad2	803	91.0486	86	73.4568	83.75	97.62		T	391	356	91.0486	1	108	67	86	1	T	251	129	73.4568	1	T	119	77	83.75	1	4	0
nad2	914	90.2622	73.4694	64.0625	78.75	98.85		T	267	241	90.2622	1	55	40	73.4694	1	T	249	131	64.0625	1	T	114	80	78.75	1	4	0
nad2	922	76.9517	66	39.4737	75.9494	96.55		T	269	207	76.9517	1	58	39	66	1	T	231	78	39.4737	1	T	114	78	75.9494	1	4	0
nad2	952	87.1148	87.931	47.619	85.9155	98.91		T	357	311	87.1148	1	93	81	87.931	1	T	222	97	47.619	1	T	88	69	85.9155	1	4	0
nad2	956	81.7942	77.193	32.4607	80.5556	95.7		T	379	310	81.7942	1	90	70	77.193	1	T	224	68	32.4607	1	T	94	65	80.5556	1	4	0
nad2	1052	94.7598	78.1609	56.8862	84.507	87.61		T	458	434	94.7598	1	130	100	78.1609	1	T	205	98	56.8862	1	T	96	65	84.507	1	4	0
nad2	1121	85.8491	67.6923	48.5294	80.3922	96.81		T	318	273	85.8491	1	83	50	67.6923	1	T	209	70	48.5294	1	T	79	47	80.3922	1	4	0
nad2	1270	95.7143	94.4444	86.25	95.6522	97.62		T	350	335	95.7143	1	46	21	94.4444	1	T	144	71	86.25	1	T	79	50	95.6522	1	4	0
nad2	1292	97.5556	78.2609	92.5373	94.4444	100		T	450	439	97.5556	1	39	23	78.2609	1	T	130	62	92.5373	1	T	95	64	94.4444	1	4	0
nad2	1379			11.7647			ok	C	556				73				T	149	6	11.7647	1	C	128				1	3
nad2	1394	91.6143	65.3846	82	89.2308	92.86		T	477	437	91.6143	1	59	21	65.3846	1	T	140	43	82	1	T	118	70	89.2308	1	4	0
nad2	1397	92.3747	42.3077	86	92.1875	83.67		T	459	424	92.3747	1	59	14	42.3077	1	T	137	45	86	1	T	115	72	92.1875	1	4	0
nad2	1402	50.1235	26.9231	30.6122	38.5965	62.75		T	405	203	50.1235	1	59	9	26.9231	1	T	132	17	30.6122	1	T	105	26	38.5965	1	4	0
nad2	1410	81.4815	25	63.8298	62.963	68.69		T	378	308	81.4815	1	54	8	25	1	T	122	32	63.8298	1	T	96	41	62.963	1	4	0
nad2	1451	98.2143	54.5455	62.5	86.6667	100		T	168	165	98.2143	1	19	7	54.5455	1	T	49	15	62.5	1	T	51	33	86.6667	1	4	0
nad3	79	20.678		25.641	18.4615	23.91		T	295	61	20.678	1	116				T	166	25	25.641	1	T	125	16	18.4615	1	3	1
nad4	29	81.5789	90.7407	51.5152	80.4348	92.45		T	190	155	81.5789	1	60	49	90.7407	1	T	76	20	51.5152	1	T	81	44	80.4348	1	4	0
nad4	44	95.9821	90.9091	50	94.7368	98.02		T	224	215	95.9821	1	66	50	90.9091	1	T	94	24	50	1	T	99	66	94.7368	1	4	0
nad4	74	86.4	76.1194	65.9341	77.6699	88.76		T	375	324	86.4	1	144	93	76.1194	1	T	156	63	65.9341	1	T	168	95	77.6699	1	4	0
nad4	77	95.443	79.4521	68.1818	82.243	89.89		T	395	377	95.443	1	150	102	79.4521	1	T	152	64	68.1818	1	T	178	103	82.243	1	4	0
nad4	107	87.2449	92.4051	78.7879	96.1832	97.54		T	392	342	87.2449	1	131	101	92.4051	1	T	153	86	78.7879	1	T	224	166	96.1832	1	4	0
nad4	158	89.6714	87.5	70.5882	88.7218	94.79		T	426	382	89.6714	1	125	92	87.5	1	T	147	77	70.5882	1	T	221	151	88.7218	1	4	0
nad4	164	94.7005	85.2273	58.4158	85.1562	92.94		T	434	411	94.7005	1	121	89	85.2273	1	T	138	61	58.4158	1	T	214	139	85.1562	1	4	0
nad4	166	89.0558	89.7727	55.102	89.9225	97.62		T	466	415	89.0558	1	129	104	89.7727	1	T	135	56	55.102	1	T	212	147	89.9225	1	4	0
nad4	197	93.9759	86.3636	63.8095	86.8421	91.26		T	415	390	93.9759	1	63	53	86.3636	1	T	136	71	63.8095	1	T	180	120	86.8421	1	4	0
nad4	362	93.9834	100	72.3077	95.6522	92.38		T	482	453	93.9834	1	56	27	100	1	T	131	54	72.3077	1	T	120	84	95.6522	1	4	0
nad4	368	91.0973	95.6522	76.2712	95.6522	94.12		T	483	440	91.0973	1	59	26	95.6522	1	T	124	51	76.2712	1	T	125	84	95.6522	1	4	0
nad4	376	96.3907	95.6522	69.1176	91.6667	95.1		T	471	454	96.3907	1	57	25	95.6522	1	T	138	51	69.1176	1	T	121	82	91.6667	1	4	0
nad4	403	94.8454	100	80.8511	96.8254	97.68		T	388	368	94.8454	1	47	20	100	1	T	114	42	80.8511	1	T	101	73	96.8254	1	4	0
nad4	433	95.6811	100	66.6667	96.6667	96.92		T	301	288	95.6811	1	48	25	100	1	T	87	32	66.6667	1	T	100	72	96.6667	1	4	0
nad4	436			17.7778		98.44		C	302				46				T	77	8	17.7778	1	C	95				1	3
nad4	608	96.6926	88.7097	72.3684	85.5422	96.52		T	514	497	96.6926	1	88	57	88.7097	1	T	130	63	72.3684	1	T	134	81	85.5422	1	4	0
nad4	659	94.1053	91.4634	90.991	92.1569	94.4		T	475	447	94.1053	1	92	80	91.4634	1	T	132	108	90.991	1	T	142	111	92.1569	1	4	0
nad4	767	96.6862	85.8268	83.1933	90.1099	95.14		T	513	496	96.6862	1	172	145	85.8268	1	T	149	105	83.1933	1	T	109	87	90.1099	1	4	0
nad4	836	84.7059	71.5686	75	86.3014	92.42		T	425	360	84.7059	1	145	89	71.5686	1	T	164	88	75	1	T	208	150	86.3014	1	4	0
nad4	857	97.2637	92.1569	82.7586	93.7931	98.25		T	402	391	97.2637	1	145	114	92.1569	1	T	172	104	82.7586	1	T	207	166	93.7931	1	4	0
nad4	896	89.2405	88.4615	86.2385	95.3125	96		T	316	282	89.2405	1	109	76	88.4615	1	T	180	105	86.2385	1	T	188	149	95.3125	1	4	0
nad4	977	78.2334	79.7468	61.3208	63.7168	96.55		T	317	248	78.2334	1	102	79	79.7468	1	T	134	70	61.3208	1	T	151	83	63.7168	1	4	0
nad4	1010	92.4939	98.9899	85.8209	80.7018	96.97		T	413	382	92.4939	1	122	105	98.9899	1	T	185	123	85.8209	1	T	158	99	80.7018	1	4	0
nad4	1033	96.6587	98.1481	92.4658	90.7563	97.96		T	419	405	96.6587	1	133	113	98.1481	1	T	207	144	92.4658	1	T	166	122	90.7563	1	4	0
nad4	1101	42.4074	61.0619	46.9231	59.5238	84.68		T	540	229	42.4074	1	167	81	61.0619	1	T	197	67	46.9231	1	T	180	84	59.5238	1	4	0
nad4	1129	89.0909	93.6	84.7328	84.6667	97.52		T	660	588	89.0909	1	178	147	93.6	1	T	188	119	84.7328	1	T	214	148	84.6667	1	4	0
nad4	1148	85.2986	88	75.5396	79.6053	90		T	653	557	85.2986	1	184	145	88	1	T	196	112	75.5396	1	T	226	148	79.6053	1	4	0
nad4	1151	86.4048	90.4	79.7101	86.8421	94.53		T	662	572	86.4048	1	184	151	90.4	1	T	195	117	79.7101	1	T	226	159	86.8421	1	4	0
nad4	1172	95.9641	91.2281	76.6234	87.8788	96.95		T	669	642	95.9641	1	157	135	91.2281	1	T	201	121	76.6234	1	T	182	138	87.8788	1	4	0
nad4	1211	88.6872	89.5238	72	83.3333	83.05		T	716	635	88.6872	1	134	118	89.5238	1	T	161	92	72	1	T	137	102	83.3333	1	4	0
nad4	1355	89.8263	95.3775	80.4878	83.6601	93.07		T	1209	1086	89.8263	1	1073	935	95.3775	1	T	137	71	80.4878	1	T	207	146	83.6601	1	4	0
nad4	1373	89.909	97.856	52.0548	85.6115	80		T	1209	1087	89.909	1	1107	983	97.856	1	T	106	39	52.0548	1	T	181	135	85.6115	1	4	0
nad4	1405	99.3069	98.941	98.4848	97.5758	100		T	1010	1003	99.3069	1	1179	1016	98.941	1	T	115	71	98.4848	1	T	261	201	97.5758	1	4	0
nad4	1417	97.2136	95.764	88.8889	92.3497	92		T	969	942	97.2136	1	1081	898	95.764	1	T	155	80	88.8889	1	T	317	221	92.3497	1	4	0
nad4	1433	94.8052	95.9283	72.5	89.6175	94.23		T	847	803	94.8052	1	938	780	95.9283	1	T	152	64	72.5	1	T	328	219	89.6175	1	4	0
nad4	1438	99.4674	97.7032	83.3333	86.7052	92.08		T	751	747	99.4674	1	859	727	97.7032	1	T	149	72	83.3333	1	T	317	204	86.7052	1	4	0
nad4L	21	83.5443		45.4545	87.5	71.93		T	79	66	83.5443	1	12				T	41	10	45.4545	1	T	32	15	87.5	1	3	1
nad4L	86	93.1624	20	71.875	85.3659	95		T	234	218	93.1624	1	27	3	20	0.999994	T	65	26	71.875	1	T	69	43	85.3659	1	4	0
nad4L	100	85.2941	27.7778	61.5385	74.4681	94.23		T	238	203	85.2941	1	33	8	27.7778	1	T	60	19	61.5385	1	T	80	41	74.4681	1	4	0
nad4L	197	20.0565	22.5806	24	21.3115	93.75		T	354	71	20.0565	1	136	11	22.5806	1	T	272	19	24	1	T	180	15	21.3115	1	4	0
nad4L	200	13.2075		22.3684	29.5082		unspecific--> exclude	T	371	49	13.2075	1	137				T	265	22	22.3684	1	T	171	25	29.5082	1	3	1
nad4L	252				11.7647		ok	C	268				145				C	173				T	96	6	11.7647	1	1	3
nad5	155	70.3812	65.2174	72.7891	78.5714	94.44		T	341	240	70.3812	1	115	23	65.2174	1	T	694	122	72.7891	1	T	209	100	78.5714	1	4	0
nad5	358	94.8949	81.8182	80.1205	92.9134	94		T	333	316	94.8949	1	44	30	81.8182	1	T	288	139	80.1205	1	T	191	144	92.9134	1	4	0
nad5	374	93.3131	66.6667	57.3604	89.1304	88.66		T	329	307	93.3131	1	45	26	66.6667	1	T	328	120	57.3604	1	T	212	151	89.1304	1	4	0
nad5	398	96.2733	57.8947	73.3607	91.3907	92.31		T	322	310	96.2733	1	53	29	57.8947	1	T	358	196	73.3607	1	T	223	163	91.3907	1	4	0
nad5	539	96.2704	70.4918	54.0084	90.8571	83.53		T	429	413	96.2704	1	102	68	70.4918	1	T	286	136	54.0084	1	T	244	190	90.8571	1	4	0
nad5	548	85.5696	55	36.6379	89.5954	88.1		T	395	338	85.5696	1	96	48	55	1	T	285	91	36.6379	1	T	223	184	89.5954	1	4	0
nad5	553	90.027	50	58.2609	82.1429	79.57		T	371	334	90.027	1	87	40	50	1	T	281	144	58.2609	1	T	216	164	82.1429	1	4	0
nad5	608	87.6676	46.2963	56.746	86.7769	85		T	373	327	87.6676	1	60	27	46.2963	1	T	298	153	56.746	1	T	154	121	86.7769	1	4	0
nad5	629	93.1232	80	61.6487	86.6667	94.5		T	349	325	93.1232	1	59	45	80	1	T	324	179	61.6487	1	T	178	139	86.6667	1	4	0
nad5	676	96.5333	73.5849	75.5319	96.6102	96.67		T	375	362	96.5333	1	62	43	73.5849	1	T	323	218	75.5319	1	T	155	136	96.6102	1	4	0
nad5	713	94.4444	68.6047	58.6614	89.7196	88.06		T	396	374	94.4444	1	113	73	68.6047	1	T	287	150	58.6614	1	T	128	107	89.7196	1	4	0
nad5	725	95	80.8989	63.5628	91	93.53		T	400	380	95	1	128	96	80.8989	1	T	287	162	63.5628	1	T	118	99	91	1	4	0
nad5	764	95.0413	75.5319	61.2648	83.1683	93.33		T	363	345	95.0413	1	122	89	75.5319	1	T	291	164	61.2648	1	T	127	91	83.1683	1	4	0
nad5	1310	92.7928	89.1304	72.4138	89.0909	94.74		T	333	309	92.7928	1	135	102	89.1304	1	T	264	129	72.4138	1	T	160	122	89.0909	1	4	0
nad5	1490	98.2673	93.2203	98.5816	99.1379	100		T	404	397	98.2673	1	88	59	93.2203	1	T	201	144	98.5816	1	T	199	138	99.1379	1	4	0
nad5	1550	82.5427	86.6667	84.252	82.1138	92.91		T	527	435	82.5427	1	52	39	86.6667	1	T	187	113	84.252	1	T	183	119	82.1138	1	4	0
nad5	1580	81.1518	72.9167	61.6438	88.806	86.21		T	573	465	81.1518	1	67	43	72.9167	1	T	203	97	61.6438	1	T	211	150	88.806	1	4	0
nad5	1589	88.1603	86.8852	93.7063	90.5109	93.42		T	549	484	88.1603	1	79	64	86.8852	1	T	196	146	93.7063	1	T	214	156	90.5109	1	4	0
nad5	1610	89.0311	86.3636	87.1622	94.697	93.2		T	547	487	89.0311	1	106	83	86.3636	1	T	195	137	87.1622	1	T	185	145	94.697	1	4	0
nad5	1695	23.1481				11.56		T	432	100	23.1481	1	206				C	232				C	201				1	3
nad5	1740		14.8649			15.09		C	524				222	32	14.8649	1	C	280				C	221				1	3
nad5	1895	97.3039	87.5	94.5578	98.1595	99.12		T	408	397	97.3039	1	77	42	87.5	1	T	242	157	94.5578	1	T	288	224	98.1595	1	4	0
nad5	1916	93.8462	83.3333	94.8529	96.6216	95.24		T	390	366	93.8462	1	81	36	83.3333	1	T	215	142	94.8529	1	T	263	193	96.6216	1	4	0
nad5	1918	95.3247	100	93.4783	95.935	95.24		T	385	367	95.3247	1	81	46	100	1	T	216	141	93.4783	1	T	215	159	95.935	1	4	0
nad5	1958	98.3806	100	94.7368	93.9394	100		T	247	243	98.3806	1	55	22	100	1	T	98	57	94.7368	1	T	118	69	93.9394	1	4	0
nad6	26	96.4539		84.6154	80.9524	84.78		T	141	136	96.4539	1	26				T	45	13	84.6154	1	T	58	38	80.9524	1	3	1
nad6	53	96.4706		89.4737	75.7576	94.67		T	170	164	96.4706	1	26				T	63	22	89.4737	1	T	90	55	75.7576	1	3	1
nad6	89	74.1379		77.7778	67.0732	95		T	232	172	74.1379	1	30				T	83	24	77.7778	1	T	108	57	67.0732	1	3	1
nad6	103	91.0204		85.1852	76.9231	98.21		T	245	223	91.0204	1	26				T	79	27	85.1852	1	T	102	64	76.9231	1	3	1
nad6	146	86.6667		86.1111	77.3333	97.83		T	240	208	86.6667	1	12				T	71	33	86.1111	1	T	88	62	77.3333	1	3	1
nad6	161	86.5546		77.5	73.2394	95.74		T	238	206	86.5546	1	12				T	71	33	77.5	1	T	84	58	73.2394	1	3	1
nad6	169	94.5736	81.8182	88.8889	81.5789	100		T	258	244	94.5736	1	16	11	81.8182	1	T	76	42	88.8889	1	T	89	70	81.5789	1	4	0
nad6	191	94.5525	75	96	86.25	98.21		T	257	243	94.5525	1	22	16	75	1	T	68	49	96	1	T	95	80	86.25	1	4	0
nad6	463	97.3545	85.1351	86.1111	82.8947	99.3		T	189	184	97.3545	1	101	83	85.1351	1	T	83	64	86.1111	1	T	87	65	82.8947	1	4	0
nad7	38	70.2941	72.7273	68.8889	84.4828	86.29		T	340	239	70.2941	1	68	11	72.7273	1	T	185	34	68.8889	1	T	144	64	84.4828	1	4	0
nad7	45				22.0339	24.63		C	368				72				C	212				T	147	18	22.0339	1	1	3
nad7	77	84.4156	100	82.2785	92.7536	94.62		T	462	390	84.4156	1	94	30	100	1	T	326	75	82.2785	1	T	196	103	92.7536	1	4	0
nad7	83	84.3882	95.8333	79.7468	87.8788	94.78		T	474	400	84.3882	1	94	28	95.8333	1	T	319	70	79.7468	1	T	172	85	87.8788	1	4	0
nad7	200	100	100	95.4023	98.913	100		T	507	507	100	1	57	43	100	1	T	131	88	95.4023	1	T	160	123	98.913	1	4	0
nad7	209	99.8016	100	100	100	96.3		T	504	503	99.8016	1	57	43	100	1	T	136	98	100	1	T	160	126	100	1	4	0
nad7	224	95.3287	92.1053	90.991	97.2222	98.1		T	578	551	95.3287	1	50	42	92.1053	1	T	178	105	90.991	1	T	178	132	97.2222	1	4	0
nad7	251	93.8671	77.0833	74.6154	90.6667	95.65		T	587	551	93.8671	1	54	39	77.0833	1	T	215	102	74.6154	1	T	250	169	90.6667	1	4	0
nad7	316	94.281	85.0746	72.4138	85.9551	97.79		T	612	577	94.281	1	80	62	85.0746	1	T	315	140	72.4138	1	T	287	196	85.9551	1	4	0
nad7	335	96.1715	65.7895	71.4286	81.407	96.45		T	653	628	96.1715	1	124	73	65.7895	1	T	308	139	71.4286	1	T	298	195	81.407	1	4	0
nad7	344	92.7914	63.75	65.0794	77.451	93.53		T	652	605	92.7914	1	128	74	63.75	1	T	314	132	65.0794	1	T	296	185	77.451	1	4	0
nad7	531	27.3276	12.9944	16.9139	28			T	1160	317	27.3276	1	230	27	12.9944	1	T	427	60	16.9139	1	T	357	88	28	1	4	0
nad7	533	83.9442	71.6763	78.6787	77.4545	97.2		T	1138	962	83.9442	1	224	148	71.6763	1	T	426	278	78.6787	1	T	360	252	77.4545	1	4	0
nad7	578	91.9926	70.8861	85.2547	91.844	95.89		T	1074	988	91.9926	1	198	126	70.8861	1	T	511	345	85.2547	1	T	381	316	91.844	1	4	0
nad7	679	91.8203	62.1622	79.4118	89.3023	94.4		T	868	797	91.8203	1	50	26	62.1622	1	T	385	259	79.4118	1	T	303	239	89.3023	1	4	0
nad7	724	98.6974	93.3333	97.048	94.0594	98.28		T	998	985	98.6974	1	25	20	93.3333	1	T	358	283	97.048	1	T	283	227	94.0594	1	4	0
nad7	769	95.5193	73.6842	91.2281	88.535	88.89		T	982	938	95.5193	1	26	17	73.6842	1	T	313	220	91.2281	1	T	221	153	88.535	1	4	0
nad7	836	98.3982	81.4815	78.1726	91.875	97.71		T	874	860	98.3982	1	40	29	81.4815	1	T	304	162	78.1726	1	T	223	162	91.875	1	4	0
nad7	926	92.3409	56.25	81.25	84.1026	96.62		T	927	856	92.3409	1	79	44	56.25	1	T	232	152	81.25	1	T	274	183	84.1026	1	4	0
nad7	963	11.1575	11.8421	20.1058	19.2708	17.99		T	959	107	11.1575	1	108	12	11.8421	1	T	305	38	20.1058	1	T	288	40	19.2708	1	4	0
nad7	1050	71.1844	34.5238	69.0476	82.7338	91.33		T	819	583	71.1844	1	137	39	34.5238	1	T	290	90	69.0476	1	T	198	129	82.7338	1	4	0
nad7	1057	92.5121	54.878	83.6066	93.4307	95.06		T	828	766	92.5121	1	136	59	54.878	1	T	268	107	83.6066	1	T	193	141	93.4307	1	4	0
nad7	1079	92.7318	73.6111	74	94.0741	98.19		T	798	740	92.7318	1	121	60	73.6111	1	T	201	79	74	1	T	219	141	94.0741	1	4	0
nad7	1088	92.4403	61.1111	74.1071	90.1515	97.08		T	754	697	92.4403	1	133	59	61.1111	1	T	220	88	74.1071	1	T	220	134	90.1515	1	4	0
nad7	1103	93.5743	67.6923	72.807	90.7143	95.43		T	747	699	93.5743	1	127	58	67.6923	1	T	208	89	72.807	1	T	251	147	90.7143	1	4	0
nad7	1124	96.7341	56.6038	84.6154	89.0625	92.81		T	643	622	96.7341	1	108	42	56.6038	1	T	219	122	84.6154	1	T	262	147	89.0625	1	4	0
nad9	92	68.6813	31.5789	27.4809	49.0385	82.35		T	182	125	68.6813	1	88	21	31.5789	1	T	318	38	27.4809	1	T	147	60	49.0385	1	4	0
nad9	298	67.4419	18.4502	44.0476	63.3929	77.34		T	387	261	67.4419	1	386	71	18.4502	1	T	496	192	44.0476	1	T	148	73	63.3929	1	4	0
nad9	328	64.3068	14.8649	39.4737	42.735	78.99		T	339	218	64.3068	1	467	63	14.8649	1	T	471	159	39.4737	1	T	163	55	42.735	1	4	0
nad9	439	65.1917	12.1581	32.7485	53.0769	88.89		T	339	221	65.1917	1	583	47	12.1581	1	T	525	120	32.7485	1	T	190	81	53.0769	1	4	0
rpl10	155	77.0181	82.5758	72.2513	76.7442	92.63		T	1214	935	77.0181	1	170	124	82.5758	1	T	449	154	72.2513	1	T	126	70	76.7442	1	4	0
rpl16	108	64.3068	76.8692	40.7407	53.2468			T	339	218	64.3068	1	537	341	76.8692	1	T	118	24	40.7407	1	T	111	43	53.2468	1	4	0
rpl16	110	66.7665	89.2523	48.1481	83.5443			T	334	223	66.7665	1	532	398	89.2523	1	T	108	30	48.1481	1	T	111	68	83.5443	1	4	0
rpl16	214	72.1477	90.6746	53.3981	82.4818			T	298	215	72.1477	1	631	521	90.6746	1	T	140	57	53.3981	1	T	180	131	82.4818	1	4	0
rpl16	383	77.4648	37.2093	80.8219	68.1818			T	142	110	77.4648	1	66	21	37.2093	1	T	111	62	80.8219	1	T	90	45	68.1818	1	4	0
rpl16	389	48.3607	23.8095	48.4848	65.4545			T	122	59	48.3607	1	64	10	23.8095	1	T	100	32	48.4848	1	T	77	36	65.4545	1	4	0
rpl2	113				27.907		unspecific--> exclude	C	225				262				C	424				T	370	53	27.907	1	1	3
rpl2	118				18.1102		unspecific--> exclude	C	215				262				C	449				T	380	28	18.1102	1	1	3
rps1	45	24.3421	25.0936	14.8148		20.9		T	152	37	24.3421	1	901	81	25.0936	1	T	137	12	14.8148	1	C	75				3	1
rps12	196	99.1892	82.9545	89.2216	95.5752	100		T	370	367	99.1892	1	218	168	82.9545	1	T	247	157	89.2216	1	T	164	127	95.5752	1	4	0
rps12	269	97.8916	72.8261	74.1497	94.7368	97.87		T	332	325	97.8916	1	190	100	72.8261	1	T	256	116	74.1497	1	T	158	115	94.7368	1	4	0
rps12	284	91.5858	66.6667	76.087	97.0297	95.83		T	309	283	91.5858	1	176	83	66.6667	1	T	287	112	76.087	1	T	168	121	97.0297	1	4	0
rps3	64	100	100	100		100		T	115	115	100	1	22	14	100	1	T	29	13	100	1	C	36				3	1
rps3	172	10.0671					ok	T	149	15	10.0671	1	100				C	151				C	93				1	3
rps3	213		12.5	13.6986	12.5	12.4		C	127				143	17	12.5	1	T	163	10	13.6986	1	T	139	12	12.5	1	3	1
rps3	550		12.6984				ok	C	197				107	10	12.6984	1	C	151				C	141				1	3
rps3	1307			11.8812	15.873			C	697				398				T	504	29	11.8812	1	T	235	29	15.873	1	2	2
rps3	1567	81.1297	75.1241	71.9424	91.6667	84.81		T	779	632	81.1297	1	3041	2171	75.1241	1	T	191	120	71.9424	1	T	196	171	91.6667	1	4	0
rps3	1598	94.849	97.9811	87.1212	93.8053	98.28		T	563	534	94.849	1	1841	1638	97.9811	1	T	164	125	87.1212	1	T	154	137	93.8053	1	4	0
rps4	8			15			ok	C	95				30				T	31	3	15	0.9999	C	20				1	3
rps4	163				43.3333		unspecific--> exclude	C	334				54				C	158				T	152	57	43.3333	1	1	3
rps4	210	10.9756					ok	T	328	36	10.9756	1	62				C	171				C	188				1	3
rps4	223			36.7347	66.6667		unspecific--> exclude	C	325				60				T	149	39	36.7347	1	T	183	84	66.6667	1	2	2
rps4	370			13.0841	47.6923		unspecific--> exclude	C	255				81				T	152	14	13.0841	1	T	94	32	47.6923	1	2	2
rps4	402		30.5085				unspecific--> exclude	C	301				88	20	30.5085	1	C	125				C	87				1	3
rps4	535		15		15.2174		unspecific--> exclude	C	235				68	6	15	1	C	102				T	64	7	15.2174	1	2	2
rps4	762	14.0244			22.5806	32.35		T	164	23	14.0244	1	92				C	71				T	46	7	22.5806	1	2	2
rps4	872	85.7724	73.6842	34.2857	60.5263	87.72		T	246	211	85.7724	1	75	43	73.6842	1	T	94	13	34.2857	1	T	66	29	60.5263	1	4	0
rps4	948	12.6984					ok	T	126	16	12.6984	1	39				C	58				C	22				1	3
sdh4	194	82.7899	51.773	76.4602	89.4928	53.51		T	1656	1371	82.7899	1	353	93	51.773	1	T	1119	459	76.4602	1	T	1856	1129	89.4928	1	4	0
sdh4	203	27.8024	16.4286	16.8174	11.24	97.52		T	1356	377	27.8024	1	239	28	16.4286	1	T	1134	98	16.8174	1	T	1909	150	11.24	1	4	0
sdh4	212	47.1945		17.8506	77.9574		unspecific--> exclude	T	1301	614	47.1945	1	224				T	1114	102	17.8506	1	T	1943	1030	77.9574	1	3	1
sdh4	321	72.1008	78.75	58.2609	87.4498	15.22	unspecific--> exclude	T	595	429	72.1008	1	1154	99	78.75	1	T	782	286	58.2609	1	T	1924	1002	87.4498	1	4	0
sdh4	353	74.7967	64.2857	81.8182	85.0746	69.23		T	123	92	74.7967	1	25	9	64.2857	1	T	196	135	81.8182	1	T	95	67	85.0746	1	4	0

## Sheet: Table S3b (sites_filtered)
CDS	CDS position	Codon Position	Codon	Edited Codon	AA	Edited AA	P_trichocarpa (frequency)	P_alba (frequency)	P_davidiana (frequency)	P_tremula (frequency)	Editing extent_P_tremula (Edera et al. 2018)	P_trichocarpa (alt)	P_trichocarpa (coverage)	P_trichocarpa (count)	P_trichocarpa (frequency)	P_trichocarpa (probability)	P_alba (coverage)	P_alba (count)	P_alba (frequency)	P_alba (probability)	P_davidiana (alt)	P_davidiana (coverage)	P_davidiana (count)	P_davidiana (frequency)	P_davidiana (probability)	P_tremula (alt)	P_tremula (coverage)	P_tremula (count)	P_tremula (frequency)	P_tremula (probability)	Number Of Individual Allels Deviating From Reference	Number Of Allels Matching The Reference With Minimal Coverage
atp1	1041	3	ucC	ucu	Ser	Ser	11.3189	19.3548		14.7059	29.44	T	1016	115	11.3189	1	355	61	19.3548	1	C	364				T	481	65	14.7059	1	3	1
atp1	1425	3	auC	auu	Ile	Ile	33.998	26.7969	12.6246	10.9005	10.59	T	1003	341	33.998	1	3315	778	26.7969	1	T	381	41	12.6246	1	T	923	90	10.9005	1	4	0
atp1	1483	1	Cua	uua	Leu	Leu	11.0714					T	560	62	11.0714	1	326				C	213				C	500				1	3
atp4	382	1	Cua	uua	Leu	Leu	54.6763	51.9824	41.2587	31.5789	39.34	T	278	152	54.6763	1	372	192	51.9824	1	T	214	63	41.2587	1	T	181	45	31.5789	1	4	0
atp6	37	1	Cca	uca	Pro	Ser	100	94.1176	84.507	96	97.64	T	168	168	100	1	44	18	94.1176	1	T	173	62	84.507	1	T	103	57	96	1	4	0
atp6	173	2	cCg	cug	Pro	Leu	98.6813	80	95.3216	95.4128	97.96	T	456	449	98.6813	1	50	38	80	1	T	274	181	95.3216	1	T	181	133	95.4128	1	4	0
atp6	223	1	Cgc	ugc	Arg	Cys	98.7179	91.3043	92.5466	97.4138	99.19	T	546	539	98.7179	1	53	48	91.3043	1	T	208	159	92.5466	1	T	163	139	97.4138	1	4	0
atp6	248	2	uCg	uug	Ser	Leu	99.4329	91.0714	90.3846	97.3684	98.62	T	529	526	99.4329	1	70	62	91.0714	1	T	187	152	90.3846	1	T	155	139	97.3684	1	4	0
atp6	256	1	Cgu	ugu	Arg	Cys	100	82.7586	88	95.6522	99.32	T	524	524	100	1	71	57	82.7586	1	T	178	143	88	1	T	133	111	95.6522	1	4	0
atp6	479	2	uCa	uua	Ser	Leu	95.7237	89.7727	85.7143	98.3871	97.67	T	304	291	95.7237	1	105	91	89.7727	1	T	179	118	85.7143	1	T	101	77	98.3871	1	4	0
atp6	593	2	cCu	cuu	Pro	Leu	94.8424	80	81.8182	93.9024	100	T	349	331	94.8424	1	38	21	80	1	T	157	77	81.8182	1	T	163	94	93.9024	1	4	0
atp6	650	2	uCa	uua	Ser	Leu	99.6078		81.4815	84	98.75	T	255	254	99.6078	1	24				T	81	23	81.4815	1	T	154	55	84	1	3	1
atp6	658	1	Cau	uau	His	Tyr	100		90.4762	83.3333	100	T	220	220	100	1	22				T	72	20	90.4762	1	T	146	50	83.3333	1	3	1
atp6	665	2	uCu	uuu	Ser	Phe	99.0566		80	84.7826	100	T	212	210	99.0566	1	22				T	69	16	80	1	T	143	50	84.7826	1	3	1
atp6	674	2	uCa	uua	Ser	Leu	99.435		60	83.7838	98.73	T	177	176	99.435	1	18				T	55	9	60	1	T	114	38	83.7838	1	3	1
atp8	366	3	auC	auu	Ile	Ile	13.9535	23.5294			18.45	T	301	42	13.9535	1	57	11	23.5294	1	C	241				C	269				2	2
atp8	393	3	uuC	uuu	Phe	Phe	25	17.2414	30.8271	18.4524	31.01	T	232	58	25	1	77	6	17.2414	1	T	234	44	30.8271	1	T	249	34	18.4524	1	4	0
ccmB	28	1	Cau	uau	His	Tyr	50				90.48	T	34	17	50	1	17				C	18				C	21				1	3
ccmB	43	1	Ccc	ucc	Pro	Ser	74.359	36.3636			94.44	T	39	29	74.359	1	21	4	36.3636	1	C	25				C	30				2	2
ccmB	71	2	uCa	uua	Ser	Leu	79.1667	60	61.5385	73.3333	96.61	T	48	38	79.1667	1	37	16	60	1	T	33	8	61.5385	1	T	43	16	73.3333	1	4	0
ccmB	80	2	uCg	uug	Ser	Leu	70.8333	40	35.7143	53.3333	91.07	T	48	34	70.8333	1	37	12	40	1	T	36	5	35.7143	1	T	46	13	53.3333	1	4	0
ccmB	87	3	auC	auu	Ile	Ile				26.6667	59.65	C	49				37				C	44				T	45	6	26.6667	1	1	3
ccmB	90	3	guC	guu	Val	Val	20.4082		25	18.75	22.41	T	49	10	20.4082	1	37				T	43	4	25	1	T	43	3	18.75	0.999993	3	1
ccmB	128	2	uCa	uua	Ser	Leu	52.6316	20	35.2941	36.3636	87.04	T	38	20	52.6316	1	26	5	20	0.99999	T	41	8	35.2941	1	T	28	6	36.3636	1	4	0
ccmB	137	2	uCc	uuc	Ser	Phe	46.1538	53.3333	33.3333	63.6364	90.74	T	26	12	46.1538	1	24	10	53.3333	1	T	39	6	33.3333	1	T	25	10	63.6364	1	4	0
ccmB	139	1	Cau	uau	His	Tyr			16.6667		35.19	C	29				24				T	39	4	16.6667	0.999995	C	25				1	3
ccmB	154	1	Cgg	ugg	Trp	Trp	54.8387	53.3333	47.0588	53.8462	91.07	T	31	17	54.8387	1	24	10	53.3333	1	T	37	8	47.0588	1	T	23	7	53.8462	1	4	0
ccmB	160	1	Ccu	ucu	Pro	Ser	85.1852	46.6667	52.9412	46.1538	91.11	T	27	23	85.1852	1	22	7	46.6667	1	T	36	9	52.9412	1	T	23	6	46.1538	1	4	0
ccmB	164	2	uCg	uug	Ser	Leu	51.7241	33.3333	34.7826	46.6667	91.11	T	29	15	51.7241	1	22	5	33.3333	1	T	45	8	34.7826	1	T	22	7	46.6667	1	4	0
ccmB	172	1	Ccu	ucu	Pro	Ser	86.6667	53.3333	56.5217	75	88.64	T	30	26	86.6667	1	17	8	53.3333	1	T	42	15	56.5217	1	T	23	14	75	1	4	0
ccmB	179	2	cCu	cuu	Pro	Leu	79.1667		43.4783	62.5	82.86	T	24	19	79.1667	1	11				T	41	11	43.4783	1	T	20	11	62.5	1	3	1
ccmB	181	1	Ccc	ucc	Pro	Ser	82.6087		39.1304	66.6667	85.29	T	23	19	82.6087	1	6				T	41	10	39.1304	1	T	19	11	66.6667	1	3	1
ccmB	183	3	ccC	ccu	Pro	Pro	82.6087		26.087	33.3333	58.82	T	23	19	82.6087	1	5				T	41	7	26.087	1	T	18	5	33.3333	1	3	1
ccmB	286	1	Cgg	ugg	Trp	Trp	71.2329	33.3333	40.4762	80	98.28	T	73	52	71.2329	1	20	5	33.3333	1	T	52	17	40.4762	1	T	25	14	80	1	4	0
ccmB	313	1	Cgu	ugu	Arg	Cys	52.9412	17.6471	18.5185	64	90.91	T	85	45	52.9412	1	21	3	17.6471	0.999841	T	70	12	18.5185	1	T	35	18	64	1	4	0
ccmB	324	3	ccC	ccu	Pro	Pro	13.0952					T	84	11	13.0952	1	26				C	74				C	40				1	3
ccmB	338	2	cCg	cug	Pro	Leu	63.2184	13.7931	29.0909	90.3226	92	T	87	55	63.2184	1	33	4	13.7931	1	T	74	19	29.0909	1	T	44	33	90.3226	1	4	0
ccmB	374	2	uCa	uua	Ser	Leu	80.531	63.3333	42.1053	87.0968	81.82	T	113	91	80.531	1	53	31	63.3333	1	T	74	30	42.1053	1	T	45	32	87.0968	1	4	0
ccmB	418	1	Cgu	ugu	Arg	Cys	58.7629		22.7273	69.5652	66.2	T	97	57	58.7629	1	53				T	77	13	22.7273	1	T	43	18	69.5652	1	3	1
ccmB	422	2	uCg	uug	Ser	Leu	79.5699	60	51.1628	87.5	84.72	T	93	74	79.5699	1	53	32	60	1	T	76	26	51.1628	1	T	44	24	87.5	1	4	0
ccmB	461	2	uCg	uug	Ser	Leu	51.087		26.4706	50	70.42	T	92	47	51.087	1	45				T	65	9	26.4706	1	T	18	8	50	1	3	1
ccmB	479	2	uCa	uua	Ser	Leu	20.2247		14.2857	36.3636	75.41	T	89	18	20.2247	1	46				T	62	5	14.2857	1	T	12	4	36.3636	1	3	1
ccmB	497	2	cCa	cua	Pro	Leu	20.2703		16.6667		72.97	T	74	15	20.2703	1	34				T	50	6	16.6667	1	C	4				2	2
ccmB	506	2	uCu	uuu	Ser	Phe	23.3333		30		71.05	T	60	14	23.3333	1	35				T	54	10	30	1	C	11				2	2
ccmB	508	1	Cgu	ugu	Arg	Cys	31.1475		20.6897		78.95	T	61	19	31.1475	1	36				T	52	7	20.6897	1	C	12				2	2
ccmB	545	2	uCa	uua	Ser	Leu	78	41.6667	69.2308		92.16	T	50	39	78	1	26	9	41.6667	1	T	44	19	69.2308	1	C	19				3	1
ccmB	548	2	uCg	uug	Ser	Leu	67.3469	25	26.9231		94.12	T	49	33	67.3469	1	26	5	25	0.999995	T	44	8	26.9231	1	C	19				3	1
ccmB	563	2	uCu	uuu	Ser	Phe	34.8837				88.33	T	43	15	34.8837	1	26				C	40				C	18				1	3
ccmB	566	2	cCg	cug	Pro	Leu	64.2857	36.3636	75		95	T	42	27	64.2857	1	25	7	36.3636	1	T	36	16	75	1	C	18				3	1
ccmB	590	2	uCg	uug	Ser	Leu	62.963		20		84.42	T	27	17	62.963	1	17				T	29	4	20	0.999996	C	17				2	2
ccmC	5	2	uCc	uuc	Ser	Phe	84.8485				97.01	T	66	56	84.8485	1	10				C	17				C	11				1	3
ccmC	45	3	acC	acu	Thr	Thr	85.5556		40	80	64.71	T	90	77	85.5556	1	17				T	32	9	40	1	T	26	13	80	1	3	1
ccmC	76	1	Cgg	ugg	Trp	Trp	89.0511	57.8947	55.2632	73.0769	87.23	T	137	122	89.0511	1	30	13	57.8947	1	T	54	22	55.2632	1	T	41	23	73.0769	1	4	0
ccmC	103	1	Cau	uau	His	Tyr	87.7907	76.1905	55.8824	83.3333	97.92	T	172	151	87.7907	1	32	18	76.1905	1	T	50	20	55.8824	1	T	44	32	83.3333	1	4	0
ccmC	115	1	Cgg	ugg	Trp	Trp	88.3333	70.8333	78.9474	94.1176	100	T	180	159	88.3333	1	37	21	70.8333	1	T	54	31	78.9474	1	T	52	41	94.1176	1	4	0
ccmC	133	1	Cuu	uuu	Leu	Phe	93.0233	62.5	80	93.9394	98.92	T	172	160	93.0233	1	44	23	62.5	1	T	53	29	80	1	T	50	41	93.9394	1	4	0
ccmC	161	2	cCg	cug	Pro	Leu	94	87.5	75	94.7368	100	T	200	188	94	1	40	34	87.5	1	T	49	25	75	1	T	60	46	94.7368	1	4	0
ccmC	179	2	gCg	gug	Ala	Val	95.6522	47.1698		15.8416	96.19	T	230	220	95.6522	1	107	33	47.1698	1	C	590				T	475	42	15.8416	1	3	1
ccmC	184	1	Cgg	ugg	Trp	Trp	94.0426	41.5094			91.96	T	235	221	94.0426	1	106	29	41.5094	1	C	683				C	535				2	2
ccmC	276	3	acC	acu	Thr	Thr			61.5672	50.7905		C	208				137				T	926	190	61.5672	1	T	1108	391	50.7905	1	2	2
ccmC	281	2	aCa	aua	Thr	Ile	93.7198	34.9206	13.9706		98.92	T	207	194	93.7198	1	141	32	34.9206	1	T	906	45	13.9706	1	C	1126				3	1
ccmC	331	1	Cgg	ugg	Trp	Trp	96.5	29.5082	11.1588		98.8	T	200	193	96.5	1	111	23	29.5082	1	T	528	28	11.1588	1	C	850				3	1
ccmC	395	2	uCg	uug	Ser	Leu	92.0398	52.9412		28.5714	93.24	T	201	185	92.0398	1	43	19	52.9412	1	C	153				T	208	46	28.5714	1	3	1
ccmC	399	3	uuC	uuu	Phe	Phe	78.9216	35.2941	16.4706	24.2424	79.22	T	204	161	78.9216	1	43	12	35.2941	1	T	126	15	16.4706	1	T	203	38	24.2424	1	4	0
ccmC	421	1	Cgu	ugu	Arg	Cys	91.6168		55.5556	82.3529	91.94	T	167	153	91.6168	1	23				T	36	16	55.5556	1	T	46	31	82.3529	1	3	1
ccmC	436	1	Ccu	ucu	Pro	Ser	89.9441		44	73.0769	86.96	T	179	161	89.9441	1	19				T	32	11	44	1	T	36	21	73.0769	1	3	1
ccmC	446	2	cCg	cug	Pro	Leu	88.3041		53.5714	77.7778	81.43	T	171	151	88.3041	1	18				T	32	16	53.5714	1	T	44	25	77.7778	1	3	1
ccmC	458	2	uCa	uua	Ser	Leu	86.3636		54.5455	73.0769	86.84	T	154	133	86.3636	1	16				T	38	20	54.5455	1	T	39	23	73.0769	1	3	1
ccmC	467	2	gCu	guu	Ala	Val	72.5352		60	65.2174	95.89	T	142	103	72.5352	1	16				T	40	22	60	1	T	35	17	65.2174	1	3	1
ccmC	473	2	cCg	cug	Pro	Leu	91.4062	21.4286	60.6061	72.7273	97.22	T	128	117	91.4062	1	16	3	21.4286	0.999989	T	38	22	60.6061	1	T	34	18	72.7273	1	4	0
ccmC	497	2	uCu	uuu	Ser	Phe	87.8049		92.8571	82.7586	91.67	T	164	144	87.8049	1	26				T	50	41	92.8571	1	T	56	29	82.7586	1	3	1
ccmC	521	2	uCg	uug	Ser	Leu	96.4706	42.8571	92.3077	88.5714	96.94	T	170	164	96.4706	1	23	9	42.8571	1	T	56	40	92.3077	1	T	73	37	88.5714	1	4	0
ccmC	548	2	uCu	uuu	Ser	Phe	86.6667	21.4286	82.3529	83.3333	90.91	T	150	130	86.6667	1	19	4	21.4286	0.99999	T	53	32	82.3529	1	T	74	35	83.3333	1	4	0
ccmC	568	1	Ccu	ucu	Pro	Ser	90.9774		79.3103	93.75	95.1	T	133	121	90.9774	1	21				T	45	24	79.3103	1	T	58	32	93.75	1	3	1
ccmC	575	2	cCc	cuc	Pro	Leu	87.6033	21.4286	60	83.3333	90.1	T	121	106	87.6033	1	19	4	21.4286	0.999992	T	40	15	60	1	T	57	25	83.3333	1	4	0
ccmC	605	2	uCc	uuc	Ser	Phe	44.2748	28.5714	28	60	85.25	T	131	58	44.2748	1	20	5	28.5714	1	T	40	8	28	1	T	45	17	60	1	4	0
ccmC	608	2	cCc	cuc	Pro	Leu	90.4762	38.4615	46.1538	95.6522	94.92	T	126	114	90.4762	1	20	6	38.4615	1	T	43	13	46.1538	1	T	44	27	95.6522	1	4	0
ccmC	614	2	uCa	uua	Ser	Leu	79.2793		28	95.4545	89.06	T	111	88	79.2793	1	18				T	47	8	28	1	T	44	26	95.4545	1	3	1
ccmC	619	1	Cgu	ugu	Arg	Cys	38.3178		58.3333	57.6923	89.71	T	107	41	38.3178	1	15				T	49	15	58.3333	1	T	58	19	57.6923	1	3	1
ccmC	624	3	auC	auu	Ile	Ile	12.766			16	27.85	T	94	12	12.766	1	11				C	68				T	55	4	16	1	2	2
ccmC	650	2	cCu	cuu	Pro	Leu	97.7011		56.4103	88.5714	92.98	T	87	85	97.7011	1	11				T	75	26	56.4103	1	T	70	38	88.5714	1	3	1
ccmC	656	2	cCa	cua	Pro	Leu	97.7011		66.6667	91.4286	96.36	T	87	85	97.7011	1	11				T	75	30	66.6667	1	T	71	39	91.4286	1	3	1
ccmC	673	1	Ccu	ucu	Pro	Ser	92.5		56.4103	83.3333	90.24	T	80	74	92.5	1	10				T	71	24	56.4103	1	T	73	38	83.3333	1	3	1
ccmFc	38	2	uCc	uuc	Ser	Phe	31.8182	36.3636	24		92.68	T	44	14	31.8182	1	25	4	36.3636	1	T	35	7	24	1	C	18				3	1
ccmFc	50	2	cCu	cuu	Pro	Leu	73.4694	42.8571	48.2759		90.48	T	49	36	73.4694	1	30	6	42.8571	1	T	42	15	48.2759	1	C	21				3	1
ccmFc	52	1	Cgu	ugu	Arg	Cys	73.4694	28.5714	48.2759		85.71	T	49	36	73.4694	1	31	4	28.5714	1	T	42	15	48.2759	1	C	21				3	1
ccmFc	103	1	Ccc	ucc	Pro	Ser	88.3333	48.3871	51.7241	77.7778	91.89	T	60	53	88.3333	1	50	18	48.3871	1	T	53	16	51.7241	1	T	33	17	77.7778	1	4	0
ccmFc	119	2	uCu	uuu	Ser	Phe	73.2143	67.6471	40.7407	62.5	81.48	T	56	41	73.2143	1	43	27	67.6471	1	T	48	12	40.7407	1	T	34	12	62.5	1	4	0
ccmFc	122	2	uCc	uuc	Ser	Phe	69.6429	67.6471	48.1481	81.25	88.46	T	56	39	69.6429	1	42	27	67.6471	1	T	48	14	48.1481	1	T	34	16	81.25	1	4	0
ccmFc	146	2	cCu	cuu	Pro	Leu	83.3333	67.6471	54.8387	55	83.78	T	54	45	83.3333	1	56	37	67.6471	1	T	56	18	54.8387	1	T	31	13	55	1	4	0
ccmFc	310	1	Cgu	ugu	Arg	Cys	43.6123	51.8519	46.6667	18.0556	81.54	T	227	99	43.6123	1	298	31	51.8519	1	T	151	30	46.6667	1	T	186	16	18.0556	1	4	0
ccmFc	321	3	ccC	ccu	Pro	Pro	63.6771			69.4444	10.67	T	223	142	63.6771	1	298				C	153				T	182	57	69.4444	1	2	2
ccmFc	333	3	uuC	uuu	Phe	Phe		12.963		11.2676	65.38	C	225				303	11	12.963	1	C	151				T	179	9	11.2676	1	2	2
ccmFc	334	1	Cuu	uuu	Leu	Phe	10.2222	18.5185	36.6667		37.5	T	225	23	10.2222	1	305	11	18.5185	1	T	151	23	36.6667	1	C	178				3	1
ccmFc	342	3	cuC	cuu	Leu	Leu	13.1818				12.94	T	220	29	13.1818	1	306				C	139				C	173				1	3
ccmFc	406	1	Cgu	ugu	Arg	Cys	97.1963	65	62.2449	80.5556	89.19	T	107	104	97.1963	1	67	43	65	1	T	120	65	62.2449	1	T	55	39	80.5556	1	4	0
ccmFc	744	3	auC	auu	Ile	Ile	45.7143	33.3333	18.4211	38.8889	40	T	70	32	45.7143	1	26	8	33.3333	1	T	51	7	18.4211	1	T	21	7	38.8889	1	4	0
ccmFc	793	1	Caa	uaa	Gln	Stop	12.0482					T	83	10	12.0482	1	31				C	43				C	25				1	3
ccmFc	878	2	uCu	uuu	Ser	Phe	86.9048	80.7692	92.3077	85	97.92	T	84	73	86.9048	1	48	35	80.7692	1	T	58	39	92.3077	1	T	28	21	85	1	4	0
ccmFc	1160	2	uCg	uug	Ser	Leu	77.2152	83.3333	78.125	91.4286	100	T	79	61	77.2152	1	90	72	83.3333	1	T	69	51	78.125	1	T	38	34	91.4286	1	4	0
ccmFc	1234	1	Cgg	ugg	Trp	Trp	77.5281	98	56.0976	87.5	97.62	T	89	69	77.5281	1	87	82	98	1	T	49	25	56.0976	1	T	47	39	87.5	1	4	0
ccmFc	1315	1	Cga	uga	Arg	Trp	83.7838	91.6667	73.1343	88.5714	91.3	T	37	31	83.7838	1	44	34	91.6667	1	T	85	53	73.1343	1	T	40	32	88.5714	1	4	0
ccmFn	29	2	uCg	uug	Ser	Leu	11.828					T	93	11	11.828	1	16				C	27				C	16				1	3
ccmFn	38	2	cCg	cug	Pro	Leu	88.4615	50	53.8462	100	97.01	T	104	92	88.4615	1	18	7	50	1	T	33	8	53.8462	1	T	21	15	100	1	4	0
ccmFn	98	2	cCc	cuc	Pro	Leu	82.197	61.5385	72	94.1176	92.47	T	264	217	82.197	1	50	26	61.5385	1	T	50	19	72	1	T	32	20	94.1176	1	4	0
ccmFn	118	1	Cuu	uuu	Leu	Phe	13.9683					T	315	44	13.9683	1	47				C	58				C	40				1	3
ccmFn	137	2	uCg	uug	Ser	Leu	98.7421	32.1429	76	86.3636	96.77	T	318	314	98.7421	1	40	12	32.1429	1	T	52	21	76	1	T	41	31	86.3636	1	4	0
ccmFn	142	1	Cgu	ugu	Arg	Cys	90.3537	60.7143	79.1667	76	87.91	T	311	281	90.3537	1	40	20	60.7143	1	T	54	22	79.1667	1	T	43	28	76	1	4	0
ccmFn	151	1	Ccu	ucu	Pro	Ser	90.6452	64.2857	72.7273	74.0741	91.95	T	310	281	90.6452	1	38	21	64.2857	1	T	51	19	72.7273	1	T	45	28	74.0741	1	4	0
ccmFn	248	2	uCa	uua	Ser	Leu	94.3231	84.6154	76.7442	93.3333	92.31	T	229	216	94.3231	1	27	22	84.6154	1	T	53	36	76.7442	1	T	20	18	93.3333	1	4	0
ccmFn	256	1	Cgg	ugg	Trp	Trp	96.5517	76.9231	56.8182	87.5	97.83	T	232	224	96.5517	1	27	20	76.9231	1	T	54	28	56.8182	1	T	21	18	87.5	1	4	0
ccmFn	261	3	auC	auu	Ile	Ile		11.1111				C	233				31	3	11.1111	0.999967	C	56				C	21				1	3
ccmFn	263	2	cCa	cua	Pro	Leu	94.7598	78.5714	59.5745	77.7778	95.45	T	229	217	94.7598	1	31	25	78.5714	1	T	58	31	59.5745	1	T	83	18	77.7778	1	4	0
ccmFn	279	3	uuC	uuu	Phe	Phe	30.8594	20.6897	10.2041	55.5556	60.98	T	256	79	30.8594	1	32	7	20.6897	1	T	58	5	10.2041	1	T	27	10	55.5556	1	4	0
ccmFn	283	1	Cuu	uuu	Leu	Phe	85.6031	72.4138	64.7059	80	85.37	T	257	220	85.6031	1	32	24	72.4138	1	T	59	33	64.7059	1	T	29	19	80	1	4	0
ccmFn	303	3	cuC	cuu	Leu	Leu	38.6973	13.0435				T	261	101	38.6973	1	26	3	13.0435	0.999971	C	67				C	35				2	2
ccmFn	365	2	uCg	uug	Ser	Leu	92.8854	91.8919	49.0909	83.3333	100	T	253	235	92.8854	1	46	40	91.8919	1	T	61	30	49.0909	1	T	42	31	83.3333	1	4	0
ccmFn	372	3	uuC	uuu	Phe	Phe	78.0769	56.7568	24.1935	65.3846	80	T	260	203	78.0769	1	43	21	56.7568	1	T	67	16	24.1935	1	T	45	27	65.3846	1	4	0
ccmFn	400	1	Cgu	ugu	Arg	Cys	18.5714					T	280	52	18.5714	1	56				C	74				C	46				1	3
ccmFn	453	3	ucC	ucu	Ser	Ser	15.9468					T	301	48	15.9468	1	32				C	93				C	42				1	3
ccmFn	604	1	Cau	uau	His	Tyr	23.2919		10.3448	21.7391	27.03	T	322	75	23.2919	1	14				T	67	6	10.3448	1	T	33	5	21.7391	1	3	1
ccmFn	713	2	uCa	uua	Ser	Leu	91.7949	69.2308	52.6316	72	97.62	T	195	179	91.7949	1	20	12	69.2308	1	T	57	30	52.6316	1	T	32	20	72	1	4	0
ccmFn	751	1	Cgu	ugu	Arg	Cys	88.961	85.7143	72.7273	90.9091	97.83	T	154	137	88.961	1	24	21	85.7143	1	T	57	41	72.7273	1	T	28	24	90.9091	1	4	0
ccmFn	756	3	acC	acu	Thr	Thr	12.1212	31.8182	10.9091			T	165	20	12.1212	1	25	9	31.8182	1	T	58	6	10.9091	1	C	30				3	1
ccmFn	773	2	uCa	uua	Ser	Leu	90.9091	63.6364	73.5849	96.1538	100	T	209	190	90.9091	1	24	16	63.6364	1	T	57	40	73.5849	1	T	33	28	96.1538	1	4	0
ccmFn	785	2	cCa	cua	Pro	Leu	95.9091	80.9524	76.9231	91.6667	96	T	220	211	95.9091	1	24	20	80.9524	1	T	55	40	76.9231	1	T	33	25	91.6667	1	4	0
ccmFn	800	2	uCa	uua	Ser	Leu	87.7049	77.7778	73.4694	80	92.98	T	244	214	87.7049	1	25	17	77.7778	1	T	55	36	73.4694	1	T	33	24	80	1	4	0
ccmFn	949	1	Cgc	ugc	Arg	Cys	91.0959	88.8889	64.1026	65.7143	100	T	292	266	91.0959	1	21	18	88.8889	1	T	89	54	64.1026	1	T	45	25	65.7143	1	4	0
ccmFn	999	3	cuC	cuu	Leu	Leu		11.5385			11.11	C	262				30	3	11.5385	0.999878	C	82				C	41				1	3
ccmFn	1295	2	cCa	cua	Pro	Leu	86.4198	76.1905	69.9029	72.5	97.06	T	162	140	86.4198	1	32	25	76.1905	1	T	128	81	69.9029	1	T	55	36	72.5	1	4	0
ccmFn	1312	1	Cau	uau	His	Tyr	83.5938	73.6842	73.9583	79.4118	87.3	T	128	107	83.5938	1	29	21	73.6842	1	T	114	79	73.9583	1	T	45	30	79.4118	1	4	0
ccmFn	1327	1	Cgg	ugg	Trp	Trp	80.3797	84.2105	70.0855	78.5714	100	T	158	127	80.3797	1	31	27	84.2105	1	T	134	87	70.0855	1	T	49	37	78.5714	1	4	0
ccmFn	1345	1	Cgg	ugg	Trp	Trp	83.4197	64.7059	66	71.0526	100	T	193	161	83.4197	1	24	17	64.7059	1	T	169	101	66	1	T	45	30	71.0526	1	4	0
ccmFn	1378	1	Cgg	ugg	Trp	Trp	91.8367	76.4706	78.4431	87.2727	100	T	245	225	91.8367	1	20	14	76.4706	1	T	181	136	78.4431	1	T	71	56	87.2727	1	4	0
ccmFn	1396	1	Cgu	ugu	Arg	Cys	85.5019	72.2222	62.4204	72.549	100	T	269	230	85.5019	1	21	14	72.2222	1	T	171	100	62.4204	1	T	72	43	72.549	1	4	0
ccmFn	1420	1	Cuu	uuu	Leu	Phe	40.1929		22.7642	14	22.03	T	311	125	40.1929	1	9				T	136	29	22.7642	1	T	64	8	14	1	3	1
ccmFn	1439	2	uCg	uug	Ser	Leu	90	72.7273	54.8387	67.9245	100	T	300	270	90	1	11	8	72.7273	1	T	102	53	54.8387	1	T	71	44	67.9245	1	4	0
ccmFn	1459	1	Cuu	uuu	Leu	Phe	82.1918		63.0435	64.5833	100	T	292	240	82.1918	1	9				T	105	59	63.0435	1	T	62	37	64.5833	1	3	1
ccmFn	1463	2	cCa	cua	Pro	Leu	91.7857		70.2128	84	100	T	280	257	91.7857	1	9				T	108	70	70.2128	1	T	63	49	84	1	3	1
ccmFn	1475	2	uCa	uua	Ser	Leu	86.9565		61.9565	71.7391	100	T	276	240	86.9565	1	12				T	109	61	61.9565	1	T	57	37	71.7391	1	3	1
ccmFn	1510	1	Ccc	ucc	Pro	Ser	95.5631	88	76.8421	89.7436	98.41	T	293	280	95.5631	1	32	26	88	1	T	111	78	76.8421	1	T	53	42	89.7436	1	4	0
cob	908	2	cCa	cua	Pro	Leu	95.0413	94.2857	95.1456	93.5484	100	T	242	230	95.0413	1	49	42	94.2857	1	T	118	102	95.1456	1	T	120	103	93.5484	1	4	0
cob	982	1	Cac	uac	His	Tyr	98.1818	95.3488	85.4651	95.5556	99.37	T	275	270	98.1818	1	97	92	95.3488	1	T	302	161	85.4651	1	T	129	109	95.5556	1	4	0
cob	993	3	auC	auu	Ile	Ile		11.1111				C	345				113	11	11.1111	1	C	325				C	134				1	3
cob	1084	1	Ccu	ucu	Pro	Ser	98.7603	96.6942	92.0354	97.7011	99.59	T	484	478	98.7603	1	270	195	96.6942	1	T	234	119	92.0354	1	T	146	101	97.7011	1	4	0
cob	1098	3	uuC	uuu	Phe	Phe			25.6			C	461				247				T	217	37	25.6	1	C	167				1	3
matR	32	2	uCc	uuc	Ser	Phe	15.2866				13.85	T	157	24	15.2866	1	452				C	107				C	74				1	3
mttB	14	2	cCg	cug	Pro	Leu	48.9796					T	49	24	48.9796	1	16				C	11				C	19				1	3
mttB	52	1	Cgg	ugg	Trp	Trp	65.9574			54.5455		T	94	62	65.9574	1	27				C	17				T	25	6	54.5455	1	2	2
mttB	88	1	Cgu	ugu	Arg	Cys	75.3731		60			T	134	101	75.3731	1	34				T	23	8	60	1	C	21				2	2
mttB	116	2	uCu	uuu	Ser	Phe	72.8916		72.7273			T	166	121	72.8916	1	20				T	30	11	72.7273	1	C	12				2	2
mttB	119	2	cCa	cua	Pro	Leu	61.5854		61.5385			T	164	101	61.5854	1	20				T	32	10	61.5385	1	C	11				2	2
mttB	176	2	uCa	uua	Ser	Leu	97.9487		72.2222	100		T	195	191	97.9487	1	8				T	34	17	72.2222	1	T	29	18	100	1	3	1
mttB	190	1	Ccg	ucg	Pro	Ser	85.4922		68.75	86.6667		T	193	165	85.4922	1	9				T	24	13	68.75	1	T	22	13	86.6667	1	3	1
mttB	250	1	Cau	uau	His	Tyr	84.8276		69.2308	88.2353		T	145	123	84.8276	1	6				T	20	11	69.2308	1	T	31	22	88.2353	1	3	1
mttB	316	1	Cuc	uuc	Leu	Phe	59.5238					T	84	50	59.5238	1	11				C	13				C	10				1	3
mttB	334	1	Cgc	ugc	Arg	Cys	85					T	100	85	85	1	10				C	11				C	9				1	3
mttB	339	3	uuC	uuu	Phe	Phe	12.2449					T	98	12	12.2449	1	11				C	11				C	8				1	3
mttB	341	2	uCc	uuc	Ser	Phe	64.5833					T	96	62	64.5833	1	12				C	10				C	6				1	3
mttB	364	1	Ccc	ucc	Pro	Ser	73.8636	70	36.3636	80		T	88	65	73.8636	1	13	7	70	1	T	15	5	36.3636	1	T	13	8	80	1	4	0
mttB	367	1	Cgg	ugg	Trp	Trp	60.7595	40	30	70		T	79	48	60.7595	1	12	4	40	1	T	14	4	30	0.999999	T	13	7	70	1	4	0
mttB	395	2	cCa	cua	Pro	Leu	78.4091		46.1538	76.9231		T	88	69	78.4091	1	13				T	17	7	46.1538	1	T	14	10	76.9231	1	3	1
mttB	493	1	Cca	uca	Pro	Ser	92.7928	57.1429	77.2727			T	111	103	92.7928	1	18	8	57.1429	1	T	29	19	77.2727	1	C	15				3	1
mttB	529	1	Cgu	ugu	Arg	Cys	91.195	63.6364	72.4138	86.6667		T	159	145	91.195	1	17	10	63.6364	1	T	40	25	72.4138	1	T	20	13	86.6667	1	4	0
mttB	536	2	cCa	cua	Pro	Leu	87.6623	46.1538	64.7059	94.1176		T	154	135	87.6623	1	20	8	46.1538	1	T	47	28	64.7059	1	T	22	16	94.1176	1	4	0
mttB	542	2	cCg	cug	Pro	Leu	86.8966	45.4545	65.625	88.8889		T	145	126	86.8966	1	17	7	45.4545	1	T	43	25	65.625	1	T	23	16	88.8889	1	4	0
mttB	566	2	uCc	uuc	Ser	Phe	88.8112	63.6364	73.3333	94.4444		T	143	127	88.8112	1	12	7	63.6364	1	T	65	27	73.3333	1	T	25	18	94.4444	1	4	0
mttB	598	1	Ccg	ucg	Pro	Ser	90.1961		67.6471	83.3333		T	153	138	90.1961	1	12				T	69	28	67.6471	1	T	29	18	83.3333	1	3	1
mttB	604	1	Cuc	uuc	Leu	Phe	70.5882	50	75	56.25		T	153	108	70.5882	1	13	6	50	1	T	71	32	75	1	T	26	12	56.25	1	4	0
mttB	648	3	auC	auu	Ile	Ile	91.9255	60	83.3333	84.2105		T	161	148	91.9255	1	21	10	60	1	T	70	32	83.3333	1	T	28	19	84.2105	1	4	0
mttB	655	1	Cgu	ugu	Arg	Cys	89.5522		77.7778	88.8889		T	134	120	89.5522	1	22				T	49	28	77.7778	1	T	27	19	88.8889	1	3	1
mttB	660	3	uuC	uuu	Phe	Phe	65.3846		72	50		T	130	85	65.3846	1	22				T	44	24	72	1	T	24	9	50	1	3	1
mttB	701	2	uCg	uug	Ser	Leu	72.2222		68.1818	53.3333		T	126	91	72.2222	1	21				T	49	19	68.1818	1	T	20	9	53.3333	1	3	1
nad1	125	2	uCc	uuc	Ser	Phe	91.3181	82.9099	78.4615	88.764		T	1267	1157	91.3181	1	829	617	82.9099	1	T	162	56	78.4615	1	T	138	92	88.764	1	4	0
nad1	175	1	Cgg	ugg	Trp	Trp	95.1993	95.8525	86.3158	92.2222		T	1104	1051	95.1993	1	776	494	95.8525	1	T	217	89	86.3158	1	T	135	91	92.2222	1	4	0
nad1	286	1	Cgg	ugg	Trp	Trp	90.18	86.25	86.6667	98.1481		T	611	551	90.18	1	251	71	86.25	1	T	97	57	86.6667	1	T	75	58	98.1481	1	4	0
nad1	400	1	Ccc	ucc	Pro	Ser	99.7396	100	96.9231	96.7742		T	384	383	99.7396	1	66	31	100	1	T	137	65	96.9231	1	T	161	112	96.7742	1	4	0
nad1	403	1	Cgu	ugu	Arg	Cys	96.4377	100	88.5714	91.7526		T	393	379	96.4377	1	75	37	100	1	T	149	64	88.5714	1	T	166	109	91.7526	1	4	0
nad1	410	2	uCg	uug	Ser	Leu	92.7136	88.2353	82.8947	86.7925		T	398	369	92.7136	1	77	34	88.2353	1	T	153	64	82.8947	1	T	168	113	86.7925	1	4	0
nad1	446	2	uCu	uuu	Ser	Phe	92.053	96.1538	88.6598	85.8491		T	302	278	92.053	1	50	27	96.1538	1	T	182	90	88.6598	1	T	154	102	85.8491	1	4	0
nad1	483	3	uuC	uuu	Phe	Phe	91.5129	93.1818	92.7835	86		T	271	248	91.5129	1	100	50	93.1818	1	T	179	99	92.7835	1	T	166	106	86	1	4	0
nad1	545	2	uCa	uua	Ser	Leu	93.2432	98.5075	89.6552	90.4255		T	148	138	93.2432	1	144	73	98.5075	1	T	132	83	89.6552	1	T	143	94	90.4255	1	4	0
nad1	584	2	uCu	uuu	Ser	Phe	97.7273	98.4375	100	90.7692		T	88	86	97.7273	1	151	101	98.4375	1	T	93	77	100	1	T	119	70	90.7692	1	4	0
nad1	635	2	cCa	cua	Pro	Leu	90.3553	94.1176	84.8214	83.6364		T	197	178	90.3553	1	102	70	94.1176	1	T	147	95	84.8214	1	T	77	49	83.6364	1	4	0
nad1	644	2	uCg	uug	Ser	Leu	89.9225	94.3662	90	81.9444		T	258	232	89.9225	1	161	81	94.3662	1	T	186	117	90	1	T	98	62	81.9444	1	4	0
nad1	650	2	uCu	uuu	Ser	Phe	90.4605	91.6667	90	80.9524		T	304	275	90.4605	1	165	79	91.6667	1	T	208	126	90	1	T	116	72	80.9524	1	4	0
nad1	653	2	cCa	cua	Pro	Leu	87.8698	90.2778	80.6897	75.9036		T	338	297	87.8698	1	168	77	90.2778	1	T	215	117	80.6897	1	T	112	66	75.9036	1	4	0
nad1	665	2	cCg	cug	Pro	Leu	83.9599	88	73.3766	69.0476		T	399	335	83.9599	1	174	76	88	1	T	280	119	73.3766	1	T	121	62	69.0476	1	4	0
nad1	712	1	Cgg	ugg	Trp	Trp	95.5095	86.8421	90.2439	84.7826		T	579	553	95.5095	1	155	47	86.8421	1	T	500	218	90.2439	1	T	258	155	84.7826	1	4	0
nad1	808	1	Cgg	ugg	Trp	Trp	86.9396	64.7059	74.8387	83.0508		T	513	446	86.9396	1	50	18	64.7059	1	T	325	137	74.8387	1	T	197	118	83.0508	1	4	0
nad1	838	1	Cgg	ugg	Trp	Trp	86.8766	66.6667	75.5556	76.9231		T	381	331	86.8766	1	39	15	66.6667	1	T	267	119	75.5556	1	T	166	90	76.9231	1	4	0
nad1	847	1	Ccc	ucc	Pro	Ser	86.8035	69.2308	70.0855	80		T	341	296	86.8035	1	37	14	69.2308	1	T	229	100	70.0855	1	T	139	84	80	1	4	0
nad2	26	2	uCc	uuc	Ser	Phe	80	33.3333	70.3704	56.5217	80	T	120	96	80	1	45	5	33.3333	1	T	128	19	70.3704	1	T	74	16	56.5217	1	4	0
nad2	56	2	uCc	uuc	Ser	Phe	83.8863	69.5652	78.5714	68.0851	85.53	T	211	177	83.8863	1	68	17	69.5652	1	T	228	35	78.5714	1	T	118	40	68.0851	1	4	0
nad2	252	3	uuC	uuu	Phe	Phe	11.8557					T	388	46	11.8557	1	67				C	125				C	114				1	3
nad2	262	1	Cuu	uuu	Leu	Phe		37.5	36.5079	28.7671	22.95	C	346				49	9	37.5	1	T	109	23	36.5079	1	T	108	24	28.7671	1	3	1
nad2	303	3	uuC	uuu	Phe	Phe	21.1055				21.84	T	398	84	21.1055	1	83				C	149				C	80				1	3
nad2	308	2	uCu	uuu	Ser	Phe	93.2331	95.7746	66.6667	81.9444	96	T	399	372	93.2331	1	85	74	95.7746	1	T	155	80	66.6667	1	T	87	64	81.9444	1	4	0
nad2	311	2	uCc	uuc	Ser	Phe	78.7342	97.1831	83.8983	79.4521	93.51	T	395	311	78.7342	1	87	76	97.1831	1	T	161	105	83.8983	1	T	88	63	79.4521	1	4	0
nad2	361	1	Ccu	ucu	Pro	Ser	94.7368	97.5904	63.2653	83.7209	96.23	T	475	450	94.7368	1	94	91	97.5904	1	T	126	68	63.2653	1	T	114	83	83.7209	1	4	0
nad2	367	1	Cgc	ugc	Arg	Cys	86.4333	72.8395	56.8421	72.7273	87.13	T	457	395	86.4333	1	92	69	72.8395	1	T	123	58	56.8421	1	T	118	73	72.7273	1	4	0
nad2	394	1	Cau	uau	His	Tyr	84.1603	76.25	74.5763	78.1609	82.65	T	524	441	84.1603	1	148	112	76.25	1	T	89	46	74.5763	1	T	133	86	78.1609	1	4	0
nad2	401	2	uCa	uua	Ser	Leu	89.7533	86.4198	72.5806	78.022	84	T	527	473	89.7533	1	143	120	86.4198	1	T	94	47	72.5806	1	T	140	88	78.022	1	4	0
nad2	428	2	cCu	cuu	Pro	Leu	96.6527	84.3373	66.6667	87.037	92.66	T	478	462	96.6527	1	104	80	84.3373	1	T	99	50	66.6667	1	T	157	116	87.037	1	4	0
nad2	497	2	uCg	uug	Ser	Leu	93.7669	89.7436	69.0476	90.1408	93.1	T	369	346	93.7669	1	58	39	89.7436	1	T	127	62	69.0476	1	T	99	76	90.1408	1	4	0
nad2	523	1	Ccc	ucc	Pro	Ser	95.0769	88.2353	76.1194	93.2203	95.24	T	325	309	95.0769	1	32	22	88.2353	1	T	108	57	76.1194	1	T	77	64	93.2203	1	4	0
nad2	609	3	acC	acu	Thr	Thr	28.0576	47.8261	17.0455	17.284	73.08	T	417	117	28.0576	1	137	11	47.8261	1	T	815	15	17.0455	1	T	210	14	17.284	1	4	0
nad2	782	2	uCu	uuu	Ser	Phe	82.0707	68.0851	38.6861	85.8824	97.5	T	396	325	82.0707	1	108	54	68.0851	1	T	266	55	38.6861	1	T	133	83	85.8824	1	4	0
nad2	794	2	uCa	uua	Ser	Leu	89.7311	63.8298	29.9363	76.5432	90	T	409	367	89.7311	1	112	50	63.8298	1	T	273	51	29.9363	1	T	121	68	76.5432	1	4	0
nad2	803	2	uCu	uuu	Ser	Phe	91.0486	86	73.4568	83.75	97.62	T	391	356	91.0486	1	108	67	86	1	T	251	129	73.4568	1	T	119	77	83.75	1	4	0
nad2	914	2	cCu	cuu	Pro	Leu	90.2622	73.4694	64.0625	78.75	98.85	T	267	241	90.2622	1	55	40	73.4694	1	T	249	131	64.0625	1	T	114	80	78.75	1	4	0
nad2	922	1	Cau	uau	His	Tyr	76.9517	66	39.4737	75.9494	96.55	T	269	207	76.9517	1	58	39	66	1	T	231	78	39.4737	1	T	114	78	75.9494	1	4	0
nad2	952	1	Cgu	ugu	Arg	Cys	87.1148	87.931	47.619	85.9155	98.91	T	357	311	87.1148	1	93	81	87.931	1	T	222	97	47.619	1	T	88	69	85.9155	1	4	0
nad2	956	2	aCu	auu	Thr	Ile	81.7942	77.193	32.4607	80.5556	95.7	T	379	310	81.7942	1	90	70	77.193	1	T	224	68	32.4607	1	T	94	65	80.5556	1	4	0
nad2	1052	2	uCa	uua	Ser	Leu	94.7598	78.1609	56.8862	84.507	87.61	T	458	434	94.7598	1	130	100	78.1609	1	T	205	98	56.8862	1	T	96	65	84.507	1	4	0
nad2	1121	2	uCg	uug	Ser	Leu	85.8491	67.6923	48.5294	80.3922	96.81	T	318	273	85.8491	1	83	50	67.6923	1	T	209	70	48.5294	1	T	79	47	80.3922	1	4	0
nad2	1270	1	Cgu	ugu	Arg	Cys	95.7143	94.4444	86.25	95.6522	97.62	T	350	335	95.7143	1	46	21	94.4444	1	T	144	71	86.25	1	T	79	50	95.6522	1	4	0
nad2	1292	2	gCg	gug	Ala	Val	97.5556	78.2609	92.5373	94.4444	100	T	450	439	97.5556	1	39	23	78.2609	1	T	130	62	92.5373	1	T	95	64	94.4444	1	4	0
nad2	1379	2	uCu	uuu	Ser	Phe			11.7647			C	556				73				T	149	6	11.7647	1	C	128				1	3
nad2	1394	2	uCa	uua	Ser	Leu	91.6143	65.3846	82	89.2308	92.86	T	477	437	91.6143	1	59	21	65.3846	1	T	140	43	82	1	T	118	70	89.2308	1	4	0
nad2	1397	2	uCc	uuc	Ser	Phe	92.3747	42.3077	86	92.1875	83.67	T	459	424	92.3747	1	59	14	42.3077	1	T	137	45	86	1	T	115	72	92.1875	1	4	0
nad2	1402	1	Cua	uua	Leu	Leu	50.1235	26.9231	30.6122	38.5965	62.75	T	405	203	50.1235	1	59	9	26.9231	1	T	132	17	30.6122	1	T	105	26	38.5965	1	4	0
nad2	1410	3	ccC	ccu	Pro	Pro	81.4815	25	63.8298	62.963	68.69	T	378	308	81.4815	1	54	8	25	1	T	122	32	63.8298	1	T	96	41	62.963	1	4	0
nad2	1451	2	uCa	uua	Ser	Leu	98.2143	54.5455	62.5	86.6667	100	T	168	165	98.2143	1	19	7	54.5455	1	T	49	15	62.5	1	T	51	33	86.6667	1	4	0
nad3	79	1	Cua	uua	Leu	Leu	20.678		25.641	18.4615	23.91	T	295	61	20.678	1	116				T	166	25	25.641	1	T	125	16	18.4615	1	3	1
nad4	29	2	uCu	uuu	Ser	Phe	81.5789	90.7407	51.5152	80.4348	92.45	T	190	155	81.5789	1	60	49	90.7407	1	T	76	20	51.5152	1	T	81	44	80.4348	1	4	0
nad4	44	2	cCu	cuu	Pro	Leu	95.9821	90.9091	50	94.7368	98.02	T	224	215	95.9821	1	66	50	90.9091	1	T	94	24	50	1	T	99	66	94.7368	1	4	0
nad4	74	2	aCu	auu	Thr	Ile	86.4	76.1194	65.9341	77.6699	88.76	T	375	324	86.4	1	144	93	76.1194	1	T	156	63	65.9341	1	T	168	95	77.6699	1	4	0
nad4	77	2	cCu	cuu	Pro	Leu	95.443	79.4521	68.1818	82.243	89.89	T	395	377	95.443	1	150	102	79.4521	1	T	152	64	68.1818	1	T	178	103	82.243	1	4	0
nad4	107	2	cCg	cug	Pro	Leu	87.2449	92.4051	78.7879	96.1832	97.54	T	392	342	87.2449	1	131	101	92.4051	1	T	153	86	78.7879	1	T	224	166	96.1832	1	4	0
nad4	158	2	cCu	cuu	Pro	Leu	89.6714	87.5	70.5882	88.7218	94.79	T	426	382	89.6714	1	125	92	87.5	1	T	147	77	70.5882	1	T	221	151	88.7218	1	4	0
nad4	164	2	cCu	cuu	Pro	Leu	94.7005	85.2273	58.4158	85.1562	92.94	T	434	411	94.7005	1	121	89	85.2273	1	T	138	61	58.4158	1	T	214	139	85.1562	1	4	0
nad4	166	1	Cgg	ugg	Trp	Trp	89.0558	89.7727	55.102	89.9225	97.62	T	466	415	89.0558	1	129	104	89.7727	1	T	135	56	55.102	1	T	212	147	89.9225	1	4	0
nad4	197	2	uCu	uuu	Ser	Phe	93.9759	86.3636	63.8095	86.8421	91.26	T	415	390	93.9759	1	63	53	86.3636	1	T	136	71	63.8095	1	T	180	120	86.8421	1	4	0
nad4	362	2	aCa	aua	Thr	Ile	93.9834	100	72.3077	95.6522	92.38	T	482	453	93.9834	1	56	27	100	1	T	131	54	72.3077	1	T	120	84	95.6522	1	4	0
nad4	368	2	uCu	uuu	Ser	Phe	91.0973	95.6522	76.2712	95.6522	94.12	T	483	440	91.0973	1	59	26	95.6522	1	T	124	51	76.2712	1	T	125	84	95.6522	1	4	0
nad4	376	1	Cgu	ugu	Arg	Cys	96.3907	95.6522	69.1176	91.6667	95.1	T	471	454	96.3907	1	57	25	95.6522	1	T	138	51	69.1176	1	T	121	82	91.6667	1	4	0
nad4	403	1	Cgc	ugc	Arg	Cys	94.8454	100	80.8511	96.8254	97.68	T	388	368	94.8454	1	47	20	100	1	T	114	42	80.8511	1	T	101	73	96.8254	1	4	0
nad4	433	1	Cuu	uuu	Leu	Phe	95.6811	100	66.6667	96.6667	96.92	T	301	288	95.6811	1	48	25	100	1	T	87	32	66.6667	1	T	100	72	96.6667	1	4	0
nad4	436	1	Ccc	ucc	Pro	Ser			17.7778		98.44	C	302				46				T	77	8	17.7778	1	C	95				1	3
nad4	608	2	uCa	uua	Ser	Leu	96.6926	88.7097	72.3684	85.5422	96.52	T	514	497	96.6926	1	88	57	88.7097	1	T	130	63	72.3684	1	T	134	81	85.5422	1	4	0
nad4	659	2	uCu	uuu	Ser	Phe	94.1053	91.4634	90.991	92.1569	94.4	T	475	447	94.1053	1	92	80	91.4634	1	T	132	108	90.991	1	T	142	111	92.1569	1	4	0
nad4	767	2	cCu	cuu	Pro	Leu	96.6862	85.8268	83.1933	90.1099	95.14	T	513	496	96.6862	1	172	145	85.8268	1	T	149	105	83.1933	1	T	109	87	90.1099	1	4	0
nad4	836	2	uCc	uuc	Ser	Phe	84.7059	71.5686	75	86.3014	92.42	T	425	360	84.7059	1	145	89	71.5686	1	T	164	88	75	1	T	208	150	86.3014	1	4	0
nad4	857	2	cCa	cua	Pro	Leu	97.2637	92.1569	82.7586	93.7931	98.25	T	402	391	97.2637	1	145	114	92.1569	1	T	172	104	82.7586	1	T	207	166	93.7931	1	4	0
nad4	896	2	uCa	uua	Ser	Leu	89.2405	88.4615	86.2385	95.3125	96	T	316	282	89.2405	1	109	76	88.4615	1	T	180	105	86.2385	1	T	188	149	95.3125	1	4	0
nad4	977	2	cCg	cug	Pro	Leu	78.2334	79.7468	61.3208	63.7168	96.55	T	317	248	78.2334	1	102	79	79.7468	1	T	134	70	61.3208	1	T	151	83	63.7168	1	4	0
nad4	1010	2	cCg	cug	Pro	Leu	92.4939	98.9899	85.8209	80.7018	96.97	T	413	382	92.4939	1	122	105	98.9899	1	T	185	123	85.8209	1	T	158	99	80.7018	1	4	0
nad4	1033	1	Ccu	ucu	Pro	Ser	96.6587	98.1481	92.4658	90.7563	97.96	T	419	405	96.6587	1	133	113	98.1481	1	T	207	144	92.4658	1	T	166	122	90.7563	1	4	0
nad4	1101	3	uaC	uau	Tyr	Tyr	42.4074	61.0619	46.9231	59.5238	84.68	T	540	229	42.4074	1	167	81	61.0619	1	T	197	67	46.9231	1	T	180	84	59.5238	1	4	0
nad4	1129	1	Cuc	uuc	Leu	Phe	89.0909	93.6	84.7328	84.6667	97.52	T	660	588	89.0909	1	178	147	93.6	1	T	188	119	84.7328	1	T	214	148	84.6667	1	4	0
nad4	1148	2	uCu	uuu	Ser	Phe	85.2986	88	75.5396	79.6053	90	T	653	557	85.2986	1	184	145	88	1	T	196	112	75.5396	1	T	226	148	79.6053	1	4	0
nad4	1151	2	uCu	uuu	Ser	Phe	86.4048	90.4	79.7101	86.8421	94.53	T	662	572	86.4048	1	184	151	90.4	1	T	195	117	79.7101	1	T	226	159	86.8421	1	4	0
nad4	1172	2	uCa	uua	Ser	Leu	95.9641	91.2281	76.6234	87.8788	96.95	T	669	642	95.9641	1	157	135	91.2281	1	T	201	121	76.6234	1	T	182	138	87.8788	1	4	0
nad4	1211	2	uCa	uua	Ser	Leu	88.6872	89.5238	72	83.3333	83.05	T	716	635	88.6872	1	134	118	89.5238	1	T	161	92	72	1	T	137	102	83.3333	1	4	0
nad4	1355	2	uCa	uua	Ser	Leu	89.8263	95.3775	80.4878	83.6601	93.07	T	1209	1086	89.8263	1	1073	935	95.3775	1	T	137	71	80.4878	1	T	207	146	83.6601	1	4	0
nad4	1373	2	uCc	uuc	Ser	Phe	89.909	97.856	52.0548	85.6115	80	T	1209	1087	89.909	1	1107	983	97.856	1	T	106	39	52.0548	1	T	181	135	85.6115	1	4	0
nad4	1405	1	Cgg	ugg	Trp	Trp	99.3069	98.941	98.4848	97.5758	100	T	1010	1003	99.3069	1	1179	1016	98.941	1	T	115	71	98.4848	1	T	261	201	97.5758	1	4	0
nad4	1417	1	Cac	uac	His	Tyr	97.2136	95.764	88.8889	92.3497	92	T	969	942	97.2136	1	1081	898	95.764	1	T	155	80	88.8889	1	T	317	221	92.3497	1	4	0
nad4	1433	2	cCg	cug	Pro	Leu	94.8052	95.9283	72.5	89.6175	94.23	T	847	803	94.8052	1	938	780	95.9283	1	T	152	64	72.5	1	T	328	219	89.6175	1	4	0
nad4	1438	1	Cgc	ugc	Arg	Cys	99.4674	97.7032	83.3333	86.7052	92.08	T	751	747	99.4674	1	859	727	97.7032	1	T	149	72	83.3333	1	T	317	204	86.7052	1	4	0
nad4L	21	3	uuC	uuu	Phe	Phe	83.5443		45.4545	87.5	71.93	T	79	66	83.5443	1	12				T	41	10	45.4545	1	T	32	15	87.5	1	3	1
nad4L	86	2	cCu	cuu	Pro	Leu	93.1624	20	71.875	85.3659	95	T	234	218	93.1624	1	27	3	20	0.999994	T	65	26	71.875	1	T	69	43	85.3659	1	4	0
nad4L	100	1	Cca	uca	Pro	Ser	85.2941	27.7778	61.5385	74.4681	94.23	T	238	203	85.2941	1	33	8	27.7778	1	T	60	19	61.5385	1	T	80	41	74.4681	1	4	0
nad4L	197	2	cCa	cua	Pro	Leu	20.0565	22.5806	24	21.3115	93.75	T	354	71	20.0565	1	136	11	22.5806	1	T	272	19	24	1	T	180	15	21.3115	1	4	0
nad4L	252	3	uuC	uuu	Phe	Phe				11.7647		C	268				145				C	173				T	96	6	11.7647	1	1	3
nad5	155	2	cCg	cug	Pro	Leu	70.3812	65.2174	72.7891	78.5714	94.44	T	341	240	70.3812	1	115	23	65.2174	1	T	694	122	72.7891	1	T	209	100	78.5714	1	4	0
nad5	358	1	Cuu	uuu	Leu	Phe	94.8949	81.8182	80.1205	92.9134	94	T	333	316	94.8949	1	44	30	81.8182	1	T	288	139	80.1205	1	T	191	144	92.9134	1	4	0
nad5	374	2	cCa	cua	Pro	Leu	93.3131	66.6667	57.3604	89.1304	88.66	T	329	307	93.3131	1	45	26	66.6667	1	T	328	120	57.3604	1	T	212	151	89.1304	1	4	0
nad5	398	2	uCu	uuu	Ser	Phe	96.2733	57.8947	73.3607	91.3907	92.31	T	322	310	96.2733	1	53	29	57.8947	1	T	358	196	73.3607	1	T	223	163	91.3907	1	4	0
nad5	539	2	cCu	cuu	Pro	Leu	96.2704	70.4918	54.0084	90.8571	83.53	T	429	413	96.2704	1	102	68	70.4918	1	T	286	136	54.0084	1	T	244	190	90.8571	1	4	0
nad5	548	2	uCg	uug	Ser	Leu	85.5696	55	36.6379	89.5954	88.1	T	395	338	85.5696	1	96	48	55	1	T	285	91	36.6379	1	T	223	184	89.5954	1	4	0
nad5	553	1	Cgu	ugu	Arg	Cys	90.027	50	58.2609	82.1429	79.57	T	371	334	90.027	1	87	40	50	1	T	281	144	58.2609	1	T	216	164	82.1429	1	4	0
nad5	608	2	gCc	guc	Ala	Val	87.6676	46.2963	56.746	86.7769	85	T	373	327	87.6676	1	60	27	46.2963	1	T	298	153	56.746	1	T	154	121	86.7769	1	4	0
nad5	629	2	uCu	uuu	Ser	Phe	93.1232	80	61.6487	86.6667	94.5	T	349	325	93.1232	1	59	45	80	1	T	324	179	61.6487	1	T	178	139	86.6667	1	4	0
nad5	676	1	Cuu	uuu	Leu	Phe	96.5333	73.5849	75.5319	96.6102	96.67	T	375	362	96.5333	1	62	43	73.5849	1	T	323	218	75.5319	1	T	155	136	96.6102	1	4	0
nad5	713	2	uCg	uug	Ser	Leu	94.4444	68.6047	58.6614	89.7196	88.06	T	396	374	94.4444	1	113	73	68.6047	1	T	287	150	58.6614	1	T	128	107	89.7196	1	4	0
nad5	725	2	uCa	uua	Ser	Leu	95	80.8989	63.5628	91	93.53	T	400	380	95	1	128	96	80.8989	1	T	287	162	63.5628	1	T	118	99	91	1	4	0
nad5	764	2	uCg	uug	Ser	Leu	95.0413	75.5319	61.2648	83.1683	93.33	T	363	345	95.0413	1	122	89	75.5319	1	T	291	164	61.2648	1	T	127	91	83.1683	1	4	0
nad5	1310	2	uCa	uua	Ser	Leu	92.7928	89.1304	72.4138	89.0909	94.74	T	333	309	92.7928	1	135	102	89.1304	1	T	264	129	72.4138	1	T	160	122	89.0909	1	4	0
nad5	1490	2	cCc	cuc	Pro	Leu	98.2673	93.2203	98.5816	99.1379	100	T	404	397	98.2673	1	88	59	93.2203	1	T	201	144	98.5816	1	T	199	138	99.1379	1	4	0
nad5	1550	2	aCc	auc	Thr	Ile	82.5427	86.6667	84.252	82.1138	92.91	T	527	435	82.5427	1	52	39	86.6667	1	T	187	113	84.252	1	T	183	119	82.1138	1	4	0
nad5	1580	2	uCa	uua	Ser	Leu	81.1518	72.9167	61.6438	88.806	86.21	T	573	465	81.1518	1	67	43	72.9167	1	T	203	97	61.6438	1	T	211	150	88.806	1	4	0
nad5	1589	2	uCu	uuu	Ser	Phe	88.1603	86.8852	93.7063	90.5109	93.42	T	549	484	88.1603	1	79	64	86.8852	1	T	196	146	93.7063	1	T	214	156	90.5109	1	4	0
nad5	1610	2	cCc	cuc	Pro	Leu	89.0311	86.3636	87.1622	94.697	93.2	T	547	487	89.0311	1	106	83	86.3636	1	T	195	137	87.1622	1	T	185	145	94.697	1	4	0
nad5	1695	3	uuC	uuu	Phe	Phe	23.1481				11.56	T	432	100	23.1481	1	206				C	232				C	201				1	3
nad5	1740	3	uuC	uuu	Phe	Phe		14.8649			15.09	C	524				222	32	14.8649	1	C	280				C	221				1	3
nad5	1895	2	uCa	uua	Ser	Leu	97.3039	87.5	94.5578	98.1595	99.12	T	408	397	97.3039	1	77	42	87.5	1	T	242	157	94.5578	1	T	288	224	98.1595	1	4	0
nad5	1916	2	uCu	uuu	Ser	Phe	93.8462	83.3333	94.8529	96.6216	95.24	T	390	366	93.8462	1	81	36	83.3333	1	T	215	142	94.8529	1	T	263	193	96.6216	1	4	0
nad5	1918	1	Cgu	ugu	Arg	Cys	95.3247	100	93.4783	95.935	95.24	T	385	367	95.3247	1	81	46	100	1	T	216	141	93.4783	1	T	215	159	95.935	1	4	0
nad5	1958	2	uCg	uug	Ser	Leu	98.3806	100	94.7368	93.9394	100	T	247	243	98.3806	1	55	22	100	1	T	98	57	94.7368	1	T	118	69	93.9394	1	4	0
nad6	26	2	cCu	cuu	Pro	Leu	96.4539		84.6154	80.9524	84.78	T	141	136	96.4539	1	26				T	45	13	84.6154	1	T	58	38	80.9524	1	3	1
nad6	53	2	gCa	gua	Ala	Val	96.4706		89.4737	75.7576	94.67	T	170	164	96.4706	1	26				T	63	22	89.4737	1	T	90	55	75.7576	1	3	1
nad6	89	2	uCc	uuc	Ser	Phe	74.1379		77.7778	67.0732	95	T	232	172	74.1379	1	30				T	83	24	77.7778	1	T	108	57	67.0732	1	3	1
nad6	103	1	Cgc	ugc	Arg	Cys	91.0204		85.1852	76.9231	98.21	T	245	223	91.0204	1	26				T	79	27	85.1852	1	T	102	64	76.9231	1	3	1
nad6	146	2	uCc	uuc	Ser	Phe	86.6667		86.1111	77.3333	97.83	T	240	208	86.6667	1	12				T	71	33	86.1111	1	T	88	62	77.3333	1	3	1
nad6	161	2	cCa	cua	Pro	Leu	86.5546		77.5	73.2394	95.74	T	238	206	86.5546	1	12				T	71	33	77.5	1	T	84	58	73.2394	1	3	1
nad6	169	1	Cau	uau	His	Tyr	94.5736	81.8182	88.8889	81.5789	100	T	258	244	94.5736	1	16	11	81.8182	1	T	76	42	88.8889	1	T	89	70	81.5789	1	4	0
nad6	191	2	uCa	uua	Ser	Leu	94.5525	75	96	86.25	98.21	T	257	243	94.5525	1	22	16	75	1	T	68	49	96	1	T	95	80	86.25	1	4	0
nad6	463	1	Ccu	ucu	Pro	Ser	97.3545	85.1351	86.1111	82.8947	99.3	T	189	184	97.3545	1	101	83	85.1351	1	T	83	64	86.1111	1	T	87	65	82.8947	1	4	0
nad7	38	2	uCg	uug	Ser	Leu	70.2941	72.7273	68.8889	84.4828	86.29	T	340	239	70.2941	1	68	11	72.7273	1	T	185	34	68.8889	1	T	144	64	84.4828	1	4	0
nad7	45	3	uuC	uuu	Phe	Phe				22.0339	24.63	C	368				72				C	212				T	147	18	22.0339	1	1	3
nad7	77	2	uCa	uua	Ser	Leu	84.4156	100	82.2785	92.7536	94.62	T	462	390	84.4156	1	94	30	100	1	T	326	75	82.2785	1	T	196	103	92.7536	1	4	0
nad7	83	2	uCa	uua	Ser	Leu	84.3882	95.8333	79.7468	87.8788	94.78	T	474	400	84.3882	1	94	28	95.8333	1	T	319	70	79.7468	1	T	172	85	87.8788	1	4	0
nad7	200	2	uCu	uuu	Ser	Phe	100	100	95.4023	98.913	100	T	507	507	100	1	57	43	100	1	T	131	88	95.4023	1	T	160	123	98.913	1	4	0
nad7	209	2	uCa	uua	Ser	Leu	99.8016	100	100	100	96.3	T	504	503	99.8016	1	57	43	100	1	T	136	98	100	1	T	160	126	100	1	4	0
nad7	224	2	aCg	aug	Thr	Met	95.3287	92.1053	90.991	97.2222	98.1	T	578	551	95.3287	1	50	42	92.1053	1	T	178	105	90.991	1	T	178	132	97.2222	1	4	0
nad7	251	2	uCa	uua	Ser	Leu	93.8671	77.0833	74.6154	90.6667	95.65	T	587	551	93.8671	1	54	39	77.0833	1	T	215	102	74.6154	1	T	250	169	90.6667	1	4	0
nad7	316	1	Cgu	ugu	Arg	Cys	94.281	85.0746	72.4138	85.9551	97.79	T	612	577	94.281	1	80	62	85.0746	1	T	315	140	72.4138	1	T	287	196	85.9551	1	4	0
nad7	335	2	uCa	uua	Ser	Leu	96.1715	65.7895	71.4286	81.407	96.45	T	653	628	96.1715	1	124	73	65.7895	1	T	308	139	71.4286	1	T	298	195	81.407	1	4	0
nad7	344	2	uCa	uua	Ser	Leu	92.7914	63.75	65.0794	77.451	93.53	T	652	605	92.7914	1	128	74	63.75	1	T	314	132	65.0794	1	T	296	185	77.451	1	4	0
nad7	531	3	ucC	ucu	Ser	Ser	27.3276	12.9944	16.9139	28		T	1160	317	27.3276	1	230	27	12.9944	1	T	427	60	16.9139	1	T	357	88	28	1	4	0
nad7	533	2	uCc	uuc	Ser	Phe	83.9442	71.6763	78.6787	77.4545	97.2	T	1138	962	83.9442	1	224	148	71.6763	1	T	426	278	78.6787	1	T	360	252	77.4545	1	4	0
nad7	578	2	uCa	uua	Ser	Leu	91.9926	70.8861	85.2547	91.844	95.89	T	1074	988	91.9926	1	198	126	70.8861	1	T	511	345	85.2547	1	T	381	316	91.844	1	4	0
nad7	679	1	Cca	uca	Pro	Ser	91.8203	62.1622	79.4118	89.3023	94.4	T	868	797	91.8203	1	50	26	62.1622	1	T	385	259	79.4118	1	T	303	239	89.3023	1	4	0
nad7	724	1	Cau	uau	His	Tyr	98.6974	93.3333	97.048	94.0594	98.28	T	998	985	98.6974	1	25	20	93.3333	1	T	358	283	97.048	1	T	283	227	94.0594	1	4	0
nad7	769	1	Cgc	ugc	Arg	Cys	95.5193	73.6842	91.2281	88.535	88.89	T	982	938	95.5193	1	26	17	73.6842	1	T	313	220	91.2281	1	T	221	153	88.535	1	4	0
nad7	836	2	cCu	cuu	Pro	Leu	98.3982	81.4815	78.1726	91.875	97.71	T	874	860	98.3982	1	40	29	81.4815	1	T	304	162	78.1726	1	T	223	162	91.875	1	4	0
nad7	926	2	uCa	uua	Ser	Leu	92.3409	56.25	81.25	84.1026	96.62	T	927	856	92.3409	1	79	44	56.25	1	T	232	152	81.25	1	T	274	183	84.1026	1	4	0
nad7	963	3	ucC	ucu	Ser	Ser	11.1575	11.8421	20.1058	19.2708	17.99	T	959	107	11.1575	1	108	12	11.8421	1	T	305	38	20.1058	1	T	288	40	19.2708	1	4	0
nad7	1050	3	ccC	ccu	Pro	Pro	71.1844	34.5238	69.0476	82.7338	91.33	T	819	583	71.1844	1	137	39	34.5238	1	T	290	90	69.0476	1	T	198	129	82.7338	1	4	0
nad7	1057	1	Cgu	ugu	Arg	Cys	92.5121	54.878	83.6066	93.4307	95.06	T	828	766	92.5121	1	136	59	54.878	1	T	268	107	83.6066	1	T	193	141	93.4307	1	4	0
nad7	1079	2	uCu	uuu	Ser	Phe	92.7318	73.6111	74	94.0741	98.19	T	798	740	92.7318	1	121	60	73.6111	1	T	201	79	74	1	T	219	141	94.0741	1	4	0
nad7	1088	2	uCa	uua	Ser	Leu	92.4403	61.1111	74.1071	90.1515	97.08	T	754	697	92.4403	1	133	59	61.1111	1	T	220	88	74.1071	1	T	220	134	90.1515	1	4	0
nad7	1103	2	uCu	uuu	Ser	Phe	93.5743	67.6923	72.807	90.7143	95.43	T	747	699	93.5743	1	127	58	67.6923	1	T	208	89	72.807	1	T	251	147	90.7143	1	4	0
nad7	1124	2	cCa	cua	Pro	Leu	96.7341	56.6038	84.6154	89.0625	92.81	T	643	622	96.7341	1	108	42	56.6038	1	T	219	122	84.6154	1	T	262	147	89.0625	1	4	0
nad9	92	2	uCu	uuu	Ser	Phe	68.6813	31.5789	27.4809	49.0385	82.35	T	182	125	68.6813	1	88	21	31.5789	1	T	318	38	27.4809	1	T	147	60	49.0385	1	4	0
nad9	298	1	Ccg	ucg	Pro	Ser	67.4419	18.4502	44.0476	63.3929	77.34	T	387	261	67.4419	1	386	71	18.4502	1	T	496	192	44.0476	1	T	148	73	63.3929	1	4	0
nad9	328	1	Cgg	ugg	Trp	Trp	64.3068	14.8649	39.4737	42.735	78.99	T	339	218	64.3068	1	467	63	14.8649	1	T	471	159	39.4737	1	T	163	55	42.735	1	4	0
nad9	439	1	Cuu	uuu	Leu	Phe	65.1917	12.1581	32.7485	53.0769	88.89	T	339	221	65.1917	1	583	47	12.1581	1	T	525	120	32.7485	1	T	190	81	53.0769	1	4	0
rpl10	155	2	cCa	cua	Pro	Leu	77.0181	82.5758	72.2513	76.7442	92.63	T	1214	935	77.0181	1	170	124	82.5758	1	T	449	154	72.2513	1	T	126	70	76.7442	1	4	0
rpl16	108	3	ggC	ggu	Gly	Gly	64.3068	76.8692	40.7407	53.2468		T	339	218	64.3068	1	537	341	76.8692	1	T	118	24	40.7407	1	T	111	43	53.2468	1	4	0
rpl16	110	2	aCu	auu	Thr	Ile	66.7665	89.2523	48.1481	83.5443		T	334	223	66.7665	1	532	398	89.2523	1	T	108	30	48.1481	1	T	111	68	83.5443	1	4	0
rpl16	214	1	Cuc	uuc	Leu	Phe	72.1477	90.6746	53.3981	82.4818		T	298	215	72.1477	1	631	521	90.6746	1	T	140	57	53.3981	1	T	180	131	82.4818	1	4	0
rpl16	383	2	cCa	cua	Pro	Leu	77.4648	37.2093	80.8219	68.1818		T	142	110	77.4648	1	66	21	37.2093	1	T	111	62	80.8219	1	T	90	45	68.1818	1	4	0
rpl16	389	2	uCg	uug	Ser	Leu	48.3607	23.8095	48.4848	65.4545		T	122	59	48.3607	1	64	10	23.8095	1	T	100	32	48.4848	1	T	77	36	65.4545	1	4	0
rps1	45	3	ucC	ucu	Ser	Ser	24.3421	25.0936	14.8148		20.9	T	152	37	24.3421	1	901	81	25.0936	1	T	137	12	14.8148	1	C	75				3	1
rps12	196	1	Cac	uac	His	Tyr	99.1892	82.9545	89.2216	95.5752	100	T	370	367	99.1892	1	218	168	82.9545	1	T	247	157	89.2216	1	T	164	127	95.5752	1	4	0
rps12	269	2	uCg	uug	Ser	Leu	97.8916	72.8261	74.1497	94.7368	97.87	T	332	325	97.8916	1	190	100	72.8261	1	T	256	116	74.1497	1	T	158	115	94.7368	1	4	0
rps12	284	2	uCc	uuc	Ser	Phe	91.5858	66.6667	76.087	97.0297	95.83	T	309	283	91.5858	1	176	83	66.6667	1	T	287	112	76.087	1	T	168	121	97.0297	1	4	0
rps3	64	1	Cgg	ugg	Trp	Trp	100	100	100		100	T	115	115	100	1	22	14	100	1	T	29	13	100	1	C	36				3	1
rps3	172	1	Cua	uua	Leu	Leu	10.0671					T	149	15	10.0671	1	100				C	151				C	93				1	3
rps3	213	3	ccC	ccu	Pro	Pro		12.5	13.6986	12.5	12.4	C	127				143	17	12.5	1	T	163	10	13.6986	1	T	139	12	12.5	1	3	1
rps3	550	1	Cug	uug	Leu	Leu		12.6984				C	197				107	10	12.6984	1	C	151				C	141				1	3
rps3	1307	2	uCg	uug	Ser	Leu			11.8812	15.873		C	697				398				T	504	29	11.8812	1	T	235	29	15.873	1	2	2
rps3	1567	1	Ccu	ucu	Pro	Ser	81.1297	75.1241	71.9424	91.6667	84.81	T	779	632	81.1297	1	3041	2171	75.1241	1	T	191	120	71.9424	1	T	196	171	91.6667	1	4	0
rps3	1598	2	uCa	uua	Ser	Leu	94.849	97.9811	87.1212	93.8053	98.28	T	563	534	94.849	1	1841	1638	97.9811	1	T	164	125	87.1212	1	T	154	137	93.8053	1	4	0
rps4	8	2	cCa	cua	Pro	Leu			15			C	95				30				T	31	3	15	0.9999	C	20				1	3
rps4	210	3	gaC	gau	Asp	Asp	10.9756					T	328	36	10.9756	1	62				C	171				C	188				1	3
rps4	762	3	auC	auu	Ile	Ile	14.0244			22.5806	32.35	T	164	23	14.0244	1	92				C	71				T	46	7	22.5806	1	2	2
rps4	872	2	uCu	uuu	Ser	Phe	85.7724	73.6842	34.2857	60.5263	87.72	T	246	211	85.7724	1	75	43	73.6842	1	T	94	13	34.2857	1	T	66	29	60.5263	1	4	0
rps4	948	3	aaC	aau	Asn	Asn	12.6984					T	126	16	12.6984	1	39				C	58				C	22				1	3
sdh4	194	2	aCu	auu	Thr	Ile	82.7899	51.773	76.4602	89.4928	53.51	T	1656	1371	82.7899	1	353	93	51.773	1	T	1119	459	76.4602	1	T	1856	1129	89.4928	1	4	0
sdh4	203	2	cCc	cuc	Pro	Leu	27.8024	16.4286	16.8174	11.24	97.52	T	1356	377	27.8024	1	239	28	16.4286	1	T	1134	98	16.8174	1	T	1909	150	11.24	1	4	0
sdh4	353	2	uCu	uuu	Ser	Phe	74.7967	64.2857	81.8182	85.0746	69.23	T	123	92	74.7967	1	25	9	64.2857	1	T	196	135	81.8182	1	T	95	67	85.0746	1	4	0

## Sheet: Table S3c (number and density)
CDS	Number of sites	Length of CDS (bp)	Density (sites/kb)
atp1	3	1524	1.9685
atp4	1	597	1.67504
atp6	11	714	15.4062
atp8	2	474	4.21941
ccmB	33	615	53.6585
ccmC	33	753	43.8247
ccmFc	19	1362	13.9501
ccmFn	39	1731	22.5303
cob	5	1182	4.23012
matR	1	1944	0.514403
mttB	26	786	33.0789
nad1	19	888	21.3964
nad2	32	1461	21.9028
nad3	1	357	2.80112
nad4	36	1488	24.1935
nad4L	5	303	16.5017
nad5	25	2001	12.4938
nad6	9	630	14.2857
nad7	26	1185	21.9409
nad9	4	573	6.9808
rpl10	1	489	2.04499
rpl16	5	417	11.9904
rps1	1	636	1.57233
rps3	7	1644	4.25791
rps4	5	969	5.15996
rps12	3	378	7.93651
sdh4	3	396	7.57576

## Sheet: Table S3d (species_comparison)
CDS	CDS position	P_trichocarpa (frequency)	P_alba (frequency)	P_davidiana (frequency)	P_tremula (frequency)		P_trichocarpa (coverage)	P_trichocarpa (count)	P_trichocarpa (frequency)	P_trichocarpa (probability)	P_alba (coverage)	P_alba (count)	P_alba (frequency)	P_alba (probability)	P_davidiana (alt)	P_davidiana (coverage)	P_davidiana (count)	P_davidiana (frequency)	P_davidiana (probability)	P_tremula (alt)	P_tremula (coverage)	P_tremula (count)	P_tremula (frequency)	P_tremula (probability)	Number Of Individual Allels Deviating From Reference	Number Of Allels Matching The Reference With Minimal Coverage
nad7	200	100	100	95.4023	98.913	T	507	507	100	1	57	43	100	1	T	131	88	95.4023	1	T	160	123	98.913	1	4	0
atp6	37	100	94.1176	84.507	96	T	168	168	100	1	44	18	94.1176	1	T	173	62	84.507	1	T	103	57	96	1	4	0
atp6	256	100	82.7586	88	95.6522	T	524	524	100	1	71	57	82.7586	1	T	178	143	88	1	T	133	111	95.6522	1	4	0
nad7	209	99.8016	100	100	100	T	504	503	99.8016	1	57	43	100	1	T	136	98	100	1	T	160	126	100	1	4	0
nad1	400	99.7396	100	96.9231	96.7742	T	384	383	99.7396	1	66	31	100	1	T	137	65	96.9231	1	T	161	112	96.7742	1	4	0
nad4	1438	99.4674	97.7032	83.3333	86.7052	T	751	747	99.4674	1	859	727	97.7032	1	T	149	72	83.3333	1	T	317	204	86.7052	1	4	0
atp6	248	99.4329	91.0714	90.3846	97.3684	T	529	526	99.4329	1	70	62	91.0714	1	T	187	152	90.3846	1	T	155	139	97.3684	1	4	0
nad4	1405	99.3069	98.941	98.4848	97.5758	T	1010	1003	99.3069	1	1179	1016	98.941	1	T	115	71	98.4848	1	T	261	201	97.5758	1	4	0
rps12	196	99.1892	82.9545	89.2216	95.5752	T	370	367	99.1892	1	218	168	82.9545	1	T	247	157	89.2216	1	T	164	127	95.5752	1	4	0
cob	1084	98.7603	96.6942	92.0354	97.7011	T	484	478	98.7603	1	270	195	96.6942	1	T	234	119	92.0354	1	T	146	101	97.7011	1	4	0
ccmFn	137	98.7421	32.1429	76	86.3636	T	318	314	98.7421	1	40	12	32.1429	1	T	52	21	76	1	T	41	31	86.3636	1	4	0
atp6	223	98.7179	91.3043	92.5466	97.4138	T	546	539	98.7179	1	53	48	91.3043	1	T	208	159	92.5466	1	T	163	139	97.4138	1	4	0
nad7	724	98.6974	93.3333	97.048	94.0594	T	998	985	98.6974	1	25	20	93.3333	1	T	358	283	97.048	1	T	283	227	94.0594	1	4	0
atp6	173	98.6813	80	95.3216	95.4128	T	456	449	98.6813	1	50	38	80	1	T	274	181	95.3216	1	T	181	133	95.4128	1	4	0
nad7	836	98.3982	81.4815	78.1726	91.875	T	874	860	98.3982	1	40	29	81.4815	1	T	304	162	78.1726	1	T	223	162	91.875	1	4	0
nad5	1958	98.3806	100	94.7368	93.9394	T	247	243	98.3806	1	55	22	100	1	T	98	57	94.7368	1	T	118	69	93.9394	1	4	0
nad5	1490	98.2673	93.2203	98.5816	99.1379	T	404	397	98.2673	1	88	59	93.2203	1	T	201	144	98.5816	1	T	199	138	99.1379	1	4	0
nad2	1451	98.2143	54.5455	62.5	86.6667	T	168	165	98.2143	1	19	7	54.5455	1	T	49	15	62.5	1	T	51	33	86.6667	1	4	0
cob	982	98.1818	95.3488	85.4651	95.5556	T	275	270	98.1818	1	97	92	95.3488	1	T	302	161	85.4651	1	T	129	109	95.5556	1	4	0
rps12	269	97.8916	72.8261	74.1497	94.7368	T	332	325	97.8916	1	190	100	72.8261	1	T	256	116	74.1497	1	T	158	115	94.7368	1	4	0
nad1	584	97.7273	98.4375	100	90.7692	T	88	86	97.7273	1	151	101	98.4375	1	T	93	77	100	1	T	119	70	90.7692	1	4	0
nad2	1292	97.5556	78.2609	92.5373	94.4444	T	450	439	97.5556	1	39	23	78.2609	1	T	130	62	92.5373	1	T	95	64	94.4444	1	4	0
nad6	463	97.3545	85.1351	86.1111	82.8947	T	189	184	97.3545	1	101	83	85.1351	1	T	83	64	86.1111	1	T	87	65	82.8947	1	4	0
nad5	1895	97.3039	87.5	94.5578	98.1595	T	408	397	97.3039	1	77	42	87.5	1	T	242	157	94.5578	1	T	288	224	98.1595	1	4	0
nad4	857	97.2637	92.1569	82.7586	93.7931	T	402	391	97.2637	1	145	114	92.1569	1	T	172	104	82.7586	1	T	207	166	93.7931	1	4	0
nad4	1417	97.2136	95.764	88.8889	92.3497	T	969	942	97.2136	1	1081	898	95.764	1	T	155	80	88.8889	1	T	317	221	92.3497	1	4	0
ccmFc	406	97.1963	65	62.2449	80.5556	T	107	104	97.1963	1	67	43	65	1	T	120	65	62.2449	1	T	55	39	80.5556	1	4	0
nad7	1124	96.7341	56.6038	84.6154	89.0625	T	643	622	96.7341	1	108	42	56.6038	1	T	219	122	84.6154	1	T	262	147	89.0625	1	4	0
nad4	608	96.6926	88.7097	72.3684	85.5422	T	514	497	96.6926	1	88	57	88.7097	1	T	130	63	72.3684	1	T	134	81	85.5422	1	4	0
nad4	767	96.6862	85.8268	83.1933	90.1099	T	513	496	96.6862	1	172	145	85.8268	1	T	149	105	83.1933	1	T	109	87	90.1099	1	4	0
nad4	1033	96.6587	98.1481	92.4658	90.7563	T	419	405	96.6587	1	133	113	98.1481	1	T	207	144	92.4658	1	T	166	122	90.7563	1	4	0
nad2	428	96.6527	84.3373	66.6667	87.037	T	478	462	96.6527	1	104	80	84.3373	1	T	99	50	66.6667	1	T	157	116	87.037	1	4	0
ccmFn	256	96.5517	76.9231	56.8182	87.5	T	232	224	96.5517	1	27	20	76.9231	1	T	54	28	56.8182	1	T	21	18	87.5	1	4	0
nad5	676	96.5333	73.5849	75.5319	96.6102	T	375	362	96.5333	1	62	43	73.5849	1	T	323	218	75.5319	1	T	155	136	96.6102	1	4	0
ccmC	521	96.4706	42.8571	92.3077	88.5714	T	170	164	96.4706	1	23	9	42.8571	1	T	56	40	92.3077	1	T	73	37	88.5714	1	4	0
nad1	403	96.4377	100	88.5714	91.7526	T	393	379	96.4377	1	75	37	100	1	T	149	64	88.5714	1	T	166	109	91.7526	1	4	0
nad4	376	96.3907	95.6522	69.1176	91.6667	T	471	454	96.3907	1	57	25	95.6522	1	T	138	51	69.1176	1	T	121	82	91.6667	1	4	0
nad5	398	96.2733	57.8947	73.3607	91.3907	T	322	310	96.2733	1	53	29	57.8947	1	T	358	196	73.3607	1	T	223	163	91.3907	1	4	0
nad5	539	96.2704	70.4918	54.0084	90.8571	T	429	413	96.2704	1	102	68	70.4918	1	T	286	136	54.0084	1	T	244	190	90.8571	1	4	0
nad7	335	96.1715	65.7895	71.4286	81.407	T	653	628	96.1715	1	124	73	65.7895	1	T	308	139	71.4286	1	T	298	195	81.407	1	4	0
nad4	44	95.9821	90.9091	50	94.7368	T	224	215	95.9821	1	66	50	90.9091	1	T	94	24	50	1	T	99	66	94.7368	1	4	0
nad4	1172	95.9641	91.2281	76.6234	87.8788	T	669	642	95.9641	1	157	135	91.2281	1	T	201	121	76.6234	1	T	182	138	87.8788	1	4	0
ccmFn	785	95.9091	80.9524	76.9231	91.6667	T	220	211	95.9091	1	24	20	80.9524	1	T	55	40	76.9231	1	T	33	25	91.6667	1	4	0
atp6	479	95.7237	89.7727	85.7143	98.3871	T	304	291	95.7237	1	105	91	89.7727	1	T	179	118	85.7143	1	T	101	77	98.3871	1	4	0
nad2	1270	95.7143	94.4444	86.25	95.6522	T	350	335	95.7143	1	46	21	94.4444	1	T	144	71	86.25	1	T	79	50	95.6522	1	4	0
nad4	433	95.6811	100	66.6667	96.6667	T	301	288	95.6811	1	48	25	100	1	T	87	32	66.6667	1	T	100	72	96.6667	1	4	0
ccmFn	1510	95.5631	88	76.8421	89.7436	T	293	280	95.5631	1	32	26	88	1	T	111	78	76.8421	1	T	53	42	89.7436	1	4	0
nad7	769	95.5193	73.6842	91.2281	88.535	T	982	938	95.5193	1	26	17	73.6842	1	T	313	220	91.2281	1	T	221	153	88.535	1	4	0
nad1	712	95.5095	86.8421	90.2439	84.7826	T	579	553	95.5095	1	155	47	86.8421	1	T	500	218	90.2439	1	T	258	155	84.7826	1	4	0
nad4	77	95.443	79.4521	68.1818	82.243	T	395	377	95.443	1	150	102	79.4521	1	T	152	64	68.1818	1	T	178	103	82.243	1	4	0
nad7	224	95.3287	92.1053	90.991	97.2222	T	578	551	95.3287	1	50	42	92.1053	1	T	178	105	90.991	1	T	178	132	97.2222	1	4	0
nad5	1918	95.3247	100	93.4783	95.935	T	385	367	95.3247	1	81	46	100	1	T	216	141	93.4783	1	T	215	159	95.935	1	4	0
nad1	175	95.1993	95.8525	86.3158	92.2222	T	1104	1051	95.1993	1	776	494	95.8525	1	T	217	89	86.3158	1	T	135	91	92.2222	1	4	0
nad2	523	95.0769	88.2353	76.1194	93.2203	T	325	309	95.0769	1	32	22	88.2353	1	T	108	57	76.1194	1	T	77	64	93.2203	1	4	0
cob	908	95.0413	94.2857	95.1456	93.5484	T	242	230	95.0413	1	49	42	94.2857	1	T	118	102	95.1456	1	T	120	103	93.5484	1	4	0
nad5	764	95.0413	75.5319	61.2648	83.1683	T	363	345	95.0413	1	122	89	75.5319	1	T	291	164	61.2648	1	T	127	91	83.1683	1	4	0
nad5	725	95	80.8989	63.5628	91	T	400	380	95	1	128	96	80.8989	1	T	287	162	63.5628	1	T	118	99	91	1	4	0
nad5	358	94.8949	81.8182	80.1205	92.9134	T	333	316	94.8949	1	44	30	81.8182	1	T	288	139	80.1205	1	T	191	144	92.9134	1	4	0
rps3	1598	94.849	97.9811	87.1212	93.8053	T	563	534	94.849	1	1841	1638	97.9811	1	T	164	125	87.1212	1	T	154	137	93.8053	1	4	0
nad4	403	94.8454	100	80.8511	96.8254	T	388	368	94.8454	1	47	20	100	1	T	114	42	80.8511	1	T	101	73	96.8254	1	4	0
atp6	593	94.8424	80	81.8182	93.9024	T	349	331	94.8424	1	38	21	80	1	T	157	77	81.8182	1	T	163	94	93.9024	1	4	0
nad4	1433	94.8052	95.9283	72.5	89.6175	T	847	803	94.8052	1	938	780	95.9283	1	T	152	64	72.5	1	T	328	219	89.6175	1	4	0
ccmFn	263	94.7598	78.5714	59.5745	77.7778	T	229	217	94.7598	1	31	25	78.5714	1	T	58	31	59.5745	1	T	83	18	77.7778	1	4	0
nad2	1052	94.7598	78.1609	56.8862	84.507	T	458	434	94.7598	1	130	100	78.1609	1	T	205	98	56.8862	1	T	96	65	84.507	1	4	0
nad2	361	94.7368	97.5904	63.2653	83.7209	T	475	450	94.7368	1	94	91	97.5904	1	T	126	68	63.2653	1	T	114	83	83.7209	1	4	0
nad4	164	94.7005	85.2273	58.4158	85.1562	T	434	411	94.7005	1	121	89	85.2273	1	T	138	61	58.4158	1	T	214	139	85.1562	1	4	0
nad6	169	94.5736	81.8182	88.8889	81.5789	T	258	244	94.5736	1	16	11	81.8182	1	T	76	42	88.8889	1	T	89	70	81.5789	1	4	0
nad6	191	94.5525	75	96	86.25	T	257	243	94.5525	1	22	16	75	1	T	68	49	96	1	T	95	80	86.25	1	4	0
nad5	713	94.4444	68.6047	58.6614	89.7196	T	396	374	94.4444	1	113	73	68.6047	1	T	287	150	58.6614	1	T	128	107	89.7196	1	4	0
ccmFn	248	94.3231	84.6154	76.7442	93.3333	T	229	216	94.3231	1	27	22	84.6154	1	T	53	36	76.7442	1	T	20	18	93.3333	1	4	0
nad7	316	94.281	85.0746	72.4138	85.9551	T	612	577	94.281	1	80	62	85.0746	1	T	315	140	72.4138	1	T	287	196	85.9551	1	4	0
nad4	659	94.1053	91.4634	90.991	92.1569	T	475	447	94.1053	1	92	80	91.4634	1	T	132	108	90.991	1	T	142	111	92.1569	1	4	0
ccmC	161	94	87.5	75	94.7368	T	200	188	94	1	40	34	87.5	1	T	49	25	75	1	T	60	46	94.7368	1	4	0
nad4	362	93.9834	100	72.3077	95.6522	T	482	453	93.9834	1	56	27	100	1	T	131	54	72.3077	1	T	120	84	95.6522	1	4	0
nad4	197	93.9759	86.3636	63.8095	86.8421	T	415	390	93.9759	1	63	53	86.3636	1	T	136	71	63.8095	1	T	180	120	86.8421	1	4	0
nad7	251	93.8671	77.0833	74.6154	90.6667	T	587	551	93.8671	1	54	39	77.0833	1	T	215	102	74.6154	1	T	250	169	90.6667	1	4	0
nad5	1916	93.8462	83.3333	94.8529	96.6216	T	390	366	93.8462	1	81	36	83.3333	1	T	215	142	94.8529	1	T	263	193	96.6216	1	4	0
nad2	497	93.7669	89.7436	69.0476	90.1408	T	369	346	93.7669	1	58	39	89.7436	1	T	127	62	69.0476	1	T	99	76	90.1408	1	4	0
nad7	1103	93.5743	67.6923	72.807	90.7143	T	747	699	93.5743	1	127	58	67.6923	1	T	208	89	72.807	1	T	251	147	90.7143	1	4	0
nad5	374	93.3131	66.6667	57.3604	89.1304	T	329	307	93.3131	1	45	26	66.6667	1	T	328	120	57.3604	1	T	212	151	89.1304	1	4	0
nad1	545	93.2432	98.5075	89.6552	90.4255	T	148	138	93.2432	1	144	73	98.5075	1	T	132	83	89.6552	1	T	143	94	90.4255	1	4	0
nad2	308	93.2331	95.7746	66.6667	81.9444	T	399	372	93.2331	1	85	74	95.7746	1	T	155	80	66.6667	1	T	87	64	81.9444	1	4	0
nad4L	86	93.1624	20	71.875	85.3659	T	234	218	93.1624	1	27	3	20	0.999994	T	65	26	71.875	1	T	69	43	85.3659	1	4	0
nad5	629	93.1232	80	61.6487	86.6667	T	349	325	93.1232	1	59	45	80	1	T	324	179	61.6487	1	T	178	139	86.6667	1	4	0
ccmC	133	93.0233	62.5	80	93.9394	T	172	160	93.0233	1	44	23	62.5	1	T	53	29	80	1	T	50	41	93.9394	1	4	0
ccmFn	365	92.8854	91.8919	49.0909	83.3333	T	253	235	92.8854	1	46	40	91.8919	1	T	61	30	49.0909	1	T	42	31	83.3333	1	4	0
nad5	1310	92.7928	89.1304	72.4138	89.0909	T	333	309	92.7928	1	135	102	89.1304	1	T	264	129	72.4138	1	T	160	122	89.0909	1	4	0
nad7	344	92.7914	63.75	65.0794	77.451	T	652	605	92.7914	1	128	74	63.75	1	T	314	132	65.0794	1	T	296	185	77.451	1	4	0
nad7	1079	92.7318	73.6111	74	94.0741	T	798	740	92.7318	1	121	60	73.6111	1	T	201	79	74	1	T	219	141	94.0741	1	4	0
nad1	410	92.7136	88.2353	82.8947	86.7925	T	398	369	92.7136	1	77	34	88.2353	1	T	153	64	82.8947	1	T	168	113	86.7925	1	4	0
nad7	1057	92.5121	54.878	83.6066	93.4307	T	828	766	92.5121	1	136	59	54.878	1	T	268	107	83.6066	1	T	193	141	93.4307	1	4	0
nad4	1010	92.4939	98.9899	85.8209	80.7018	T	413	382	92.4939	1	122	105	98.9899	1	T	185	123	85.8209	1	T	158	99	80.7018	1	4	0
nad7	1088	92.4403	61.1111	74.1071	90.1515	T	754	697	92.4403	1	133	59	61.1111	1	T	220	88	74.1071	1	T	220	134	90.1515	1	4	0
nad2	1397	92.3747	42.3077	86	92.1875	T	459	424	92.3747	1	59	14	42.3077	1	T	137	45	86	1	T	115	72	92.1875	1	4	0
nad7	926	92.3409	56.25	81.25	84.1026	T	927	856	92.3409	1	79	44	56.25	1	T	232	152	81.25	1	T	274	183	84.1026	1	4	0
nad1	446	92.053	96.1538	88.6598	85.8491	T	302	278	92.053	1	50	27	96.1538	1	T	182	90	88.6598	1	T	154	102	85.8491	1	4	0
nad7	578	91.9926	70.8861	85.2547	91.844	T	1074	988	91.9926	1	198	126	70.8861	1	T	511	345	85.2547	1	T	381	316	91.844	1	4	0
mttB	648	91.9255	60	83.3333	84.2105	T	161	148	91.9255	1	21	10	60	1	T	70	32	83.3333	1	T	28	19	84.2105	1	4	0
ccmFn	1378	91.8367	76.4706	78.4431	87.2727	T	245	225	91.8367	1	20	14	76.4706	1	T	181	136	78.4431	1	T	71	56	87.2727	1	4	0
nad7	679	91.8203	62.1622	79.4118	89.3023	T	868	797	91.8203	1	50	26	62.1622	1	T	385	259	79.4118	1	T	303	239	89.3023	1	4	0
ccmFn	713	91.7949	69.2308	52.6316	72	T	195	179	91.7949	1	20	12	69.2308	1	T	57	30	52.6316	1	T	32	20	72	1	4	0
nad2	1394	91.6143	65.3846	82	89.2308	T	477	437	91.6143	1	59	21	65.3846	1	T	140	43	82	1	T	118	70	89.2308	1	4	0
rps12	284	91.5858	66.6667	76.087	97.0297	T	309	283	91.5858	1	176	83	66.6667	1	T	287	112	76.087	1	T	168	121	97.0297	1	4	0
nad1	483	91.5129	93.1818	92.7835	86	T	271	248	91.5129	1	100	50	93.1818	1	T	179	99	92.7835	1	T	166	106	86	1	4	0
ccmC	473	91.4062	21.4286	60.6061	72.7273	T	128	117	91.4062	1	16	3	21.4286	0.999989	T	38	22	60.6061	1	T	34	18	72.7273	1	4	0
nad1	125	91.3181	82.9099	78.4615	88.764	T	1267	1157	91.3181	1	829	617	82.9099	1	T	162	56	78.4615	1	T	138	92	88.764	1	4	0
mttB	529	91.195	63.6364	72.4138	86.6667	T	159	145	91.195	1	17	10	63.6364	1	T	40	25	72.4138	1	T	20	13	86.6667	1	4	0
nad4	368	91.0973	95.6522	76.2712	95.6522	T	483	440	91.0973	1	59	26	95.6522	1	T	124	51	76.2712	1	T	125	84	95.6522	1	4	0
ccmFn	949	91.0959	88.8889	64.1026	65.7143	T	292	266	91.0959	1	21	18	88.8889	1	T	89	54	64.1026	1	T	45	25	65.7143	1	4	0
nad2	803	91.0486	86	73.4568	83.75	T	391	356	91.0486	1	108	67	86	1	T	251	129	73.4568	1	T	119	77	83.75	1	4	0
ccmFn	773	90.9091	63.6364	73.5849	96.1538	T	209	190	90.9091	1	24	16	63.6364	1	T	57	40	73.5849	1	T	33	28	96.1538	1	4	0
ccmFn	151	90.6452	64.2857	72.7273	74.0741	T	310	281	90.6452	1	38	21	64.2857	1	T	51	19	72.7273	1	T	45	28	74.0741	1	4	0
ccmC	608	90.4762	38.4615	46.1538	95.6522	T	126	114	90.4762	1	20	6	38.4615	1	T	43	13	46.1538	1	T	44	27	95.6522	1	4	0
nad1	650	90.4605	91.6667	90	80.9524	T	304	275	90.4605	1	165	79	91.6667	1	T	208	126	90	1	T	116	72	80.9524	1	4	0
nad1	635	90.3553	94.1176	84.8214	83.6364	T	197	178	90.3553	1	102	70	94.1176	1	T	147	95	84.8214	1	T	77	49	83.6364	1	4	0
ccmFn	142	90.3537	60.7143	79.1667	76	T	311	281	90.3537	1	40	20	60.7143	1	T	54	22	79.1667	1	T	43	28	76	1	4	0
nad2	914	90.2622	73.4694	64.0625	78.75	T	267	241	90.2622	1	55	40	73.4694	1	T	249	131	64.0625	1	T	114	80	78.75	1	4	0
nad1	286	90.18	86.25	86.6667	98.1481	T	611	551	90.18	1	251	71	86.25	1	T	97	57	86.6667	1	T	75	58	98.1481	1	4	0
nad5	553	90.027	50	58.2609	82.1429	T	371	334	90.027	1	87	40	50	1	T	281	144	58.2609	1	T	216	164	82.1429	1	4	0
ccmFn	1439	90	72.7273	54.8387	67.9245	T	300	270	90	1	11	8	72.7273	1	T	102	53	54.8387	1	T	71	44	67.9245	1	4	0
nad1	644	89.9225	94.3662	90	81.9444	T	258	232	89.9225	1	161	81	94.3662	1	T	186	117	90	1	T	98	62	81.9444	1	4	0
nad4	1373	89.909	97.856	52.0548	85.6115	T	1209	1087	89.909	1	1107	983	97.856	1	T	106	39	52.0548	1	T	181	135	85.6115	1	4	0
nad4	1355	89.8263	95.3775	80.4878	83.6601	T	1209	1086	89.8263	1	1073	935	95.3775	1	T	137	71	80.4878	1	T	207	146	83.6601	1	4	0
nad2	401	89.7533	86.4198	72.5806	78.022	T	527	473	89.7533	1	143	120	86.4198	1	T	94	47	72.5806	1	T	140	88	78.022	1	4	0
nad2	794	89.7311	63.8298	29.9363	76.5432	T	409	367	89.7311	1	112	50	63.8298	1	T	273	51	29.9363	1	T	121	68	76.5432	1	4	0
nad4	158	89.6714	87.5	70.5882	88.7218	T	426	382	89.6714	1	125	92	87.5	1	T	147	77	70.5882	1	T	221	151	88.7218	1	4	0
nad4	896	89.2405	88.4615	86.2385	95.3125	T	316	282	89.2405	1	109	76	88.4615	1	T	180	105	86.2385	1	T	188	149	95.3125	1	4	0
nad4	1129	89.0909	93.6	84.7328	84.6667	T	660	588	89.0909	1	178	147	93.6	1	T	188	119	84.7328	1	T	214	148	84.6667	1	4	0
nad4	166	89.0558	89.7727	55.102	89.9225	T	466	415	89.0558	1	129	104	89.7727	1	T	135	56	55.102	1	T	212	147	89.9225	1	4	0
ccmC	76	89.0511	57.8947	55.2632	73.0769	T	137	122	89.0511	1	30	13	57.8947	1	T	54	22	55.2632	1	T	41	23	73.0769	1	4	0
nad5	1610	89.0311	86.3636	87.1622	94.697	T	547	487	89.0311	1	106	83	86.3636	1	T	195	137	87.1622	1	T	185	145	94.697	1	4	0
ccmFn	751	88.961	85.7143	72.7273	90.9091	T	154	137	88.961	1	24	21	85.7143	1	T	57	41	72.7273	1	T	28	24	90.9091	1	4	0
mttB	566	88.8112	63.6364	73.3333	94.4444	T	143	127	88.8112	1	12	7	63.6364	1	T	65	27	73.3333	1	T	25	18	94.4444	1	4	0
nad4	1211	88.6872	89.5238	72	83.3333	T	716	635	88.6872	1	134	118	89.5238	1	T	161	92	72	1	T	137	102	83.3333	1	4	0
ccmFn	38	88.4615	50	53.8462	100	T	104	92	88.4615	1	18	7	50	1	T	33	8	53.8462	1	T	21	15	100	1	4	0
ccmC	115	88.3333	70.8333	78.9474	94.1176	T	180	159	88.3333	1	37	21	70.8333	1	T	54	31	78.9474	1	T	52	41	94.1176	1	4	0
ccmFc	103	88.3333	48.3871	51.7241	77.7778	T	60	53	88.3333	1	50	18	48.3871	1	T	53	16	51.7241	1	T	33	17	77.7778	1	4	0
nad5	1589	88.1603	86.8852	93.7063	90.5109	T	549	484	88.1603	1	79	64	86.8852	1	T	196	146	93.7063	1	T	214	156	90.5109	1	4	0
nad1	653	87.8698	90.2778	80.6897	75.9036	T	338	297	87.8698	1	168	77	90.2778	1	T	215	117	80.6897	1	T	112	66	75.9036	1	4	0
ccmC	103	87.7907	76.1905	55.8824	83.3333	T	172	151	87.7907	1	32	18	76.1905	1	T	50	20	55.8824	1	T	44	32	83.3333	1	4	0
ccmFn	800	87.7049	77.7778	73.4694	80	T	244	214	87.7049	1	25	17	77.7778	1	T	55	36	73.4694	1	T	33	24	80	1	4	0
nad5	608	87.6676	46.2963	56.746	86.7769	T	373	327	87.6676	1	60	27	46.2963	1	T	298	153	56.746	1	T	154	121	86.7769	1	4	0
mttB	536	87.6623	46.1538	64.7059	94.1176	T	154	135	87.6623	1	20	8	46.1538	1	T	47	28	64.7059	1	T	22	16	94.1176	1	4	0
ccmC	575	87.6033	21.4286	60	83.3333	T	121	106	87.6033	1	19	4	21.4286	0.999992	T	40	15	60	1	T	57	25	83.3333	1	4	0
nad4	107	87.2449	92.4051	78.7879	96.1832	T	392	342	87.2449	1	131	101	92.4051	1	T	153	86	78.7879	1	T	224	166	96.1832	1	4	0
nad2	952	87.1148	87.931	47.619	85.9155	T	357	311	87.1148	1	93	81	87.931	1	T	222	97	47.619	1	T	88	69	85.9155	1	4	0
nad1	808	86.9396	64.7059	74.8387	83.0508	T	513	446	86.9396	1	50	18	64.7059	1	T	325	137	74.8387	1	T	197	118	83.0508	1	4	0
ccmFc	878	86.9048	80.7692	92.3077	85	T	84	73	86.9048	1	48	35	80.7692	1	T	58	39	92.3077	1	T	28	21	85	1	4	0
mttB	542	86.8966	45.4545	65.625	88.8889	T	145	126	86.8966	1	17	7	45.4545	1	T	43	25	65.625	1	T	23	16	88.8889	1	4	0
nad1	838	86.8766	66.6667	75.5556	76.9231	T	381	331	86.8766	1	39	15	66.6667	1	T	267	119	75.5556	1	T	166	90	76.9231	1	4	0
nad1	847	86.8035	69.2308	70.0855	80	T	341	296	86.8035	1	37	14	69.2308	1	T	229	100	70.0855	1	T	139	84	80	1	4	0
ccmB	172	86.6667	53.3333	56.5217	75	T	30	26	86.6667	1	17	8	53.3333	1	T	42	15	56.5217	1	T	23	14	75	1	4	0
ccmC	548	86.6667	21.4286	82.3529	83.3333	T	150	130	86.6667	1	19	4	21.4286	0.99999	T	53	32	82.3529	1	T	74	35	83.3333	1	4	0
nad2	367	86.4333	72.8395	56.8421	72.7273	T	457	395	86.4333	1	92	69	72.8395	1	T	123	58	56.8421	1	T	118	73	72.7273	1	4	0
ccmFn	1295	86.4198	76.1905	69.9029	72.5	T	162	140	86.4198	1	32	25	76.1905	1	T	128	81	69.9029	1	T	55	36	72.5	1	4	0
nad4	1151	86.4048	90.4	79.7101	86.8421	T	662	572	86.4048	1	184	151	90.4	1	T	195	117	79.7101	1	T	226	159	86.8421	1	4	0
nad4	74	86.4	76.1194	65.9341	77.6699	T	375	324	86.4	1	144	93	76.1194	1	T	156	63	65.9341	1	T	168	95	77.6699	1	4	0
nad2	1121	85.8491	67.6923	48.5294	80.3922	T	318	273	85.8491	1	83	50	67.6923	1	T	209	70	48.5294	1	T	79	47	80.3922	1	4	0
rps4	872	85.7724	73.6842	34.2857	60.5263	T	246	211	85.7724	1	75	43	73.6842	1	T	94	13	34.2857	1	T	66	29	60.5263	1	4	0
ccmFn	283	85.6031	72.4138	64.7059	80	T	257	220	85.6031	1	32	24	72.4138	1	T	59	33	64.7059	1	T	29	19	80	1	4	0
nad5	548	85.5696	55	36.6379	89.5954	T	395	338	85.5696	1	96	48	55	1	T	285	91	36.6379	1	T	223	184	89.5954	1	4	0
ccmFn	1396	85.5019	72.2222	62.4204	72.549	T	269	230	85.5019	1	21	14	72.2222	1	T	171	100	62.4204	1	T	72	43	72.549	1	4	0
nad4	1148	85.2986	88	75.5396	79.6053	T	653	557	85.2986	1	184	145	88	1	T	196	112	75.5396	1	T	226	148	79.6053	1	4	0
nad4L	100	85.2941	27.7778	61.5385	74.4681	T	238	203	85.2941	1	33	8	27.7778	1	T	60	19	61.5385	1	T	80	41	74.4681	1	4	0
ccmB	160	85.1852	46.6667	52.9412	46.1538	T	27	23	85.1852	1	22	7	46.6667	1	T	36	9	52.9412	1	T	23	6	46.1538	1	4	0
nad4	836	84.7059	71.5686	75	86.3014	T	425	360	84.7059	1	145	89	71.5686	1	T	164	88	75	1	T	208	150	86.3014	1	4	0
nad7	77	84.4156	100	82.2785	92.7536	T	462	390	84.4156	1	94	30	100	1	T	326	75	82.2785	1	T	196	103	92.7536	1	4	0
nad7	83	84.3882	95.8333	79.7468	87.8788	T	474	400	84.3882	1	94	28	95.8333	1	T	319	70	79.7468	1	T	172	85	87.8788	1	4	0
nad2	394	84.1603	76.25	74.5763	78.1609	T	524	441	84.1603	1	148	112	76.25	1	T	89	46	74.5763	1	T	133	86	78.1609	1	4	0
nad1	665	83.9599	88	73.3766	69.0476	T	399	335	83.9599	1	174	76	88	1	T	280	119	73.3766	1	T	121	62	69.0476	1	4	0
nad7	533	83.9442	71.6763	78.6787	77.4545	T	1138	962	83.9442	1	224	148	71.6763	1	T	426	278	78.6787	1	T	360	252	77.4545	1	4	0
nad2	56	83.8863	69.5652	78.5714	68.0851	T	211	177	83.8863	1	68	17	69.5652	1	T	228	35	78.5714	1	T	118	40	68.0851	1	4	0
ccmFc	1315	83.7838	91.6667	73.1343	88.5714	T	37	31	83.7838	1	44	34	91.6667	1	T	85	53	73.1343	1	T	40	32	88.5714	1	4	0
ccmFn	1312	83.5938	73.6842	73.9583	79.4118	T	128	107	83.5938	1	29	21	73.6842	1	T	114	79	73.9583	1	T	45	30	79.4118	1	4	0
ccmFn	1345	83.4197	64.7059	66	71.0526	T	193	161	83.4197	1	24	17	64.7059	1	T	169	101	66	1	T	45	30	71.0526	1	4	0
ccmFc	146	83.3333	67.6471	54.8387	55	T	54	45	83.3333	1	56	37	67.6471	1	T	56	18	54.8387	1	T	31	13	55	1	4	0
sdh4	194	82.7899	51.773	76.4602	89.4928	T	1656	1371	82.7899	1	353	93	51.773	1	T	1119	459	76.4602	1	T	1856	1129	89.4928	1	4	0
nad5	1550	82.5427	86.6667	84.252	82.1138	T	527	435	82.5427	1	52	39	86.6667	1	T	187	113	84.252	1	T	183	119	82.1138	1	4	0
ccmFn	98	82.197	61.5385	72	94.1176	T	264	217	82.197	1	50	26	61.5385	1	T	50	19	72	1	T	32	20	94.1176	1	4	0
nad2	782	82.0707	68.0851	38.6861	85.8824	T	396	325	82.0707	1	108	54	68.0851	1	T	266	55	38.6861	1	T	133	83	85.8824	1	4	0
nad2	956	81.7942	77.193	32.4607	80.5556	T	379	310	81.7942	1	90	70	77.193	1	T	224	68	32.4607	1	T	94	65	80.5556	1	4	0
nad4	29	81.5789	90.7407	51.5152	80.4348	T	190	155	81.5789	1	60	49	90.7407	1	T	76	20	51.5152	1	T	81	44	80.4348	1	4	0
nad2	1410	81.4815	25	63.8298	62.963	T	378	308	81.4815	1	54	8	25	1	T	122	32	63.8298	1	T	96	41	62.963	1	4	0
nad5	1580	81.1518	72.9167	61.6438	88.806	T	573	465	81.1518	1	67	43	72.9167	1	T	203	97	61.6438	1	T	211	150	88.806	1	4	0
rps3	1567	81.1297	75.1241	71.9424	91.6667	T	779	632	81.1297	1	3041	2171	75.1241	1	T	191	120	71.9424	1	T	196	171	91.6667	1	4	0
ccmB	374	80.531	63.3333	42.1053	87.0968	T	113	91	80.531	1	53	31	63.3333	1	T	74	30	42.1053	1	T	45	32	87.0968	1	4	0
ccmFn	1327	80.3797	84.2105	70.0855	78.5714	T	158	127	80.3797	1	31	27	84.2105	1	T	134	87	70.0855	1	T	49	37	78.5714	1	4	0
nad2	26	80	33.3333	70.3704	56.5217	T	120	96	80	1	45	5	33.3333	1	T	128	19	70.3704	1	T	74	16	56.5217	1	4	0
ccmB	422	79.5699	60	51.1628	87.5	T	93	74	79.5699	1	53	32	60	1	T	76	26	51.1628	1	T	44	24	87.5	1	4	0
ccmB	71	79.1667	60	61.5385	73.3333	T	48	38	79.1667	1	37	16	60	1	T	33	8	61.5385	1	T	43	16	73.3333	1	4	0
ccmC	399	78.9216	35.2941	16.4706	24.2424	T	204	161	78.9216	1	43	12	35.2941	1	T	126	15	16.4706	1	T	203	38	24.2424	1	4	0
nad2	311	78.7342	97.1831	83.8983	79.4521	T	395	311	78.7342	1	87	76	97.1831	1	T	161	105	83.8983	1	T	88	63	79.4521	1	4	0
nad4	977	78.2334	79.7468	61.3208	63.7168	T	317	248	78.2334	1	102	79	79.7468	1	T	134	70	61.3208	1	T	151	83	63.7168	1	4	0
ccmFn	372	78.0769	56.7568	24.1935	65.3846	T	260	203	78.0769	1	43	21	56.7568	1	T	67	16	24.1935	1	T	45	27	65.3846	1	4	0
ccmFc	1234	77.5281	98	56.0976	87.5	T	89	69	77.5281	1	87	82	98	1	T	49	25	56.0976	1	T	47	39	87.5	1	4	0
rpl16	383	77.4648	37.2093	80.8219	68.1818	T	142	110	77.4648	1	66	21	37.2093	1	T	111	62	80.8219	1	T	90	45	68.1818	1	4	0
ccmFc	1160	77.2152	83.3333	78.125	91.4286	T	79	61	77.2152	1	90	72	83.3333	1	T	69	51	78.125	1	T	38	34	91.4286	1	4	0
rpl10	155	77.0181	82.5758	72.2513	76.7442	T	1214	935	77.0181	1	170	124	82.5758	1	T	449	154	72.2513	1	T	126	70	76.7442	1	4	0
nad2	922	76.9517	66	39.4737	75.9494	T	269	207	76.9517	1	58	39	66	1	T	231	78	39.4737	1	T	114	78	75.9494	1	4	0
sdh4	353	74.7967	64.2857	81.8182	85.0746	T	123	92	74.7967	1	25	9	64.2857	1	T	196	135	81.8182	1	T	95	67	85.0746	1	4	0
mttB	364	73.8636	70	36.3636	80	T	88	65	73.8636	1	13	7	70	1	T	15	5	36.3636	1	T	13	8	80	1	4	0
ccmFc	119	73.2143	67.6471	40.7407	62.5	T	56	41	73.2143	1	43	27	67.6471	1	T	48	12	40.7407	1	T	34	12	62.5	1	4	0
rpl16	214	72.1477	90.6746	53.3981	82.4818	T	298	215	72.1477	1	631	521	90.6746	1	T	140	57	53.3981	1	T	180	131	82.4818	1	4	0
ccmB	286	71.2329	33.3333	40.4762	80	T	73	52	71.2329	1	20	5	33.3333	1	T	52	17	40.4762	1	T	25	14	80	1	4	0
nad7	1050	71.1844	34.5238	69.0476	82.7338	T	819	583	71.1844	1	137	39	34.5238	1	T	290	90	69.0476	1	T	198	129	82.7338	1	4	0
ccmB	80	70.8333	40	35.7143	53.3333	T	48	34	70.8333	1	37	12	40	1	T	36	5	35.7143	1	T	46	13	53.3333	1	4	0
mttB	604	70.5882	50	75	56.25	T	153	108	70.5882	1	13	6	50	1	T	71	32	75	1	T	26	12	56.25	1	4	0
nad5	155	70.3812	65.2174	72.7891	78.5714	T	341	240	70.3812	1	115	23	65.2174	1	T	694	122	72.7891	1	T	209	100	78.5714	1	4	0
nad7	38	70.2941	72.7273	68.8889	84.4828	T	340	239	70.2941	1	68	11	72.7273	1	T	185	34	68.8889	1	T	144	64	84.4828	1	4	0
ccmFc	122	69.6429	67.6471	48.1481	81.25	T	56	39	69.6429	1	42	27	67.6471	1	T	48	14	48.1481	1	T	34	16	81.25	1	4	0
nad9	92	68.6813	31.5789	27.4809	49.0385	T	182	125	68.6813	1	88	21	31.5789	1	T	318	38	27.4809	1	T	147	60	49.0385	1	4	0
nad9	298	67.4419	18.4502	44.0476	63.3929	T	387	261	67.4419	1	386	71	18.4502	1	T	496	192	44.0476	1	T	148	73	63.3929	1	4	0
rpl16	110	66.7665	89.2523	48.1481	83.5443	T	334	223	66.7665	1	532	398	89.2523	1	T	108	30	48.1481	1	T	111	68	83.5443	1	4	0
nad9	439	65.1917	12.1581	32.7485	53.0769	T	339	221	65.1917	1	583	47	12.1581	1	T	525	120	32.7485	1	T	190	81	53.0769	1	4	0
rpl16	108	64.3068	76.8692	40.7407	53.2468	T	339	218	64.3068	1	537	341	76.8692	1	T	118	24	40.7407	1	T	111	43	53.2468	1	4	0
nad9	328	64.3068	14.8649	39.4737	42.735	T	339	218	64.3068	1	467	63	14.8649	1	T	471	159	39.4737	1	T	163	55	42.735	1	4	0
ccmB	338	63.2184	13.7931	29.0909	90.3226	T	87	55	63.2184	1	33	4	13.7931	1	T	74	19	29.0909	1	T	44	33	90.3226	1	4	0
mttB	367	60.7595	40	30	70	T	79	48	60.7595	1	12	4	40	1	T	14	4	30	0.999999	T	13	7	70	1	4	0
ccmB	154	54.8387	53.3333	47.0588	53.8462	T	31	17	54.8387	1	24	10	53.3333	1	T	37	8	47.0588	1	T	23	7	53.8462	1	4	0
atp4	382	54.6763	51.9824	41.2587	31.5789	T	278	152	54.6763	1	372	192	51.9824	1	T	214	63	41.2587	1	T	181	45	31.5789	1	4	0
ccmB	313	52.9412	17.6471	18.5185	64	T	85	45	52.9412	1	21	3	17.6471	0.999841	T	70	12	18.5185	1	T	35	18	64	1	4	0
ccmB	128	52.6316	20	35.2941	36.3636	T	38	20	52.6316	1	26	5	20	0.99999	T	41	8	35.2941	1	T	28	6	36.3636	1	4	0
ccmB	164	51.7241	33.3333	34.7826	46.6667	T	29	15	51.7241	1	22	5	33.3333	1	T	45	8	34.7826	1	T	22	7	46.6667	1	4	0
nad2	1402	50.1235	26.9231	30.6122	38.5965	T	405	203	50.1235	1	59	9	26.9231	1	T	132	17	30.6122	1	T	105	26	38.5965	1	4	0
rpl16	389	48.3607	23.8095	48.4848	65.4545	T	122	59	48.3607	1	64	10	23.8095	1	T	100	32	48.4848	1	T	77	36	65.4545	1	4	0
ccmB	137	46.1538	53.3333	33.3333	63.6364	T	26	12	46.1538	1	24	10	53.3333	1	T	39	6	33.3333	1	T	25	10	63.6364	1	4	0
ccmFc	744	45.7143	33.3333	18.4211	38.8889	T	70	32	45.7143	1	26	8	33.3333	1	T	51	7	18.4211	1	T	21	7	38.8889	1	4	0
ccmC	605	44.2748	28.5714	28	60	T	131	58	44.2748	1	20	5	28.5714	1	T	40	8	28	1	T	45	17	60	1	4	0
ccmFc	310	43.6123	51.8519	46.6667	18.0556	T	227	99	43.6123	1	298	31	51.8519	1	T	151	30	46.6667	1	T	186	16	18.0556	1	4	0
nad4	1101	42.4074	61.0619	46.9231	59.5238	T	540	229	42.4074	1	167	81	61.0619	1	T	197	67	46.9231	1	T	180	84	59.5238	1	4	0
atp1	1425	33.998	26.7969	12.6246	10.9005	T	1003	341	33.998	1	3315	778	26.7969	1	T	381	41	12.6246	1	T	923	90	10.9005	1	4	0
ccmFn	279	30.8594	20.6897	10.2041	55.5556	T	256	79	30.8594	1	32	7	20.6897	1	T	58	5	10.2041	1	T	27	10	55.5556	1	4	0
nad2	609	28.0576	47.8261	17.0455	17.284	T	417	117	28.0576	1	137	11	47.8261	1	T	815	15	17.0455	1	T	210	14	17.284	1	4	0
sdh4	203	27.8024	16.4286	16.8174	11.24	T	1356	377	27.8024	1	239	28	16.4286	1	T	1134	98	16.8174	1	T	1909	150	11.24	1	4	0
nad7	531	27.3276	12.9944	16.9139	28	T	1160	317	27.3276	1	230	27	12.9944	1	T	427	60	16.9139	1	T	357	88	28	1	4	0
atp8	393	25	17.2414	30.8271	18.4524	T	232	58	25	1	77	6	17.2414	1	T	234	44	30.8271	1	T	249	34	18.4524	1	4	0
nad4L	197	20.0565	22.5806	24	21.3115	T	354	71	20.0565	1	136	11	22.5806	1	T	272	19	24	1	T	180	15	21.3115	1	4	0
nad7	963	11.1575	11.8421	20.1058	19.2708	T	959	107	11.1575	1	108	12	11.8421	1	T	305	38	20.1058	1	T	288	40	19.2708	1	4	0
rps3	64	100	100	100		T	115	115	100	1	22	14	100	1	T	29	13	100	1	C	36				3	1
ccmC	331	96.5	29.5082	11.1588		T	200	193	96.5	1	111	23	29.5082	1	T	528	28	11.1588	1	C	850				3	1
ccmC	281	93.7198	34.9206	13.9706		T	207	194	93.7198	1	141	32	34.9206	1	T	906	45	13.9706	1	C	1126				3	1
mttB	493	92.7928	57.1429	77.2727		T	111	103	92.7928	1	18	8	57.1429	1	T	29	19	77.2727	1	C	15				3	1
ccmB	545	78	41.6667	69.2308		T	50	39	78	1	26	9	41.6667	1	T	44	19	69.2308	1	C	19				3	1
ccmFc	50	73.4694	42.8571	48.2759		T	49	36	73.4694	1	30	6	42.8571	1	T	42	15	48.2759	1	C	21				3	1
ccmFc	52	73.4694	28.5714	48.2759		T	49	36	73.4694	1	31	4	28.5714	1	T	42	15	48.2759	1	C	21				3	1
ccmB	548	67.3469	25	26.9231		T	49	33	67.3469	1	26	5	25	0.999995	T	44	8	26.9231	1	C	19				3	1
ccmB	566	64.2857	36.3636	75		T	42	27	64.2857	1	25	7	36.3636	1	T	36	16	75	1	C	18				3	1
ccmFc	38	31.8182	36.3636	24		T	44	14	31.8182	1	25	4	36.3636	1	T	35	7	24	1	C	18				3	1
rps1	45	24.3421	25.0936	14.8148		T	152	37	24.3421	1	901	81	25.0936	1	T	137	12	14.8148	1	C	75				3	1
ccmFn	756	12.1212	31.8182	10.9091		T	165	20	12.1212	1	25	9	31.8182	1	T	58	6	10.9091	1	C	30				3	1
ccmFc	334	10.2222	18.5185	36.6667		T	225	23	10.2222	1	305	11	18.5185	1	T	151	23	36.6667	1	C	178				3	1
ccmC	179	95.6522	47.1698		15.8416	T	230	220	95.6522	1	107	33	47.1698	1	C	590				T	475	42	15.8416	1	3	1
ccmC	395	92.0398	52.9412		28.5714	T	201	185	92.0398	1	43	19	52.9412	1	C	153				T	208	46	28.5714	1	3	1
atp1	1041	11.3189	19.3548		14.7059	T	1016	115	11.3189	1	355	61	19.3548	1	C	364				T	481	65	14.7059	1	3	1
ccmC	184	94.0426	41.5094			T	235	221	94.0426	1	106	29	41.5094	1	C	683				C	535				2	2
ccmB	43	74.359	36.3636			T	39	29	74.359	1	21	4	36.3636	1	C	25				C	30				2	2
ccmFn	303	38.6973	13.0435			T	261	101	38.6973	1	26	3	13.0435	0.999971	C	67				C	35				2	2
atp8	366	13.9535	23.5294			T	301	42	13.9535	1	57	11	23.5294	1	C	241				C	269				2	2
atp6	658	100		90.4762	83.3333	T	220	220	100	1	22				T	72	20	90.4762	1	T	146	50	83.3333	1	3	1
atp6	650	99.6078		81.4815	84	T	255	254	99.6078	1	24				T	81	23	81.4815	1	T	154	55	84	1	3	1
atp6	674	99.435		60	83.7838	T	177	176	99.435	1	18				T	55	9	60	1	T	114	38	83.7838	1	3	1
atp6	665	99.0566		80	84.7826	T	212	210	99.0566	1	22				T	69	16	80	1	T	143	50	84.7826	1	3	1
ccmC	656	97.7011		66.6667	91.4286	T	87	85	97.7011	1	11				T	75	30	66.6667	1	T	71	39	91.4286	1	3	1
ccmC	650	97.7011		56.4103	88.5714	T	87	85	97.7011	1	11				T	75	26	56.4103	1	T	70	38	88.5714	1	3	1
nad6	53	96.4706		89.4737	75.7576	T	170	164	96.4706	1	26				T	63	22	89.4737	1	T	90	55	75.7576	1	3	1
nad6	26	96.4539		84.6154	80.9524	T	141	136	96.4539	1	26				T	45	13	84.6154	1	T	58	38	80.9524	1	3	1
ccmC	673	92.5		56.4103	83.3333	T	80	74	92.5	1	10				T	71	24	56.4103	1	T	73	38	83.3333	1	3	1
ccmC	421	91.6168		55.5556	82.3529	T	167	153	91.6168	1	23				T	36	16	55.5556	1	T	46	31	82.3529	1	3	1
nad6	103	91.0204		85.1852	76.9231	T	245	223	91.0204	1	26				T	79	27	85.1852	1	T	102	64	76.9231	1	3	1
ccmC	568	90.9774		79.3103	93.75	T	133	121	90.9774	1	21				T	45	24	79.3103	1	T	58	32	93.75	1	3	1
mttB	598	90.1961		67.6471	83.3333	T	153	138	90.1961	1	12				T	69	28	67.6471	1	T	29	18	83.3333	1	3	1
ccmC	436	89.9441		44	73.0769	T	179	161	89.9441	1	19				T	32	11	44	1	T	36	21	73.0769	1	3	1
mttB	655	89.5522		77.7778	88.8889	T	134	120	89.5522	1	22				T	49	28	77.7778	1	T	27	19	88.8889	1	3	1
ccmC	446	88.3041		53.5714	77.7778	T	171	151	88.3041	1	18				T	32	16	53.5714	1	T	44	25	77.7778	1	3	1
ccmC	497	87.8049		92.8571	82.7586	T	164	144	87.8049	1	26				T	50	41	92.8571	1	T	56	29	82.7586	1	3	1
ccmFn	1475	86.9565		61.9565	71.7391	T	276	240	86.9565	1	12				T	109	61	61.9565	1	T	57	37	71.7391	1	3	1
nad6	146	86.6667		86.1111	77.3333	T	240	208	86.6667	1	12				T	71	33	86.1111	1	T	88	62	77.3333	1	3	1
nad6	161	86.5546		77.5	73.2394	T	238	206	86.5546	1	12				T	71	33	77.5	1	T	84	58	73.2394	1	3	1
ccmC	458	86.3636		54.5455	73.0769	T	154	133	86.3636	1	16				T	38	20	54.5455	1	T	39	23	73.0769	1	3	1
ccmC	45	85.5556		40	80	T	90	77	85.5556	1	17				T	32	9	40	1	T	26	13	80	1	3	1
nad4L	21	83.5443		45.4545	87.5	T	79	66	83.5443	1	12				T	41	10	45.4545	1	T	32	15	87.5	1	3	1
ccmC	614	79.2793		28	95.4545	T	111	88	79.2793	1	18				T	47	8	28	1	T	44	26	95.4545	1	3	1
ccmB	179	79.1667		43.4783	62.5	T	24	19	79.1667	1	11				T	41	11	43.4783	1	T	20	11	62.5	1	3	1
mttB	395	78.4091		46.1538	76.9231	T	88	69	78.4091	1	13				T	17	7	46.1538	1	T	14	10	76.9231	1	3	1
nad6	89	74.1379		77.7778	67.0732	T	232	172	74.1379	1	30				T	83	24	77.7778	1	T	108	57	67.0732	1	3	1
ccmC	467	72.5352		60	65.2174	T	142	103	72.5352	1	16				T	40	22	60	1	T	35	17	65.2174	1	3	1
mttB	701	72.2222		68.1818	53.3333	T	126	91	72.2222	1	21				T	49	19	68.1818	1	T	20	9	53.3333	1	3	1
mttB	660	65.3846		72	50	T	130	85	65.3846	1	22				T	44	24	72	1	T	24	9	50	1	3	1
ccmB	418	58.7629		22.7273	69.5652	T	97	57	58.7629	1	53				T	77	13	22.7273	1	T	43	18	69.5652	1	3	1
ccmB	461	51.087		26.4706	50	T	92	47	51.087	1	45				T	65	9	26.4706	1	T	18	8	50	1	3	1
ccmC	619	38.3178		58.3333	57.6923	T	107	41	38.3178	1	15				T	49	15	58.3333	1	T	58	19	57.6923	1	3	1
ccmFn	604	23.2919		10.3448	21.7391	T	322	75	23.2919	1	14				T	67	6	10.3448	1	T	33	5	21.7391	1	3	1
nad3	79	20.678		25.641	18.4615	T	295	61	20.678	1	116				T	166	25	25.641	1	T	125	16	18.4615	1	3	1
ccmB	90	20.4082		25	18.75	T	49	10	20.4082	1	37				T	43	4	25	1	T	43	3	18.75	0.999993	3	1
ccmB	479	20.2247		14.2857	36.3636	T	89	18	20.2247	1	46				T	62	5	14.2857	1	T	12	4	36.3636	1	3	1
mttB	88	75.3731		60		T	134	101	75.3731	1	34				T	23	8	60	1	C	21				2	2
mttB	116	72.8916		72.7273		T	166	121	72.8916	1	20				T	30	11	72.7273	1	C	12				2	2
ccmB	590	62.963		20		T	27	17	62.963	1	17				T	29	4	20	0.999996	C	17				2	2
mttB	119	61.5854		61.5385		T	164	101	61.5854	1	20				T	32	10	61.5385	1	C	11				2	2
ccmB	508	31.1475		20.6897		T	61	19	31.1475	1	36				T	52	7	20.6897	1	C	12				2	2
ccmB	506	23.3333		30		T	60	14	23.3333	1	35				T	54	10	30	1	C	11				2	2
mttB	52	65.9574			54.5455	T	94	62	65.9574	1	27				C	17				T	25	6	54.5455	1	2	2
ccmFc	321	63.6771			69.4444	T	223	142	63.6771	1	298				C	153				T	182	57	69.4444	1	2	2
rps4	762	14.0244			22.5806	T	164	23	14.0244	1	92				C	71				T	46	7	22.5806	1	2	2
ccmC	624	12.766			16	T	94	12	12.766	1	11				C	68				T	55	4	16	1	2	2
ccmC	5	84.8485				T	66	56	84.8485	1	10				C	17				C	11				1	3
mttB	316	59.5238				T	84	50	59.5238	1	11				C	13				C	10				1	3
ccmB	28	50				T	34	17	50	1	17				C	18				C	21				1	3
mttB	14	48.9796				T	49	24	48.9796	1	16				C	11				C	19				1	3
ccmB	563	34.8837				T	43	15	34.8837	1	26				C	40				C	18				1	3
nad5	1695	23.1481				T	432	100	23.1481	1	206				C	232				C	201				1	3
nad2	303	21.1055				T	398	84	21.1055	1	83				C	149				C	80				1	3
ccmFn	400	18.5714				T	280	52	18.5714	1	56				C	74				C	46				1	3
ccmFn	453	15.9468				T	301	48	15.9468	1	32				C	93				C	42				1	3
matR	32	15.2866				T	157	24	15.2866	1	452				C	107				C	74				1	3
ccmFn	118	13.9683				T	315	44	13.9683	1	47				C	58				C	40				1	3
ccmFc	342	13.1818				T	220	29	13.1818	1	306				C	139				C	173				1	3
ccmB	324	13.0952				T	84	11	13.0952	1	26				C	74				C	40				1	3
rps4	948	12.6984				T	126	16	12.6984	1	39				C	58				C	22				1	3
ccmFc	793	12.0482				T	83	10	12.0482	1	31				C	43				C	25				1	3
nad2	252	11.8557				T	388	46	11.8557	1	67				C	125				C	114				1	3
ccmFn	29	11.828				T	93	11	11.828	1	16				C	27				C	16				1	3
atp1	1483	11.0714				T	560	62	11.0714	1	326				C	213				C	500				1	3
rps4	210	10.9756				T	328	36	10.9756	1	62				C	171				C	188				1	3
rps3	172	10.0671				T	149	15	10.0671	1	100				C	151				C	93				1	3
nad2	262		37.5	36.5079	28.7671	C	346				49	9	37.5	1	T	109	23	36.5079	1	T	108	24	28.7671	1	3	1
rps3	213		12.5	13.6986	12.5	C	127				143	17	12.5	1	T	163	10	13.6986	1	T	139	12	12.5	1	3	1
ccmFc	333		12.963		11.2676	C	225				303	11	12.963	1	C	151				T	179	9	11.2676	1	2	2
nad5	1740		14.8649			C	524				222	32	14.8649	1	C	280				C	221				1	3
rps3	550		12.6984			C	197				107	10	12.6984	1	C	151				C	141				1	3
ccmFn	999		11.5385			C	262				30	3	11.5385	0.999878	C	82				C	41				1	3
ccmFn	261		11.1111			C	233				31	3	11.1111	0.999967	C	56				C	21				1	3
cob	993		11.1111			C	345				113	11	11.1111	1	C	325				C	134				1	3
ccmC	276			61.5672	50.7905	C	208				137				T	926	190	61.5672	1	T	1108	391	50.7905	1	2	2
rps3	1307			11.8812	15.873	C	697				398				T	504	29	11.8812	1	T	235	29	15.873	1	2	2
cob	1098			25.6		C	461				247				T	217	37	25.6	1	C	167				1	3
nad4	436			17.7778		C	302				46				T	77	8	17.7778	1	C	95				1	3
ccmB	139			16.6667		C	29				24				T	39	4	16.6667	0.999995	C	25				1	3
rps4	8			15		C	95				30				T	31	3	15	0.9999	C	20				1	3
nad2	1379			11.7647		C	556				73				T	149	6	11.7647	1	C	128				1	3
ccmB	87				26.6667	C	49				37				C	44				T	45	6	26.6667	1	1	3
nad7	45				22.0339	C	368				72				C	212				T	147	18	22.0339	1	1	3
nad4L	252				11.7647	C	268				145				C	173				T	96	6	11.7647	1	1	3

## Sheet: Table S3e (sites_all_species)
CDS	CDS position	P_trichocarpa (frequency)	P_alba (frequency)	P_davidiana (frequency)	P_tremula (frequency)		P_trichocarpa (coverage)	P_trichocarpa (count)	P_trichocarpa (frequency)	P_trichocarpa (probability)	P_alba (coverage)	P_alba (count)	P_alba (frequency)	P_alba (probability)	P_davidiana (alt)	P_davidiana (coverage)	P_davidiana (count)	P_davidiana (frequency)	P_davidiana (probability)	P_tremula (alt)	P_tremula (coverage)	P_tremula (count)	P_tremula (frequency)	P_tremula (probability)	Number Of Individual Allels Deviating From Reference	Number Of Allels Matching The Reference With Minimal Coverage
nad7	200	100	100	95.4023	98.913	T	507	507	100	1	57	43	100	1	T	131	88	95.4023	1	T	160	123	98.913	1	4	0
atp6	37	100	94.1176	84.507	96	T	168	168	100	1	44	18	94.1176	1	T	173	62	84.507	1	T	103	57	96	1	4	0
atp6	256	100	82.7586	88	95.6522	T	524	524	100	1	71	57	82.7586	1	T	178	143	88	1	T	133	111	95.6522	1	4	0
nad7	209	99.8016	100	100	100	T	504	503	99.8016	1	57	43	100	1	T	136	98	100	1	T	160	126	100	1	4	0
nad1	400	99.7396	100	96.9231	96.7742	T	384	383	99.7396	1	66	31	100	1	T	137	65	96.9231	1	T	161	112	96.7742	1	4	0
nad4	1438	99.4674	97.7032	83.3333	86.7052	T	751	747	99.4674	1	859	727	97.7032	1	T	149	72	83.3333	1	T	317	204	86.7052	1	4	0
atp6	248	99.4329	91.0714	90.3846	97.3684	T	529	526	99.4329	1	70	62	91.0714	1	T	187	152	90.3846	1	T	155	139	97.3684	1	4	0
nad4	1405	99.3069	98.941	98.4848	97.5758	T	1010	1003	99.3069	1	1179	1016	98.941	1	T	115	71	98.4848	1	T	261	201	97.5758	1	4	0
rps12	196	99.1892	82.9545	89.2216	95.5752	T	370	367	99.1892	1	218	168	82.9545	1	T	247	157	89.2216	1	T	164	127	95.5752	1	4	0
cob	1084	98.7603	96.6942	92.0354	97.7011	T	484	478	98.7603	1	270	195	96.6942	1	T	234	119	92.0354	1	T	146	101	97.7011	1	4	0
ccmFn	137	98.7421	32.1429	76	86.3636	T	318	314	98.7421	1	40	12	32.1429	1	T	52	21	76	1	T	41	31	86.3636	1	4	0
atp6	223	98.7179	91.3043	92.5466	97.4138	T	546	539	98.7179	1	53	48	91.3043	1	T	208	159	92.5466	1	T	163	139	97.4138	1	4	0
nad7	724	98.6974	93.3333	97.048	94.0594	T	998	985	98.6974	1	25	20	93.3333	1	T	358	283	97.048	1	T	283	227	94.0594	1	4	0
atp6	173	98.6813	80	95.3216	95.4128	T	456	449	98.6813	1	50	38	80	1	T	274	181	95.3216	1	T	181	133	95.4128	1	4	0
nad7	836	98.3982	81.4815	78.1726	91.875	T	874	860	98.3982	1	40	29	81.4815	1	T	304	162	78.1726	1	T	223	162	91.875	1	4	0
nad5	1958	98.3806	100	94.7368	93.9394	T	247	243	98.3806	1	55	22	100	1	T	98	57	94.7368	1	T	118	69	93.9394	1	4	0
nad5	1490	98.2673	93.2203	98.5816	99.1379	T	404	397	98.2673	1	88	59	93.2203	1	T	201	144	98.5816	1	T	199	138	99.1379	1	4	0
nad2	1451	98.2143	54.5455	62.5	86.6667	T	168	165	98.2143	1	19	7	54.5455	1	T	49	15	62.5	1	T	51	33	86.6667	1	4	0
cob	982	98.1818	95.3488	85.4651	95.5556	T	275	270	98.1818	1	97	92	95.3488	1	T	302	161	85.4651	1	T	129	109	95.5556	1	4	0
rps12	269	97.8916	72.8261	74.1497	94.7368	T	332	325	97.8916	1	190	100	72.8261	1	T	256	116	74.1497	1	T	158	115	94.7368	1	4	0
nad1	584	97.7273	98.4375	100	90.7692	T	88	86	97.7273	1	151	101	98.4375	1	T	93	77	100	1	T	119	70	90.7692	1	4	0
nad2	1292	97.5556	78.2609	92.5373	94.4444	T	450	439	97.5556	1	39	23	78.2609	1	T	130	62	92.5373	1	T	95	64	94.4444	1	4	0
nad6	463	97.3545	85.1351	86.1111	82.8947	T	189	184	97.3545	1	101	83	85.1351	1	T	83	64	86.1111	1	T	87	65	82.8947	1	4	0
nad5	1895	97.3039	87.5	94.5578	98.1595	T	408	397	97.3039	1	77	42	87.5	1	T	242	157	94.5578	1	T	288	224	98.1595	1	4	0
nad4	857	97.2637	92.1569	82.7586	93.7931	T	402	391	97.2637	1	145	114	92.1569	1	T	172	104	82.7586	1	T	207	166	93.7931	1	4	0
nad4	1417	97.2136	95.764	88.8889	92.3497	T	969	942	97.2136	1	1081	898	95.764	1	T	155	80	88.8889	1	T	317	221	92.3497	1	4	0
ccmFc	406	97.1963	65	62.2449	80.5556	T	107	104	97.1963	1	67	43	65	1	T	120	65	62.2449	1	T	55	39	80.5556	1	4	0
nad7	1124	96.7341	56.6038	84.6154	89.0625	T	643	622	96.7341	1	108	42	56.6038	1	T	219	122	84.6154	1	T	262	147	89.0625	1	4	0
nad4	608	96.6926	88.7097	72.3684	85.5422	T	514	497	96.6926	1	88	57	88.7097	1	T	130	63	72.3684	1	T	134	81	85.5422	1	4	0
nad4	767	96.6862	85.8268	83.1933	90.1099	T	513	496	96.6862	1	172	145	85.8268	1	T	149	105	83.1933	1	T	109	87	90.1099	1	4	0
nad4	1033	96.6587	98.1481	92.4658	90.7563	T	419	405	96.6587	1	133	113	98.1481	1	T	207	144	92.4658	1	T	166	122	90.7563	1	4	0
nad2	428	96.6527	84.3373	66.6667	87.037	T	478	462	96.6527	1	104	80	84.3373	1	T	99	50	66.6667	1	T	157	116	87.037	1	4	0
ccmFn	256	96.5517	76.9231	56.8182	87.5	T	232	224	96.5517	1	27	20	76.9231	1	T	54	28	56.8182	1	T	21	18	87.5	1	4	0
nad5	676	96.5333	73.5849	75.5319	96.6102	T	375	362	96.5333	1	62	43	73.5849	1	T	323	218	75.5319	1	T	155	136	96.6102	1	4	0
ccmC	521	96.4706	42.8571	92.3077	88.5714	T	170	164	96.4706	1	23	9	42.8571	1	T	56	40	92.3077	1	T	73	37	88.5714	1	4	0
nad1	403	96.4377	100	88.5714	91.7526	T	393	379	96.4377	1	75	37	100	1	T	149	64	88.5714	1	T	166	109	91.7526	1	4	0
nad4	376	96.3907	95.6522	69.1176	91.6667	T	471	454	96.3907	1	57	25	95.6522	1	T	138	51	69.1176	1	T	121	82	91.6667	1	4	0
nad5	398	96.2733	57.8947	73.3607	91.3907	T	322	310	96.2733	1	53	29	57.8947	1	T	358	196	73.3607	1	T	223	163	91.3907	1	4	0
nad5	539	96.2704	70.4918	54.0084	90.8571	T	429	413	96.2704	1	102	68	70.4918	1	T	286	136	54.0084	1	T	244	190	90.8571	1	4	0
nad7	335	96.1715	65.7895	71.4286	81.407	T	653	628	96.1715	1	124	73	65.7895	1	T	308	139	71.4286	1	T	298	195	81.407	1	4	0
nad4	44	95.9821	90.9091	50	94.7368	T	224	215	95.9821	1	66	50	90.9091	1	T	94	24	50	1	T	99	66	94.7368	1	4	0
nad4	1172	95.9641	91.2281	76.6234	87.8788	T	669	642	95.9641	1	157	135	91.2281	1	T	201	121	76.6234	1	T	182	138	87.8788	1	4	0
ccmFn	785	95.9091	80.9524	76.9231	91.6667	T	220	211	95.9091	1	24	20	80.9524	1	T	55	40	76.9231	1	T	33	25	91.6667	1	4	0
atp6	479	95.7237	89.7727	85.7143	98.3871	T	304	291	95.7237	1	105	91	89.7727	1	T	179	118	85.7143	1	T	101	77	98.3871	1	4	0
nad2	1270	95.7143	94.4444	86.25	95.6522	T	350	335	95.7143	1	46	21	94.4444	1	T	144	71	86.25	1	T	79	50	95.6522	1	4	0
nad4	433	95.6811	100	66.6667	96.6667	T	301	288	95.6811	1	48	25	100	1	T	87	32	66.6667	1	T	100	72	96.6667	1	4	0
ccmFn	1510	95.5631	88	76.8421	89.7436	T	293	280	95.5631	1	32	26	88	1	T	111	78	76.8421	1	T	53	42	89.7436	1	4	0
nad7	769	95.5193	73.6842	91.2281	88.535	T	982	938	95.5193	1	26	17	73.6842	1	T	313	220	91.2281	1	T	221	153	88.535	1	4	0
nad1	712	95.5095	86.8421	90.2439	84.7826	T	579	553	95.5095	1	155	47	86.8421	1	T	500	218	90.2439	1	T	258	155	84.7826	1	4	0
nad4	77	95.443	79.4521	68.1818	82.243	T	395	377	95.443	1	150	102	79.4521	1	T	152	64	68.1818	1	T	178	103	82.243	1	4	0
nad7	224	95.3287	92.1053	90.991	97.2222	T	578	551	95.3287	1	50	42	92.1053	1	T	178	105	90.991	1	T	178	132	97.2222	1	4	0
nad5	1918	95.3247	100	93.4783	95.935	T	385	367	95.3247	1	81	46	100	1	T	216	141	93.4783	1	T	215	159	95.935	1	4	0
nad1	175	95.1993	95.8525	86.3158	92.2222	T	1104	1051	95.1993	1	776	494	95.8525	1	T	217	89	86.3158	1	T	135	91	92.2222	1	4	0
nad2	523	95.0769	88.2353	76.1194	93.2203	T	325	309	95.0769	1	32	22	88.2353	1	T	108	57	76.1194	1	T	77	64	93.2203	1	4	0
cob	908	95.0413	94.2857	95.1456	93.5484	T	242	230	95.0413	1	49	42	94.2857	1	T	118	102	95.1456	1	T	120	103	93.5484	1	4	0
nad5	764	95.0413	75.5319	61.2648	83.1683	T	363	345	95.0413	1	122	89	75.5319	1	T	291	164	61.2648	1	T	127	91	83.1683	1	4	0
nad5	725	95	80.8989	63.5628	91	T	400	380	95	1	128	96	80.8989	1	T	287	162	63.5628	1	T	118	99	91	1	4	0
nad5	358	94.8949	81.8182	80.1205	92.9134	T	333	316	94.8949	1	44	30	81.8182	1	T	288	139	80.1205	1	T	191	144	92.9134	1	4	0
rps3	1598	94.849	97.9811	87.1212	93.8053	T	563	534	94.849	1	1841	1638	97.9811	1	T	164	125	87.1212	1	T	154	137	93.8053	1	4	0
nad4	403	94.8454	100	80.8511	96.8254	T	388	368	94.8454	1	47	20	100	1	T	114	42	80.8511	1	T	101	73	96.8254	1	4	0
atp6	593	94.8424	80	81.8182	93.9024	T	349	331	94.8424	1	38	21	80	1	T	157	77	81.8182	1	T	163	94	93.9024	1	4	0
nad4	1433	94.8052	95.9283	72.5	89.6175	T	847	803	94.8052	1	938	780	95.9283	1	T	152	64	72.5	1	T	328	219	89.6175	1	4	0
ccmFn	263	94.7598	78.5714	59.5745	77.7778	T	229	217	94.7598	1	31	25	78.5714	1	T	58	31	59.5745	1	T	83	18	77.7778	1	4	0
nad2	1052	94.7598	78.1609	56.8862	84.507	T	458	434	94.7598	1	130	100	78.1609	1	T	205	98	56.8862	1	T	96	65	84.507	1	4	0
nad2	361	94.7368	97.5904	63.2653	83.7209	T	475	450	94.7368	1	94	91	97.5904	1	T	126	68	63.2653	1	T	114	83	83.7209	1	4	0
nad4	164	94.7005	85.2273	58.4158	85.1562	T	434	411	94.7005	1	121	89	85.2273	1	T	138	61	58.4158	1	T	214	139	85.1562	1	4	0
nad6	169	94.5736	81.8182	88.8889	81.5789	T	258	244	94.5736	1	16	11	81.8182	1	T	76	42	88.8889	1	T	89	70	81.5789	1	4	0
nad6	191	94.5525	75	96	86.25	T	257	243	94.5525	1	22	16	75	1	T	68	49	96	1	T	95	80	86.25	1	4	0
nad5	713	94.4444	68.6047	58.6614	89.7196	T	396	374	94.4444	1	113	73	68.6047	1	T	287	150	58.6614	1	T	128	107	89.7196	1	4	0
ccmFn	248	94.3231	84.6154	76.7442	93.3333	T	229	216	94.3231	1	27	22	84.6154	1	T	53	36	76.7442	1	T	20	18	93.3333	1	4	0
nad7	316	94.281	85.0746	72.4138	85.9551	T	612	577	94.281	1	80	62	85.0746	1	T	315	140	72.4138	1	T	287	196	85.9551	1	4	0
nad4	659	94.1053	91.4634	90.991	92.1569	T	475	447	94.1053	1	92	80	91.4634	1	T	132	108	90.991	1	T	142	111	92.1569	1	4	0
ccmC	161	94	87.5	75	94.7368	T	200	188	94	1	40	34	87.5	1	T	49	25	75	1	T	60	46	94.7368	1	4	0
nad4	362	93.9834	100	72.3077	95.6522	T	482	453	93.9834	1	56	27	100	1	T	131	54	72.3077	1	T	120	84	95.6522	1	4	0
nad4	197	93.9759	86.3636	63.8095	86.8421	T	415	390	93.9759	1	63	53	86.3636	1	T	136	71	63.8095	1	T	180	120	86.8421	1	4	0
nad7	251	93.8671	77.0833	74.6154	90.6667	T	587	551	93.8671	1	54	39	77.0833	1	T	215	102	74.6154	1	T	250	169	90.6667	1	4	0
nad5	1916	93.8462	83.3333	94.8529	96.6216	T	390	366	93.8462	1	81	36	83.3333	1	T	215	142	94.8529	1	T	263	193	96.6216	1	4	0
nad2	497	93.7669	89.7436	69.0476	90.1408	T	369	346	93.7669	1	58	39	89.7436	1	T	127	62	69.0476	1	T	99	76	90.1408	1	4	0
nad7	1103	93.5743	67.6923	72.807	90.7143	T	747	699	93.5743	1	127	58	67.6923	1	T	208	89	72.807	1	T	251	147	90.7143	1	4	0
nad5	374	93.3131	66.6667	57.3604	89.1304	T	329	307	93.3131	1	45	26	66.6667	1	T	328	120	57.3604	1	T	212	151	89.1304	1	4	0
nad1	545	93.2432	98.5075	89.6552	90.4255	T	148	138	93.2432	1	144	73	98.5075	1	T	132	83	89.6552	1	T	143	94	90.4255	1	4	0
nad2	308	93.2331	95.7746	66.6667	81.9444	T	399	372	93.2331	1	85	74	95.7746	1	T	155	80	66.6667	1	T	87	64	81.9444	1	4	0
nad4L	86	93.1624	20	71.875	85.3659	T	234	218	93.1624	1	27	3	20	0.999994	T	65	26	71.875	1	T	69	43	85.3659	1	4	0
nad5	629	93.1232	80	61.6487	86.6667	T	349	325	93.1232	1	59	45	80	1	T	324	179	61.6487	1	T	178	139	86.6667	1	4	0
ccmC	133	93.0233	62.5	80	93.9394	T	172	160	93.0233	1	44	23	62.5	1	T	53	29	80	1	T	50	41	93.9394	1	4	0
ccmFn	365	92.8854	91.8919	49.0909	83.3333	T	253	235	92.8854	1	46	40	91.8919	1	T	61	30	49.0909	1	T	42	31	83.3333	1	4	0
nad5	1310	92.7928	89.1304	72.4138	89.0909	T	333	309	92.7928	1	135	102	89.1304	1	T	264	129	72.4138	1	T	160	122	89.0909	1	4	0
nad7	344	92.7914	63.75	65.0794	77.451	T	652	605	92.7914	1	128	74	63.75	1	T	314	132	65.0794	1	T	296	185	77.451	1	4	0
nad7	1079	92.7318	73.6111	74	94.0741	T	798	740	92.7318	1	121	60	73.6111	1	T	201	79	74	1	T	219	141	94.0741	1	4	0
nad1	410	92.7136	88.2353	82.8947	86.7925	T	398	369	92.7136	1	77	34	88.2353	1	T	153	64	82.8947	1	T	168	113	86.7925	1	4	0
nad7	1057	92.5121	54.878	83.6066	93.4307	T	828	766	92.5121	1	136	59	54.878	1	T	268	107	83.6066	1	T	193	141	93.4307	1	4	0
nad4	1010	92.4939	98.9899	85.8209	80.7018	T	413	382	92.4939	1	122	105	98.9899	1	T	185	123	85.8209	1	T	158	99	80.7018	1	4	0
nad7	1088	92.4403	61.1111	74.1071	90.1515	T	754	697	92.4403	1	133	59	61.1111	1	T	220	88	74.1071	1	T	220	134	90.1515	1	4	0
nad2	1397	92.3747	42.3077	86	92.1875	T	459	424	92.3747	1	59	14	42.3077	1	T	137	45	86	1	T	115	72	92.1875	1	4	0
nad7	926	92.3409	56.25	81.25	84.1026	T	927	856	92.3409	1	79	44	56.25	1	T	232	152	81.25	1	T	274	183	84.1026	1	4	0
nad1	446	92.053	96.1538	88.6598	85.8491	T	302	278	92.053	1	50	27	96.1538	1	T	182	90	88.6598	1	T	154	102	85.8491	1	4	0
nad7	578	91.9926	70.8861	85.2547	91.844	T	1074	988	91.9926	1	198	126	70.8861	1	T	511	345	85.2547	1	T	381	316	91.844	1	4	0
mttB	648	91.9255	60	83.3333	84.2105	T	161	148	91.9255	1	21	10	60	1	T	70	32	83.3333	1	T	28	19	84.2105	1	4	0
ccmFn	1378	91.8367	76.4706	78.4431	87.2727	T	245	225	91.8367	1	20	14	76.4706	1	T	181	136	78.4431	1	T	71	56	87.2727	1	4	0
nad7	679	91.8203	62.1622	79.4118	89.3023	T	868	797	91.8203	1	50	26	62.1622	1	T	385	259	79.4118	1	T	303	239	89.3023	1	4	0
ccmFn	713	91.7949	69.2308	52.6316	72	T	195	179	91.7949	1	20	12	69.2308	1	T	57	30	52.6316	1	T	32	20	72	1	4	0
nad2	1394	91.6143	65.3846	82	89.2308	T	477	437	91.6143	1	59	21	65.3846	1	T	140	43	82	1	T	118	70	89.2308	1	4	0
rps12	284	91.5858	66.6667	76.087	97.0297	T	309	283	91.5858	1	176	83	66.6667	1	T	287	112	76.087	1	T	168	121	97.0297	1	4	0
nad1	483	91.5129	93.1818	92.7835	86	T	271	248	91.5129	1	100	50	93.1818	1	T	179	99	92.7835	1	T	166	106	86	1	4	0
ccmC	473	91.4062	21.4286	60.6061	72.7273	T	128	117	91.4062	1	16	3	21.4286	0.999989	T	38	22	60.6061	1	T	34	18	72.7273	1	4	0
nad1	125	91.3181	82.9099	78.4615	88.764	T	1267	1157	91.3181	1	829	617	82.9099	1	T	162	56	78.4615	1	T	138	92	88.764	1	4	0
mttB	529	91.195	63.6364	72.4138	86.6667	T	159	145	91.195	1	17	10	63.6364	1	T	40	25	72.4138	1	T	20	13	86.6667	1	4	0
nad4	368	91.0973	95.6522	76.2712	95.6522	T	483	440	91.0973	1	59	26	95.6522	1	T	124	51	76.2712	1	T	125	84	95.6522	1	4	0
ccmFn	949	91.0959	88.8889	64.1026	65.7143	T	292	266	91.0959	1	21	18	88.8889	1	T	89	54	64.1026	1	T	45	25	65.7143	1	4	0
nad2	803	91.0486	86	73.4568	83.75	T	391	356	91.0486	1	108	67	86	1	T	251	129	73.4568	1	T	119	77	83.75	1	4	0
ccmFn	773	90.9091	63.6364	73.5849	96.1538	T	209	190	90.9091	1	24	16	63.6364	1	T	57	40	73.5849	1	T	33	28	96.1538	1	4	0
ccmFn	151	90.6452	64.2857	72.7273	74.0741	T	310	281	90.6452	1	38	21	64.2857	1	T	51	19	72.7273	1	T	45	28	74.0741	1	4	0
ccmC	608	90.4762	38.4615	46.1538	95.6522	T	126	114	90.4762	1	20	6	38.4615	1	T	43	13	46.1538	1	T	44	27	95.6522	1	4	0
nad1	650	90.4605	91.6667	90	80.9524	T	304	275	90.4605	1	165	79	91.6667	1	T	208	126	90	1	T	116	72	80.9524	1	4	0
nad1	635	90.3553	94.1176	84.8214	83.6364	T	197	178	90.3553	1	102	70	94.1176	1	T	147	95	84.8214	1	T	77	49	83.6364	1	4	0
ccmFn	142	90.3537	60.7143	79.1667	76	T	311	281	90.3537	1	40	20	60.7143	1	T	54	22	79.1667	1	T	43	28	76	1	4	0
nad2	914	90.2622	73.4694	64.0625	78.75	T	267	241	90.2622	1	55	40	73.4694	1	T	249	131	64.0625	1	T	114	80	78.75	1	4	0
nad1	286	90.18	86.25	86.6667	98.1481	T	611	551	90.18	1	251	71	86.25	1	T	97	57	86.6667	1	T	75	58	98.1481	1	4	0
nad5	553	90.027	50	58.2609	82.1429	T	371	334	90.027	1	87	40	50	1	T	281	144	58.2609	1	T	216	164	82.1429	1	4	0
ccmFn	1439	90	72.7273	54.8387	67.9245	T	300	270	90	1	11	8	72.7273	1	T	102	53	54.8387	1	T	71	44	67.9245	1	4	0
nad1	644	89.9225	94.3662	90	81.9444	T	258	232	89.9225	1	161	81	94.3662	1	T	186	117	90	1	T	98	62	81.9444	1	4	0
nad4	1373	89.909	97.856	52.0548	85.6115	T	1209	1087	89.909	1	1107	983	97.856	1	T	106	39	52.0548	1	T	181	135	85.6115	1	4	0
nad4	1355	89.8263	95.3775	80.4878	83.6601	T	1209	1086	89.8263	1	1073	935	95.3775	1	T	137	71	80.4878	1	T	207	146	83.6601	1	4	0
nad2	401	89.7533	86.4198	72.5806	78.022	T	527	473	89.7533	1	143	120	86.4198	1	T	94	47	72.5806	1	T	140	88	78.022	1	4	0
nad2	794	89.7311	63.8298	29.9363	76.5432	T	409	367	89.7311	1	112	50	63.8298	1	T	273	51	29.9363	1	T	121	68	76.5432	1	4	0
nad4	158	89.6714	87.5	70.5882	88.7218	T	426	382	89.6714	1	125	92	87.5	1	T	147	77	70.5882	1	T	221	151	88.7218	1	4	0
nad4	896	89.2405	88.4615	86.2385	95.3125	T	316	282	89.2405	1	109	76	88.4615	1	T	180	105	86.2385	1	T	188	149	95.3125	1	4	0
nad4	1129	89.0909	93.6	84.7328	84.6667	T	660	588	89.0909	1	178	147	93.6	1	T	188	119	84.7328	1	T	214	148	84.6667	1	4	0
nad4	166	89.0558	89.7727	55.102	89.9225	T	466	415	89.0558	1	129	104	89.7727	1	T	135	56	55.102	1	T	212	147	89.9225	1	4	0
ccmC	76	89.0511	57.8947	55.2632	73.0769	T	137	122	89.0511	1	30	13	57.8947	1	T	54	22	55.2632	1	T	41	23	73.0769	1	4	0
nad5	1610	89.0311	86.3636	87.1622	94.697	T	547	487	89.0311	1	106	83	86.3636	1	T	195	137	87.1622	1	T	185	145	94.697	1	4	0
ccmFn	751	88.961	85.7143	72.7273	90.9091	T	154	137	88.961	1	24	21	85.7143	1	T	57	41	72.7273	1	T	28	24	90.9091	1	4	0
mttB	566	88.8112	63.6364	73.3333	94.4444	T	143	127	88.8112	1	12	7	63.6364	1	T	65	27	73.3333	1	T	25	18	94.4444	1	4	0
nad4	1211	88.6872	89.5238	72	83.3333	T	716	635	88.6872	1	134	118	89.5238	1	T	161	92	72	1	T	137	102	83.3333	1	4	0
ccmFn	38	88.4615	50	53.8462	100	T	104	92	88.4615	1	18	7	50	1	T	33	8	53.8462	1	T	21	15	100	1	4	0
ccmC	115	88.3333	70.8333	78.9474	94.1176	T	180	159	88.3333	1	37	21	70.8333	1	T	54	31	78.9474	1	T	52	41	94.1176	1	4	0
ccmFc	103	88.3333	48.3871	51.7241	77.7778	T	60	53	88.3333	1	50	18	48.3871	1	T	53	16	51.7241	1	T	33	17	77.7778	1	4	0
nad5	1589	88.1603	86.8852	93.7063	90.5109	T	549	484	88.1603	1	79	64	86.8852	1	T	196	146	93.7063	1	T	214	156	90.5109	1	4	0
nad1	653	87.8698	90.2778	80.6897	75.9036	T	338	297	87.8698	1	168	77	90.2778	1	T	215	117	80.6897	1	T	112	66	75.9036	1	4	0
ccmC	103	87.7907	76.1905	55.8824	83.3333	T	172	151	87.7907	1	32	18	76.1905	1	T	50	20	55.8824	1	T	44	32	83.3333	1	4	0
ccmFn	800	87.7049	77.7778	73.4694	80	T	244	214	87.7049	1	25	17	77.7778	1	T	55	36	73.4694	1	T	33	24	80	1	4	0
nad5	608	87.6676	46.2963	56.746	86.7769	T	373	327	87.6676	1	60	27	46.2963	1	T	298	153	56.746	1	T	154	121	86.7769	1	4	0
mttB	536	87.6623	46.1538	64.7059	94.1176	T	154	135	87.6623	1	20	8	46.1538	1	T	47	28	64.7059	1	T	22	16	94.1176	1	4	0
ccmC	575	87.6033	21.4286	60	83.3333	T	121	106	87.6033	1	19	4	21.4286	0.999992	T	40	15	60	1	T	57	25	83.3333	1	4	0
nad4	107	87.2449	92.4051	78.7879	96.1832	T	392	342	87.2449	1	131	101	92.4051	1	T	153	86	78.7879	1	T	224	166	96.1832	1	4	0
nad2	952	87.1148	87.931	47.619	85.9155	T	357	311	87.1148	1	93	81	87.931	1	T	222	97	47.619	1	T	88	69	85.9155	1	4	0
nad1	808	86.9396	64.7059	74.8387	83.0508	T	513	446	86.9396	1	50	18	64.7059	1	T	325	137	74.8387	1	T	197	118	83.0508	1	4	0
ccmFc	878	86.9048	80.7692	92.3077	85	T	84	73	86.9048	1	48	35	80.7692	1	T	58	39	92.3077	1	T	28	21	85	1	4	0
mttB	542	86.8966	45.4545	65.625	88.8889	T	145	126	86.8966	1	17	7	45.4545	1	T	43	25	65.625	1	T	23	16	88.8889	1	4	0
nad1	838	86.8766	66.6667	75.5556	76.9231	T	381	331	86.8766	1	39	15	66.6667	1	T	267	119	75.5556	1	T	166	90	76.9231	1	4	0
nad1	847	86.8035	69.2308	70.0855	80	T	341	296	86.8035	1	37	14	69.2308	1	T	229	100	70.0855	1	T	139	84	80	1	4	0
ccmB	172	86.6667	53.3333	56.5217	75	T	30	26	86.6667	1	17	8	53.3333	1	T	42	15	56.5217	1	T	23	14	75	1	4	0
ccmC	548	86.6667	21.4286	82.3529	83.3333	T	150	130	86.6667	1	19	4	21.4286	0.99999	T	53	32	82.3529	1	T	74	35	83.3333	1	4	0
nad2	367	86.4333	72.8395	56.8421	72.7273	T	457	395	86.4333	1	92	69	72.8395	1	T	123	58	56.8421	1	T	118	73	72.7273	1	4	0
ccmFn	1295	86.4198	76.1905	69.9029	72.5	T	162	140	86.4198	1	32	25	76.1905	1	T	128	81	69.9029	1	T	55	36	72.5	1	4	0
nad4	1151	86.4048	90.4	79.7101	86.8421	T	662	572	86.4048	1	184	151	90.4	1	T	195	117	79.7101	1	T	226	159	86.8421	1	4	0
nad4	74	86.4	76.1194	65.9341	77.6699	T	375	324	86.4	1	144	93	76.1194	1	T	156	63	65.9341	1	T	168	95	77.6699	1	4	0
nad2	1121	85.8491	67.6923	48.5294	80.3922	T	318	273	85.8491	1	83	50	67.6923	1	T	209	70	48.5294	1	T	79	47	80.3922	1	4	0
rps4	872	85.7724	73.6842	34.2857	60.5263	T	246	211	85.7724	1	75	43	73.6842	1	T	94	13	34.2857	1	T	66	29	60.5263	1	4	0
ccmFn	283	85.6031	72.4138	64.7059	80	T	257	220	85.6031	1	32	24	72.4138	1	T	59	33	64.7059	1	T	29	19	80	1	4	0
nad5	548	85.5696	55	36.6379	89.5954	T	395	338	85.5696	1	96	48	55	1	T	285	91	36.6379	1	T	223	184	89.5954	1	4	0
ccmFn	1396	85.5019	72.2222	62.4204	72.549	T	269	230	85.5019	1	21	14	72.2222	1	T	171	100	62.4204	1	T	72	43	72.549	1	4	0
nad4	1148	85.2986	88	75.5396	79.6053	T	653	557	85.2986	1	184	145	88	1	T	196	112	75.5396	1	T	226	148	79.6053	1	4	0
nad4L	100	85.2941	27.7778	61.5385	74.4681	T	238	203	85.2941	1	33	8	27.7778	1	T	60	19	61.5385	1	T	80	41	74.4681	1	4	0
ccmB	160	85.1852	46.6667	52.9412	46.1538	T	27	23	85.1852	1	22	7	46.6667	1	T	36	9	52.9412	1	T	23	6	46.1538	1	4	0
nad4	836	84.7059	71.5686	75	86.3014	T	425	360	84.7059	1	145	89	71.5686	1	T	164	88	75	1	T	208	150	86.3014	1	4	0
nad7	77	84.4156	100	82.2785	92.7536	T	462	390	84.4156	1	94	30	100	1	T	326	75	82.2785	1	T	196	103	92.7536	1	4	0
nad7	83	84.3882	95.8333	79.7468	87.8788	T	474	400	84.3882	1	94	28	95.8333	1	T	319	70	79.7468	1	T	172	85	87.8788	1	4	0
nad2	394	84.1603	76.25	74.5763	78.1609	T	524	441	84.1603	1	148	112	76.25	1	T	89	46	74.5763	1	T	133	86	78.1609	1	4	0
nad1	665	83.9599	88	73.3766	69.0476	T	399	335	83.9599	1	174	76	88	1	T	280	119	73.3766	1	T	121	62	69.0476	1	4	0
nad7	533	83.9442	71.6763	78.6787	77.4545	T	1138	962	83.9442	1	224	148	71.6763	1	T	426	278	78.6787	1	T	360	252	77.4545	1	4	0
nad2	56	83.8863	69.5652	78.5714	68.0851	T	211	177	83.8863	1	68	17	69.5652	1	T	228	35	78.5714	1	T	118	40	68.0851	1	4	0
ccmFc	1315	83.7838	91.6667	73.1343	88.5714	T	37	31	83.7838	1	44	34	91.6667	1	T	85	53	73.1343	1	T	40	32	88.5714	1	4	0
ccmFn	1312	83.5938	73.6842	73.9583	79.4118	T	128	107	83.5938	1	29	21	73.6842	1	T	114	79	73.9583	1	T	45	30	79.4118	1	4	0
ccmFn	1345	83.4197	64.7059	66	71.0526	T	193	161	83.4197	1	24	17	64.7059	1	T	169	101	66	1	T	45	30	71.0526	1	4	0
ccmFc	146	83.3333	67.6471	54.8387	55	T	54	45	83.3333	1	56	37	67.6471	1	T	56	18	54.8387	1	T	31	13	55	1	4	0
sdh4	194	82.7899	51.773	76.4602	89.4928	T	1656	1371	82.7899	1	353	93	51.773	1	T	1119	459	76.4602	1	T	1856	1129	89.4928	1	4	0
nad5	1550	82.5427	86.6667	84.252	82.1138	T	527	435	82.5427	1	52	39	86.6667	1	T	187	113	84.252	1	T	183	119	82.1138	1	4	0
ccmFn	98	82.197	61.5385	72	94.1176	T	264	217	82.197	1	50	26	61.5385	1	T	50	19	72	1	T	32	20	94.1176	1	4	0
nad2	782	82.0707	68.0851	38.6861	85.8824	T	396	325	82.0707	1	108	54	68.0851	1	T	266	55	38.6861	1	T	133	83	85.8824	1	4	0
nad2	956	81.7942	77.193	32.4607	80.5556	T	379	310	81.7942	1	90	70	77.193	1	T	224	68	32.4607	1	T	94	65	80.5556	1	4	0
nad4	29	81.5789	90.7407	51.5152	80.4348	T	190	155	81.5789	1	60	49	90.7407	1	T	76	20	51.5152	1	T	81	44	80.4348	1	4	0
nad2	1410	81.4815	25	63.8298	62.963	T	378	308	81.4815	1	54	8	25	1	T	122	32	63.8298	1	T	96	41	62.963	1	4	0
nad5	1580	81.1518	72.9167	61.6438	88.806	T	573	465	81.1518	1	67	43	72.9167	1	T	203	97	61.6438	1	T	211	150	88.806	1	4	0
rps3	1567	81.1297	75.1241	71.9424	91.6667	T	779	632	81.1297	1	3041	2171	75.1241	1	T	191	120	71.9424	1	T	196	171	91.6667	1	4	0
ccmB	374	80.531	63.3333	42.1053	87.0968	T	113	91	80.531	1	53	31	63.3333	1	T	74	30	42.1053	1	T	45	32	87.0968	1	4	0
ccmFn	1327	80.3797	84.2105	70.0855	78.5714	T	158	127	80.3797	1	31	27	84.2105	1	T	134	87	70.0855	1	T	49	37	78.5714	1	4	0
nad2	26	80	33.3333	70.3704	56.5217	T	120	96	80	1	45	5	33.3333	1	T	128	19	70.3704	1	T	74	16	56.5217	1	4	0
ccmB	422	79.5699	60	51.1628	87.5	T	93	74	79.5699	1	53	32	60	1	T	76	26	51.1628	1	T	44	24	87.5	1	4	0
ccmB	71	79.1667	60	61.5385	73.3333	T	48	38	79.1667	1	37	16	60	1	T	33	8	61.5385	1	T	43	16	73.3333	1	4	0
ccmC	399	78.9216	35.2941	16.4706	24.2424	T	204	161	78.9216	1	43	12	35.2941	1	T	126	15	16.4706	1	T	203	38	24.2424	1	4	0
nad2	311	78.7342	97.1831	83.8983	79.4521	T	395	311	78.7342	1	87	76	97.1831	1	T	161	105	83.8983	1	T	88	63	79.4521	1	4	0
nad4	977	78.2334	79.7468	61.3208	63.7168	T	317	248	78.2334	1	102	79	79.7468	1	T	134	70	61.3208	1	T	151	83	63.7168	1	4	0
ccmFn	372	78.0769	56.7568	24.1935	65.3846	T	260	203	78.0769	1	43	21	56.7568	1	T	67	16	24.1935	1	T	45	27	65.3846	1	4	0
ccmFc	1234	77.5281	98	56.0976	87.5	T	89	69	77.5281	1	87	82	98	1	T	49	25	56.0976	1	T	47	39	87.5	1	4	0
rpl16	383	77.4648	37.2093	80.8219	68.1818	T	142	110	77.4648	1	66	21	37.2093	1	T	111	62	80.8219	1	T	90	45	68.1818	1	4	0
ccmFc	1160	77.2152	83.3333	78.125	91.4286	T	79	61	77.2152	1	90	72	83.3333	1	T	69	51	78.125	1	T	38	34	91.4286	1	4	0
rpl10	155	77.0181	82.5758	72.2513	76.7442	T	1214	935	77.0181	1	170	124	82.5758	1	T	449	154	72.2513	1	T	126	70	76.7442	1	4	0
nad2	922	76.9517	66	39.4737	75.9494	T	269	207	76.9517	1	58	39	66	1	T	231	78	39.4737	1	T	114	78	75.9494	1	4	0
sdh4	353	74.7967	64.2857	81.8182	85.0746	T	123	92	74.7967	1	25	9	64.2857	1	T	196	135	81.8182	1	T	95	67	85.0746	1	4	0
mttB	364	73.8636	70	36.3636	80	T	88	65	73.8636	1	13	7	70	1	T	15	5	36.3636	1	T	13	8	80	1	4	0
ccmFc	119	73.2143	67.6471	40.7407	62.5	T	56	41	73.2143	1	43	27	67.6471	1	T	48	12	40.7407	1	T	34	12	62.5	1	4	0
rpl16	214	72.1477	90.6746	53.3981	82.4818	T	298	215	72.1477	1	631	521	90.6746	1	T	140	57	53.3981	1	T	180	131	82.4818	1	4	0
ccmB	286	71.2329	33.3333	40.4762	80	T	73	52	71.2329	1	20	5	33.3333	1	T	52	17	40.4762	1	T	25	14	80	1	4	0
nad7	1050	71.1844	34.5238	69.0476	82.7338	T	819	583	71.1844	1	137	39	34.5238	1	T	290	90	69.0476	1	T	198	129	82.7338	1	4	0
ccmB	80	70.8333	40	35.7143	53.3333	T	48	34	70.8333	1	37	12	40	1	T	36	5	35.7143	1	T	46	13	53.3333	1	4	0
mttB	604	70.5882	50	75	56.25	T	153	108	70.5882	1	13	6	50	1	T	71	32	75	1	T	26	12	56.25	1	4	0
nad5	155	70.3812	65.2174	72.7891	78.5714	T	341	240	70.3812	1	115	23	65.2174	1	T	694	122	72.7891	1	T	209	100	78.5714	1	4	0
nad7	38	70.2941	72.7273	68.8889	84.4828	T	340	239	70.2941	1	68	11	72.7273	1	T	185	34	68.8889	1	T	144	64	84.4828	1	4	0
ccmFc	122	69.6429	67.6471	48.1481	81.25	T	56	39	69.6429	1	42	27	67.6471	1	T	48	14	48.1481	1	T	34	16	81.25	1	4	0
nad9	92	68.6813	31.5789	27.4809	49.0385	T	182	125	68.6813	1	88	21	31.5789	1	T	318	38	27.4809	1	T	147	60	49.0385	1	4	0
nad9	298	67.4419	18.4502	44.0476	63.3929	T	387	261	67.4419	1	386	71	18.4502	1	T	496	192	44.0476	1	T	148	73	63.3929	1	4	0
rpl16	110	66.7665	89.2523	48.1481	83.5443	T	334	223	66.7665	1	532	398	89.2523	1	T	108	30	48.1481	1	T	111	68	83.5443	1	4	0
nad9	439	65.1917	12.1581	32.7485	53.0769	T	339	221	65.1917	1	583	47	12.1581	1	T	525	120	32.7485	1	T	190	81	53.0769	1	4	0
rpl16	108	64.3068	76.8692	40.7407	53.2468	T	339	218	64.3068	1	537	341	76.8692	1	T	118	24	40.7407	1	T	111	43	53.2468	1	4	0
nad9	328	64.3068	14.8649	39.4737	42.735	T	339	218	64.3068	1	467	63	14.8649	1	T	471	159	39.4737	1	T	163	55	42.735	1	4	0
ccmB	338	63.2184	13.7931	29.0909	90.3226	T	87	55	63.2184	1	33	4	13.7931	1	T	74	19	29.0909	1	T	44	33	90.3226	1	4	0
mttB	367	60.7595	40	30	70	T	79	48	60.7595	1	12	4	40	1	T	14	4	30	0.999999	T	13	7	70	1	4	0
ccmB	154	54.8387	53.3333	47.0588	53.8462	T	31	17	54.8387	1	24	10	53.3333	1	T	37	8	47.0588	1	T	23	7	53.8462	1	4	0
atp4	382	54.6763	51.9824	41.2587	31.5789	T	278	152	54.6763	1	372	192	51.9824	1	T	214	63	41.2587	1	T	181	45	31.5789	1	4	0
ccmB	313	52.9412	17.6471	18.5185	64	T	85	45	52.9412	1	21	3	17.6471	0.999841	T	70	12	18.5185	1	T	35	18	64	1	4	0
ccmB	128	52.6316	20	35.2941	36.3636	T	38	20	52.6316	1	26	5	20	0.99999	T	41	8	35.2941	1	T	28	6	36.3636	1	4	0
ccmB	164	51.7241	33.3333	34.7826	46.6667	T	29	15	51.7241	1	22	5	33.3333	1	T	45	8	34.7826	1	T	22	7	46.6667	1	4	0
nad2	1402	50.1235	26.9231	30.6122	38.5965	T	405	203	50.1235	1	59	9	26.9231	1	T	132	17	30.6122	1	T	105	26	38.5965	1	4	0
rpl16	389	48.3607	23.8095	48.4848	65.4545	T	122	59	48.3607	1	64	10	23.8095	1	T	100	32	48.4848	1	T	77	36	65.4545	1	4	0
ccmB	137	46.1538	53.3333	33.3333	63.6364	T	26	12	46.1538	1	24	10	53.3333	1	T	39	6	33.3333	1	T	25	10	63.6364	1	4	0
ccmFc	744	45.7143	33.3333	18.4211	38.8889	T	70	32	45.7143	1	26	8	33.3333	1	T	51	7	18.4211	1	T	21	7	38.8889	1	4	0
ccmC	605	44.2748	28.5714	28	60	T	131	58	44.2748	1	20	5	28.5714	1	T	40	8	28	1	T	45	17	60	1	4	0
ccmFc	310	43.6123	51.8519	46.6667	18.0556	T	227	99	43.6123	1	298	31	51.8519	1	T	151	30	46.6667	1	T	186	16	18.0556	1	4	0
nad4	1101	42.4074	61.0619	46.9231	59.5238	T	540	229	42.4074	1	167	81	61.0619	1	T	197	67	46.9231	1	T	180	84	59.5238	1	4	0
atp1	1425	33.998	26.7969	12.6246	10.9005	T	1003	341	33.998	1	3315	778	26.7969	1	T	381	41	12.6246	1	T	923	90	10.9005	1	4	0
ccmFn	279	30.8594	20.6897	10.2041	55.5556	T	256	79	30.8594	1	32	7	20.6897	1	T	58	5	10.2041	1	T	27	10	55.5556	1	4	0
nad2	609	28.0576	47.8261	17.0455	17.284	T	417	117	28.0576	1	137	11	47.8261	1	T	815	15	17.0455	1	T	210	14	17.284	1	4	0
sdh4	203	27.8024	16.4286	16.8174	11.24	T	1356	377	27.8024	1	239	28	16.4286	1	T	1134	98	16.8174	1	T	1909	150	11.24	1	4	0
nad7	531	27.3276	12.9944	16.9139	28	T	1160	317	27.3276	1	230	27	12.9944	1	T	427	60	16.9139	1	T	357	88	28	1	4	0
atp8	393	25	17.2414	30.8271	18.4524	T	232	58	25	1	77	6	17.2414	1	T	234	44	30.8271	1	T	249	34	18.4524	1	4	0
nad4L	197	20.0565	22.5806	24	21.3115	T	354	71	20.0565	1	136	11	22.5806	1	T	272	19	24	1	T	180	15	21.3115	1	4	0
nad7	963	11.1575	11.8421	20.1058	19.2708	T	959	107	11.1575	1	108	12	11.8421	1	T	305	38	20.1058	1	T	288	40	19.2708	1	4	0
